# Supplementary material for: Photocatalytic S -alkylation of sulfinamides: access to sulfoximines
Source: Royal Society of Chemistry journal article supplement (doi:10.1039/d5cc06998j), 2026-01-01
Supplement: d5cc06998j1.pdf [file d5cc06998j1.pdf]

## Supporting Information

### Photocatalytic S-alkylation of sulfinamides: access to sulfoximines

Ivan Sliusarevskiy<sup>1</sup>, Haripriyo Mondal<sup>2</sup> and Rene M. Koenigs\*<sup>1,2</sup>

<sup>1</sup>Institute of Organic Chemistry, RWTH Aachen University, Landoltweg 1, 52074 Aachen, Germany.

<sup>2</sup>University of Bayreuth, Organic Chemistry II, Universitätsstraße 30, 95447 Bayreuth, Germany.

*E-mail:* [rene.koenigs@uni-bayreuth.de](mailto:rene.koenigs@uni-bayreuth.de)

#### Table of Contents

|                         |     |
|-------------------------|-----|
| General Information     | S1  |
| General Procedures      | S2  |
| Reaction Optimization   | S4  |
| Control Experiments     | S7  |
| Incompatible Substrates | S11 |
| Physical data           | S12 |
| Spectra                 | S32 |
| References              | S70 |

## 1. General Information

Unless otherwise noted, all commercially available compounds were used as provided without further purification. Chemicals used in this manuscript were purchased from Sigma Aldrich, Alfa Aesar, Fluorochem, BLD Pharm and Carl Roth. Solvents used in reactions were p.A. grade. Solvents for chromatography were technical grade and distilled prior to use. Analytical thin-layer chromatography (TLC) was performed on Macherey-Nagel silica gel aluminium plates with F-254 indicator, visualized by irradiation with UV light. Column chromatography was performed using silica gel Merck 60 (particle size 0.063 – 0.2 mm). Solvent mixtures are understood as volume/volume.  $^1\text{H}$  NMR,  $^{13}\text{C}$  NMR and  $^{19}\text{F}$  NMR were recorded on a Varian AV600 in  $\text{CDCl}_3$  and  $\text{DMSO}-d_6$ . Data are reported in the following order: chemical shift ( $\delta$ ) in ppm; multiplicities are indicated br (broadened singlet), s (singlet), d (doublet), t (triplet), q (quartet), m (multiplet); coupling constants ( $J$ ) are in Hertz (Hz). HRMS data were recorded on a ThermoFisher Scientific LTQ Orbitrap XL using ESI ionization or on a Finnigan MAT 95 using EI ionization at 70 eV. LEDs used in this manuscript were purchased from Kessil : KSPR160L PR160L Rating: 19VDC, 40W.

## 2. General Procedures

### General procedure for the preparation of sulfinamides (GP-1) <sup>[1, 2]</sup>

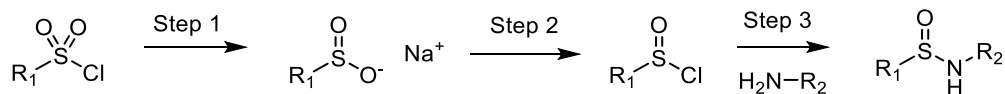

**Step 1:** To a solution of NaHCO<sub>3</sub> (2.0 mmol, 2.0 equiv.) and Na<sub>2</sub>SO<sub>3</sub> (1.0 mmol, 2.0 equiv.) in distilled water (40 mL), the corresponding sulfonyl chloride (1.0 mmol, 1.0 equiv.) was added. The reaction mixture was heated to 90 °C and stirred for 5 h. After completion, the aqueous phase was azeotropically dried by co-evaporation with toluene under reduced pressure. The resulting residue was washed with hot methanol, and the solution was concentrated under high vacuum.

**Step 2:** The crude material was suspended in toluene (40 mL), cooled to 0 °C, and treated with oxalyl chloride (0.95 mmol, 0.95 equiv.). The mixture was then warmed to 20 °C and stirred for 1 h.

**Step 3:** The resulting solution was added dropwise to a mixture of the corresponding amine (1.05 mmol, 1.05 equiv.) and triethylamine (2.0 mmol, 2.0 equiv.) dissolved in toluene (20 mL) at 0 °C. After stirring for 2 h, the reaction mixture was transferred to a separating funnel, diluted with ethyl acetate (150 mL), and washed with brine (2 × 200 mL). The combined organic layers were dried over Na<sub>2</sub>SO<sub>4</sub>, filtered, and concentrated in vacuo. Purification by silica gel column chromatography afforded the desired product.

### General procedure for the Photocatalytic S-Alkylation of Sulfinamides (GP-2)

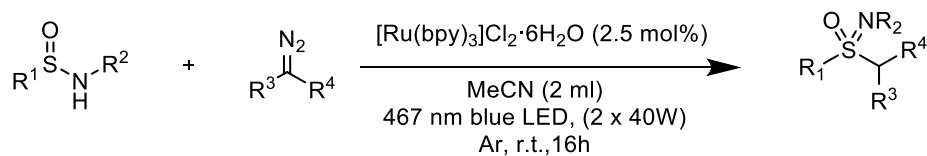

To a reaction tube equipped with a magnetic stir bar, sulfinamide (0.2 mmol, 1.0 equiv.) and  $[\text{Ru}(\text{bpy})_3]\text{Cl}_2 \cdot 6\text{H}_2\text{O}$  (2.5 mol%) were added. The tube was then sealed, evacuated, and backfilled with argon three times followed by the addition of diazo compound (1.2 mmol, 6.0 equiv.) dissolved in 2 mL anhydrous Acetonitrile (2.0 mL, 0.1 M) via a syringe. The resulting solution was irradiated with a 2 x 40 W blue LED (467 nm) with stirring at a distance of ~1.5 cm with an external cooling fan for 16 h. After completion, the crude mixture was purified by column chromatography on silica gel using *n*-hexane/ethyl acetate mixtures as eluent, affording the desired products.



### 3. Reaction Optimization

**Table S1:** Optimization of catalyst

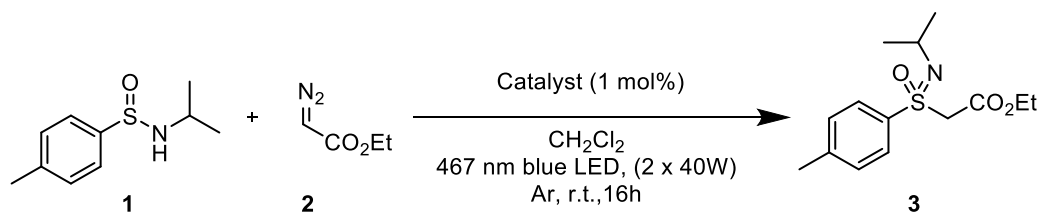

| Entry* | Catalyst                                                         | <b>3</b> (%) <sup>†</sup> |
|--------|------------------------------------------------------------------|---------------------------|
| 1      | 4-CzIPN                                                          | trace                     |
| 2      | Fluorescein                                                      | trace                     |
| 3      | Eosin Y                                                          | trace                     |
| 4      | $[\text{Ru}(\text{bpy})_3]\text{Cl}_2 \cdot 6\text{H}_2\text{O}$ | 47                        |
| 5      | -                                                                | trace                     |

\*Reactions were carried out (**1/2** = 0.2/1.0 mmol) in 2.0 mL  $\text{CH}_2\text{Cl}_2$  under blue light (2 x 40 W, 467 nm) with an external cooling fan. <sup>†</sup>Yields of **3** were determined by  $^1\text{H}$  NMR spectroscopic analyses of the reaction mixture using 1,3,5-trimethoxybenzene as the internal standard.

**Table S2.** Investigation of solvents, light intensity and catalyst loading.

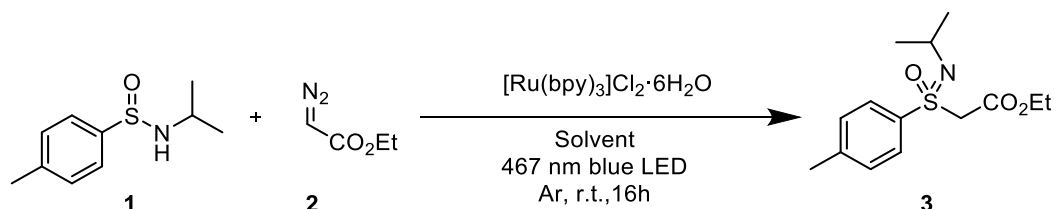

| Entry* | Solvent         | Light Intensity | Catalyst loading | <b>3</b> (%) <sup>†</sup> |
|--------|-----------------|-----------------|------------------|---------------------------|
| 1      | $\text{CHCl}_3$ | 40W*2           | 1 mol%           | 36                        |
| 2      | DCE             | 40W*2           | 1 mol%           | 50                        |
| 3      | MeCN            | 40W*2           | 1 mol%           | 60                        |
| 4      | Toluen          | 40W*2           | 1 mol%           | 43                        |
| 5      | Acetone         | 40W*2           | 1 mol%           | 55                        |
| 6      | THF             | 40W*2           | 1 mol%           | 22                        |
| 7      | MeCN            | 20W*2           | 1 mol%           | 21                        |
| 8      | MeCN            | 30W*2           | 1 mol%           | 33                        |
| 9      | MeCN            | 40W*2           | 2.5 mol%         | 78                        |
| 10     | MeCN            | 40W*2           | 5 mol %          | 73                        |

|    |      |       |          |    |
|----|------|-------|----------|----|
| 11 | MeCN | 40W*2 | 10 mol % | 74 |
|----|------|-------|----------|----|

\*Reactions were carried out (**1**/**2** = 0.2/1.0 mmol) in 2.0 mL solvent under blue light (467 nm) with an external cooling fan. †Yields of **3** were determined by <sup>1</sup>H NMR spectroscopic analyses of the reaction mixture using 1,3,5-trimethoxybenzene as the internal standard.

**Table S3.** Investigation of equivalents and time

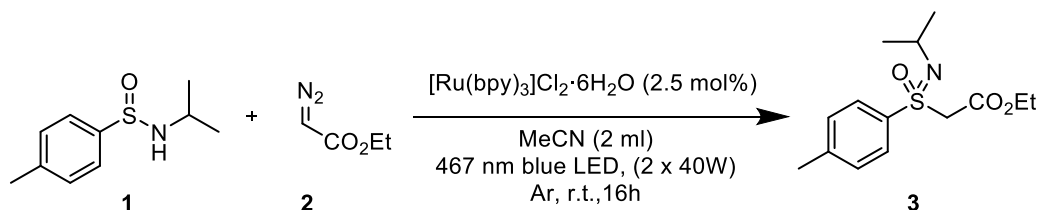

| Entry <sup>*</sup> | <b>1</b> : <b>2</b> (equiv.) | time  | <b>3</b> (%) <sup>†</sup> |
|--------------------|------------------------------|-------|---------------------------|
| 1                  | 2:1                          | 16 h  | 18                        |
| 2                  | 1:1                          | 16 h  | 30                        |
| 3                  | 1:2                          | 16 h  | 47                        |
| 4                  | 1:3                          | 16 h  | 64                        |
| 5                  | 1:4                          | 16 h  | 71                        |
| 6                  | 1:5                          | 16 h  | 78                        |
| 7                  | 1:6                          | 16 h  | 96                        |
| 8                  | 1:6                          | 0.5 h | 12                        |
| 9                  | 1:6                          | 1 h   | 20                        |
| 10                 | 1:6                          | 2 h   | 28                        |
| 11                 | 1:6                          | 4 h   | 44                        |

\*Reactions were carried out in 2.0 mL MeCN solvent under blue light (2 x 40 W, 467 nm) with an external cooling fan. †Yields of **3** were determined by <sup>1</sup>H NMR spectroscopic analyses of the reaction mixture using 1,3,5-trimethoxybenzene as the internal standard.

**Table S4.** Investigation of further changes.

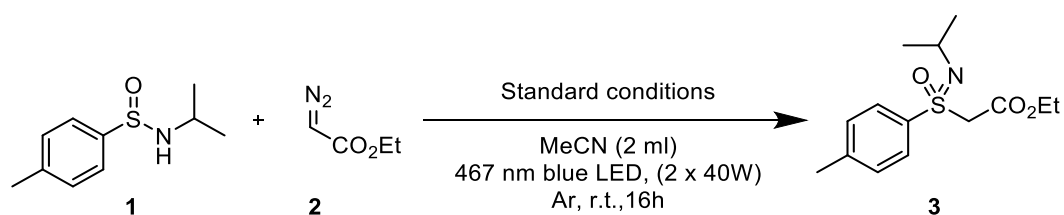

| Entry <sup>*</sup> | changes                     | <b>3</b> (%) <sup>†</sup> |
|--------------------|-----------------------------|---------------------------|
| 1                  | HFIP (1 equiv.)             | 61                        |
| 2                  | NEt <sub>3</sub> (1 equiv.) | 21                        |
| 3                  | H <sub>2</sub> O (2 equiv.) | 27                        |
| 4                  | under air                   | 24                        |
| 5                  | no Catalyst                 | trace                     |
| 6                  | 370 nm light                | 21                        |
| 7                  | No light, 60°C              | trace                     |

<sup>\*</sup>Reactions were carried out (**1/2** = 0.2/1.2 mmol) in 2.0 mL MeCN under blue light (2 x 40 W, 467 nm) with an external cooling fan. <sup>†</sup>Yields of **3** were determined by <sup>1</sup>H NMR spectroscopic analyses of the reaction mixture using 1,3,5-trimethoxybenzene as the internal standard.

## 4. Control experiments

### 4a. Radical Trapping Experiment

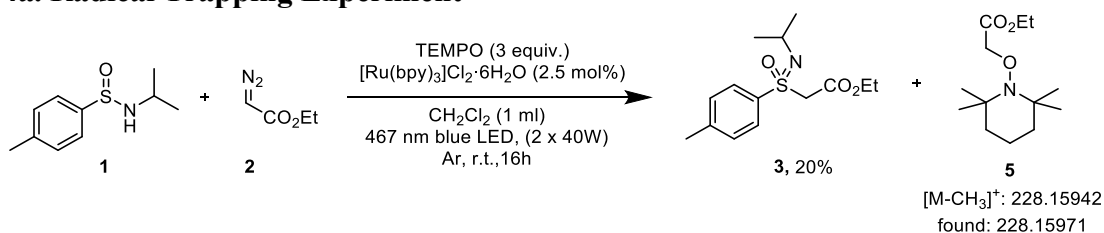

To a reaction tube equipped with a magnetic stir bar, sulfonamide (0.2 mmol, 1.0 equiv.), TEMPO (0.6 mmol, 3 equiv.) and [Ru(bpy)<sub>3</sub>]Cl<sub>2</sub>·6H<sub>2</sub>O (2.5 mol%) were added. The tube was then sealed, evacuated, and backfilled with argon three times followed by the addition of diazo compound (1.2 mmol, 6.0 equiv.) dissolved in 2 mL anhydrous Acetonitrile (2.0 mL, 0.1 M) via a syringe. The resulting solution was irradiated with a 2 x 40 W blue LED (467 nm) with stirring at a distance of ~1.5 cm with an external cooling fan for 16 h. After completion, the crude mixture was purified by column chromatography on silica gel using *n*-hexane/ethyl acetate mixtures as eluent, affording the desired products. The <sup>1</sup>H-NMR of the crude reaction mixture confirmed 20% of desired product **3** formation. In addition, the TEMPO adduct **5** was detected in HRMS. **HRMS** (ESI): *m/z*: [M-CH<sub>3</sub>]<sup>+</sup> Calcd. for C<sub>12</sub>H<sub>22</sub>NO<sub>3</sub><sup>+</sup>: 228.15942; Found: 228.15971.

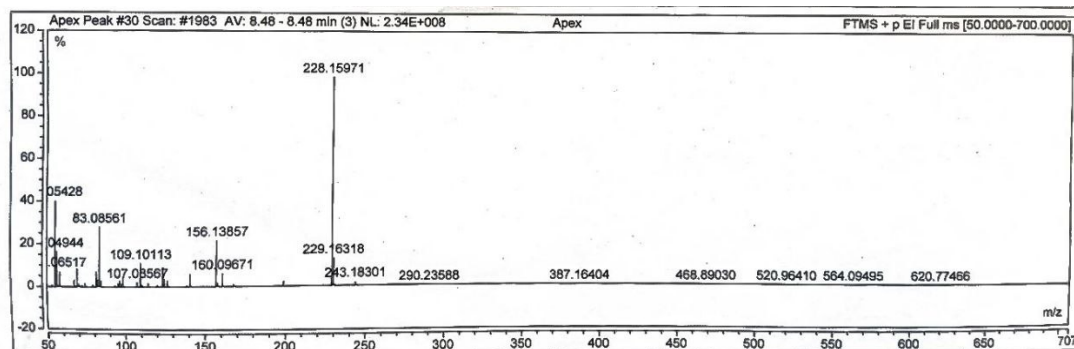

### 4b. On-off Experiments

Several model reactions according to General Procedure GP2 were set up in parallel and irradiated with 2 x 40 W (467 nm) purple LEDs at a distance of ~1.5 cm (with cooling by the fan) and/or in the absence of light. Every 30 minutes, one reaction was analyzed by <sup>1</sup>H NMR to determine the yield of the corresponding product using 1,3,5-trimethoxybenzene as an internal standard.

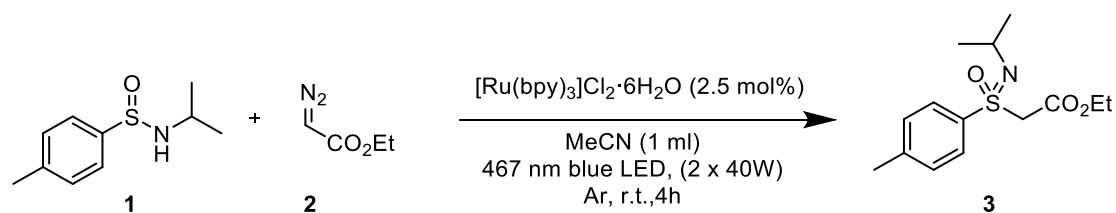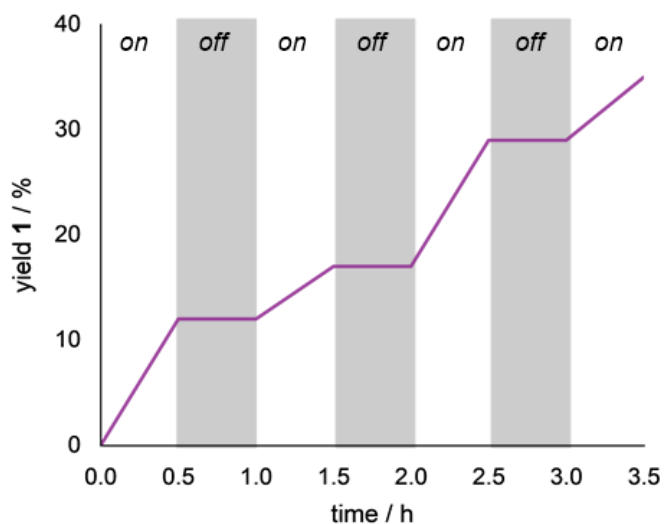

#### 4c. Fluorescence quenching experiment

Fluorescence quenching experiments were performed on a Simazu RF-6000 Spectro Fluorophotometer.  $\text{Ru}(\text{bpy})_3\text{Cl}_2 \cdot 6\text{H}_2\text{O}$  (0.01 mM) solutions were excited at 451 nm and emission intensity at 614 nm were collected. All the measurements were carried out mixing a solution of 0.01 mM solution of photocatalyst in dry degassed acetonitrile and appropriate amount of quencher dissolved in 0.01 mM solution of photocatalyst in a screw top 1.0 cm quartz cuvette. Samples were degassed and the emission spectra of the samples were collected.  $I_0$  is the intensity without quencher, and  $I$  is the intensity with quencher. Plots were drawn according to the Stern-Volmer equation and  $K_q$  were calculated. Stern-Volmer equation:  $I_0/I = 1 + K_q[Q]$

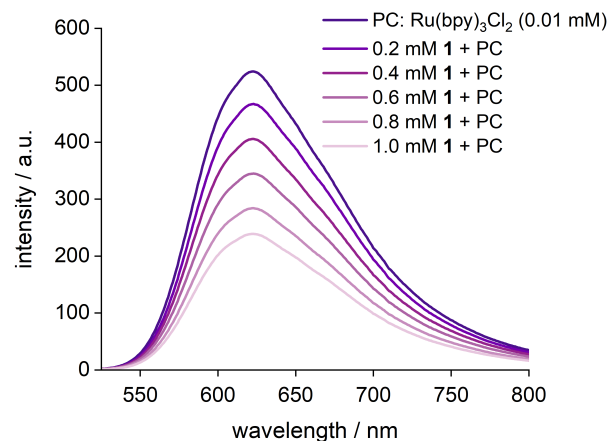

**Figure S1.** The luminescence spectra of  $\text{Ru}(\text{bpy})_3\text{Cl}_2 \cdot 6\text{H}_2\text{O}$  with different concentration of **1** excited at 451 nm.

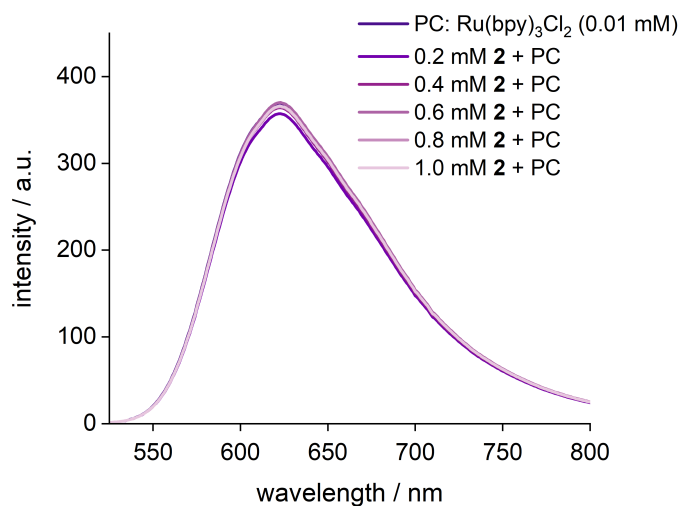

**Figure S2.** The luminescence spectra of  $\text{Ru}(\text{bpy})_3\text{Cl}_2 \cdot 6\text{H}_2\text{O}$  with different concentration of **2** excited at 451 nm.

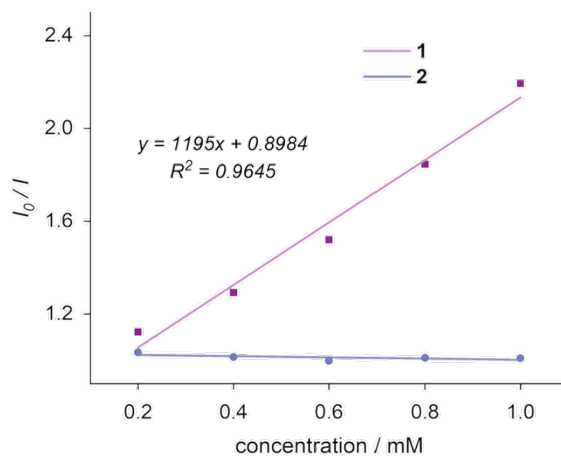

**Figure S3.** Stern-Volmer plot of  $\text{Ru}(\text{bpy})_3\text{Cl}_2 \cdot 6\text{H}_2\text{O}$  at different quenchers

The reported excited-state lifetime for  $\text{Ru}(\text{bpy})_3\text{Cl}_2 \cdot 6\text{H}_2\text{O}$  (1100 ns) was used for  $K_q$  calculations.<sup>[3]</sup> Calculated value of  $K_q$  for **1** was  $1.09 \times 10^9 \text{ M}^{-1}\text{s}^{-1}$ .

#### 4d. Image of photoinduced reaction set-up

Front view:

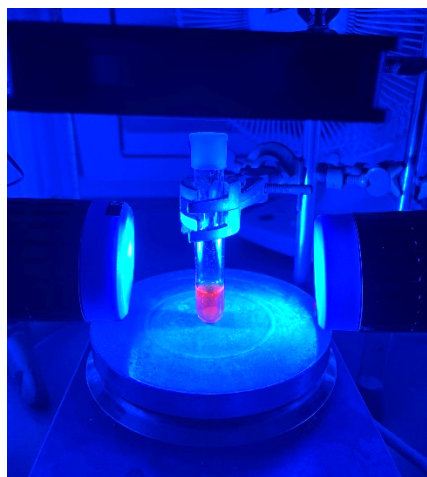

Side view:

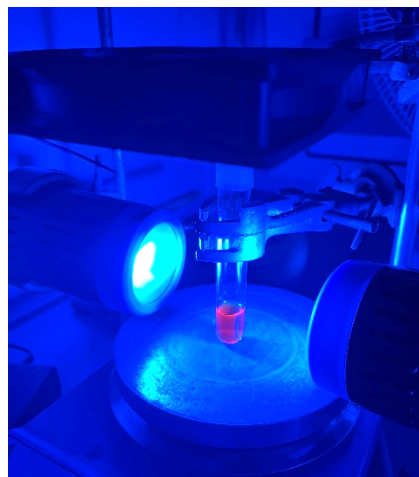

#### 4e. UV-Vis spectra

UV-Vis absorption spectra were recorded on a Shimadzu UV-1900i UV-Vis Spectrophotometer at room temperature using quartz cuvettes (1.0 cm path length). All samples were prepared in acetonitrile ( $\text{CH}_3\text{CN}$ ) at a concentration of  $10^{-2} \text{ M}$ . The absorption spectra of **1**, **2**, and  $\text{Ru}(\text{bpy})_3\text{Cl}_2 \cdot 6\text{H}_2\text{O}$  were measured independently under identical conditions.  $\text{Ru}(\text{bpy})_3\text{Cl}_2 \cdot 6\text{H}_2\text{O}$  exhibited a maximum absorbance ( $\lambda_{\text{max}}$ ) at 451 nm.

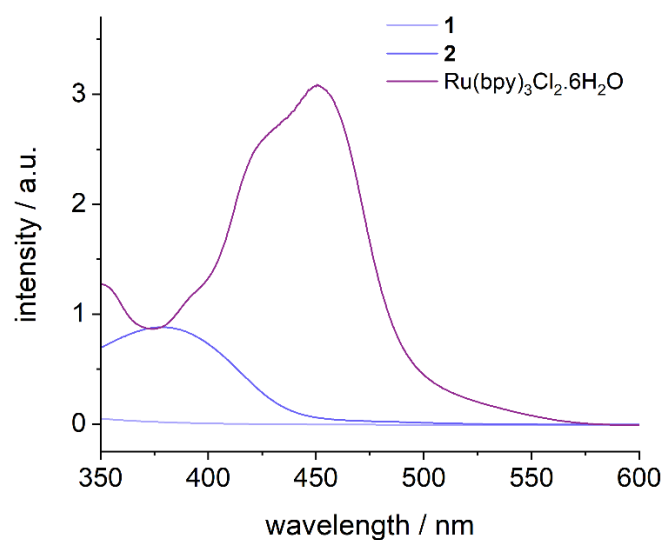

**Figure S4.** UV-Vis absorption spectra of **1**, **2**, and Ru(bpy)<sub>3</sub>Cl<sub>2</sub>·6H<sub>2</sub>O recorded in CH<sub>3</sub>CN (10<sup>-2</sup> M) at room temperature.

## 5. Incompatible substrates

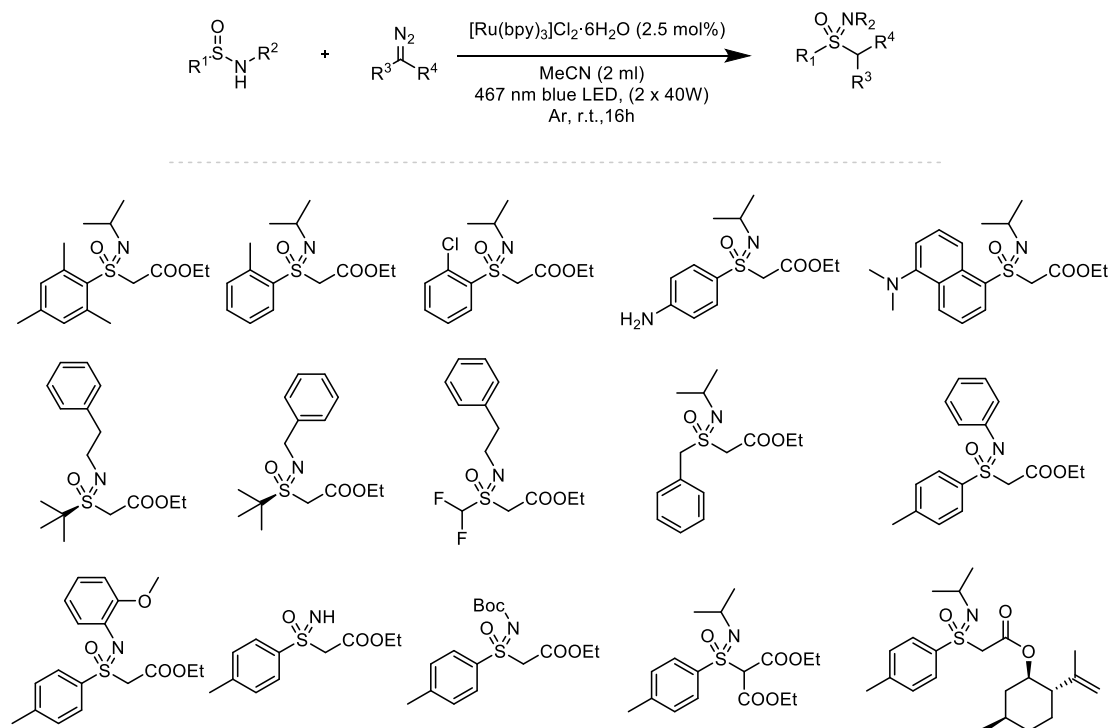

**Figure S5:** Incompatible substrates

To a reaction tube equipped with a magnetic stir bar, sulfinamide (0.2 mmol, 1.0 equiv.) and [Ru(bpy)<sub>3</sub>]Cl<sub>2</sub>·6H<sub>2</sub>O (2.5 mol%) were added. The tube was then sealed, evacuated, and backfilled with argon three times followed by the addition of diazo compound (1.2 mmol, 6.0 equiv.) dissolved in 2 mL anhydrous Acetonitrile (2.0 mL, 0.1 M) via a syringe. The resulting solution was irradiated with a 2 x 40 W blue LED (467 nm) with stirring at a distance of ~1.5 cm with an external cooling fan for 16 h. After completion, the crude mixture was analyzed by <sup>1</sup>H spectroscopy.



## 6. Physical Data

### *N*-isopropyl-4-methylbenzenesulfinamide (**1**)

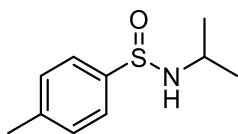

The title compound **1** was obtained either according to general procedure **GP-1** or via the hydrolysis protocol. **Hydrolysis protocol:** a stirred solution of ethyl 2-(*N*-isopropyl-4-methylphenylsulfonimidoyl)acetate (57 mg, 0.20 mmol, 1.0 equiv) and 4-acetamidobenzenesulfonyl azide (58 mg, 0.24 mmol, 1.2 equiv) in acetonitrile (2 mL) was cooled to 0 °C. Cesium carbonate (72 mg, 0.22 mmol, 1.1 equiv) was then added, and the reaction mixture was stirred for 16 h. Upon completion, the mixture was diluted with ethyl acetate (10 mL), and washed with brine (2 × 10 mL). The combined organic layers were dried over Na<sub>2</sub>SO<sub>4</sub>, filtered, and concentrated in vacuo. Purification by silica gel column chromatography (n-hexane:ethyl acetate, 1:2) afforded the desired product (GP-1: 159 mg, 81%; Hydrolysis procedure: 31 mg, 79%).

<sup>1</sup>H NMR (600 MHz, Chloroform-*d*): δ = 7.58 (d, *J* = 8.3 Hz, 2H), 7.28 (d, *J* = 7.9 Hz, 2H), 3.82 (d, *J* = 6.4 Hz, 1H), 3.63 – 3.55 (m, *J* = 6.4 Hz, 1H), 2.40 (s, 3H), 1.28 (d, *J* = 6.4 Hz, 3H), 1.14 (d, *J* = 6.6 Hz, 3H) ppm.

<sup>13</sup>C NMR (151 MHz, Chloroform-*d*): δ = 142.2, 141.1, 129.4, 125.7, 46.0, 24.8, 24.4, 21.3 ppm.

HRMS (ESI): *m/z*: [M+H]<sup>+</sup> Calcd. for C<sub>10</sub>H<sub>16</sub>NOS<sup>+</sup>: 198.09471; Found: 198.09481.

### *N*-isopropyl-4-(5-methyl-3-phenylisoxazol-4-yl)benzenesulfinamide (**1m**)

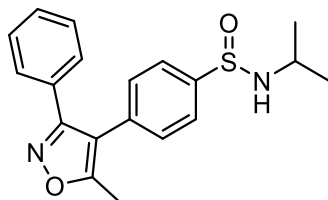

The title compound **1m** was synthesized according to the general procedure (**GP-1**) and was obtained after silica column chromatography (*n*-hexane : ethyl acetate 1:2) as a yellow solid (65%, 44 mg).

**<sup>1</sup>H NMR** (600 MHz, Chloroform-*d*):  $\delta$  = 7.71 (d,  $J$  = 8.3 Hz, 2H), 7.41 – 7.36 (m, 3H), 7.34 – 7.28 (m, 4H), 3.89 (d,  $J$  = 6.3 Hz, 1H), 3.65 (h,  $J$  = 6.4 Hz, 1H), 2.48 (s, 3H), 1.31 (d,  $J$  = 6.4 Hz, 3H), 1.17 (d,  $J$  = 6.4 Hz, 3H) ppm.

**<sup>13</sup>C NMR** (151 MHz, Chloroform-*d*):  $\delta$  = 167.0, 161.1, 144.7, 133.2, 130.0, 129.5, 128.7, 128.5, 128.4, 126.2, 114.8, 46.3, 24.8, 24.4, 11.7 ppm.

**HRMS** (ESI):  $m/z$ :  $[M+Na]^+$  Calcd. for  $C_{19}H_{20}N_2O_2SNa^+$ : 363.11377; Found: 363.11277.

**ethyl 2-(*N*-isopropyl-4-methoxyphenylsulfonimidoyl)acetate (3a)**

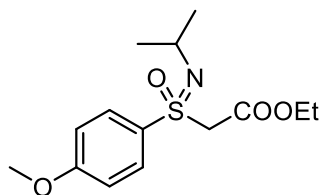

The title compound **3a** was synthesized according to the general procedure (**GP-2**) and was obtained after silica column chromatography (*n*-hexane : ethyl acetate 1:1) as a yellow oil (85%, 51 mg).

**<sup>1</sup>H NMR** (600 MHz, Chloroform-*d*):  $\delta$  = 7.84 (d,  $J$  = 8.9 Hz, 2H), 6.99 (d,  $J$  = 8.9 Hz, 2H), 4.11 (s, 2H), 4.12 – 4.05 (m, 2H), 3.86 (s, 3H), 3.50 (h,  $J$  = 6.3 Hz, 1H), 1.20 (d,  $J$  = 6.3 Hz, 3H), 1.19 – 1.14 (m, 6H) ppm.

**<sup>13</sup>C NMR** (151 MHz, Chloroform-*d*):  $\delta$  = 163.4, 163.2, 131.4, 130.0, 114.1, 61.8, 60.8, 55.6, 46.6, 26.7, 26.5, 13.9 ppm.

**HRMS** (ESI):  $m/z$ :  $[M+Na]^+$  Calcd. for  $C_{14}H_{21}NO_4SNa^+$ : 322.10835; Found: 322.10804.

**ethyl 2-(*N*-isopropyl-4-(trifluoromethyl)phenylsulfonimidoyl)acetate (3b)**

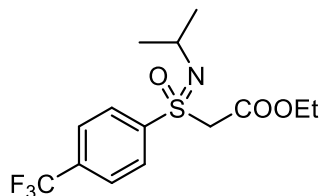

The title compound **3b** was synthesized according to the general procedure (**GP-3**) and was obtained after silica column chromatography (*n*-hexane : ethyl acetate 2:1) as a yellow oil (58%, 39 mg).

**<sup>1</sup>H NMR** (600 MHz, Chloroform-*d*):  $\delta$  = 8.09 (d,  $J$  = 8.2 Hz, 2H), 7.81 (d,  $J$  = 8.2 Hz, 2H), 4.17 (s, 2H), 4.14 – 4.06 (m, 2H), 3.55 – 3.48 (m, 1H), 1.23 (d,  $J$  = 6.2 Hz, 3H), 1.20 – 1.15 (m, 6H) ppm.

**<sup>13</sup>C NMR** (151 MHz, Chloroform-*d*):  $\delta$  = 162.7, 142.8, 134.8 (q,  $J$  = 32.9 Hz), 129.9, 126.0 (q,  $J$  = 3.7 Hz), 123.2 (q,  $J$  = 273.4 Hz), 62.1, 60.6, 46.9, 26.6, 26.4, 13.8 ppm.

**<sup>19</sup>F NMR** (564 MHz, Chloroform-*d*):  $\delta$  = -63.11 ppm.

**HRMS** (ESI):  $m/z$ :  $[M+Na]^+$  Calcd. for C<sub>14</sub>H<sub>18</sub>NO<sub>3</sub>F<sub>3</sub>SN<sup>+</sup>: 360.08517; Found: 360.08484.

### ethyl 2-(*N*-isopropyl-4-nitrophenylsulfonimidoyl)acetate (**3c**)

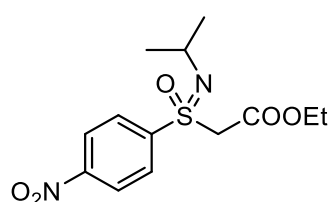

The title compound **3c** was synthesized according to the general procedure (**GP-2**) and was obtained after silica column chromatography (*n*-hexane : ethyl acetate 1:1) as a yellow oil (16%, 10 mg).

**<sup>1</sup>H NMR** (600 MHz, Chloroform-*d*):  $\delta$  = 8.38 (d,  $J$  = 8.8 Hz, 2H), 8.15 (d,  $J$  = 8.8 Hz, 2H), 4.19 (s, 2H), 4.16 – 4.09 (m, 2H), 3.57 – 3.49 (m, 1H), 1.24 (d,  $J$  = 6.3 Hz, 3H), 1.22 – 1.17 (m, 6H) ppm.

**<sup>13</sup>C NMR** (151 MHz, Chloroform-*d*):  $\delta$  = 162.5, 150.5, 145.1, 130.7, 124.0, 62.2, 60.6, 47.0, 26.5, 26.3, 13.9 ppm.

**HRMS** (ESI):  $m/z$ :  $[M+Na]^+$  Calcd. for C<sub>13</sub>H<sub>18</sub>N<sub>2</sub>O<sub>5</sub>SN<sup>+</sup>: 337.08286; Found: 337.08329.

### ethyl 2-(4-fluoro-*N*-isopropylphenylsulfonimidoyl)acetate (**3d**)

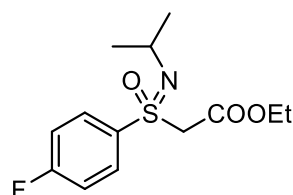

The title compound **3d** was synthesized according to the general procedure (**GP-2**) and was obtained after silica column chromatography (*n*-hexane : ethyl acetate 2:1) as a yellow oil (92%, 53 mg).

**<sup>1</sup>H NMR** (600 MHz, Chloroform-*d*):  $\delta$  = 7.97 – 7.92 (m, 2H), 7.24 – 7.17 (m, 2H), 4.13 (s, 2H), 4.13 – 4.06 (m, 2H), 3.56 – 3.47 (m, 1H), 1.22 (d,  $J$  = 6.3 Hz, 3H), 1.20 – 1.15 (m, 6H) ppm.

**<sup>13</sup>C NMR** (151 MHz, Chloroform-*d*):  $\delta$  = 165.6 (d,  $J$  = 255.0 Hz), 162.9, 134.7, 132.1 (d,  $J$  = 9.6 Hz), 116.1 (d,  $J$  = 22.5 Hz), 62.0, 60.6, 46.7, 26.6, 26.4, 13.8 ppm.

**<sup>19</sup>F NMR** (564 MHz, Chloroform-*d*):  $\delta$  = -105.04 (ddd,  $J$  = 13.4, 8.5, 5.1 Hz) ppm.

**HRMS** (ESI):  $m/z$ :  $[M+Na]^+$  Calcd. for  $C_{13}H_{18}NO_3FSNa^+$ : 310.08836; Found: 310.08804.

### ethyl 2-(4-chloro-*N*-isopropylphenylsulfonimidoyl)acetate (**3e**)

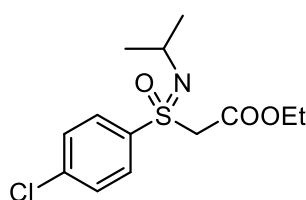

The title compound **3e** was synthesized according to the general procedure (**GP-2**) and was obtained after silica column (*n*-hexane : ethyl acetate 2:1) as a yellow oil (74%, 45 mg).

**<sup>1</sup>H NMR** (600 MHz, Chloroform-*d*):  $\delta$  = 7.87 (d,  $J$  = 8.6 Hz, 2H), 7.50 (d,  $J$  = 8.7 Hz, 2H), 4.13 (s, 2H), 4.13 – 4.06 (m, 2H), 3.55 – 3.45 (m, 1H), 1.21 (d,  $J$  = 6.3 Hz, 3H), 1.19 – 1.16 (m, 6H) ppm.

**<sup>13</sup>C NMR** (151 MHz, Chloroform-*d*):  $\delta$  = 162.8, 139.8, 137.4, 130.8, 129.2, 62.0, 60.7, 46.7, 26.6, 26.4, 13.8 ppm.

**HRMS** (ESI):  $m/z$ :  $[M-CH_3]^+$  Calcd. for  $C_{12}H_{15}NO_3ClS^+$ : 288.04612; Found: 288.04577.

### ethyl 2-(4-bromo-*N*-isopropylphenylsulfonimidoyl)acetate (**3f**)

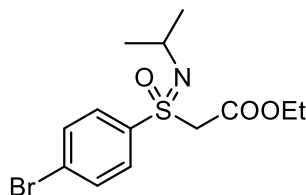

The title compound **3f** was synthesized according to the general procedure (**GP-2**) and was obtained after silica column chromatography (*n*-hexane : ethyl acetate 2:1) as a yellow oil (89%, 62 mg).

**<sup>1</sup>H NMR** (600 MHz, Chloroform-*d*):  $\delta$  = 7.82 – 7.78 (m, 2H), 7.69 – 7.65 (m, 2H), 4.13 (s, 2H), 4.12 – 4.08 (m, 2H), 3.54 – 3.45 (m, 1H), 1.21 (d,  $J$  = 6.3 Hz, 3H), 1.20 – 1.16 (m, 6H) ppm.

**<sup>13</sup>C NMR** (151 MHz, Chloroform-*d*):  $\delta$  = 162.8, 138.0, 132.2, 130.9, 128.4, 62.0, 60.6, 46.8, 26.6, 26.4, 13.9 ppm.

**HRMS** (ESI):  $m/z$ :  $[M+H]^+$  Calcd. for C<sub>13</sub>H<sub>19</sub>NO<sub>3</sub>BrS<sup>+</sup>: 348.02635; Found: 348.02515.

**ethyl 2-(*N*-isopropyl-3-methylphenylsulfonimidoyl)acetate (3g)**

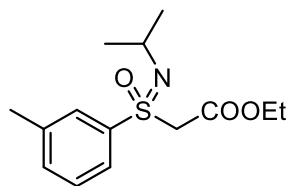

The title compound **3g** was synthesized according to the general procedure (**GP-3**) and was obtained after silica column chromatography (*n*-hexane : ethyl acetate 2:1) as a yellow oil (51%, 29 mg).

**<sup>1</sup>H NMR** (600 MHz, Chloroform-*d*):  $\delta$  = 7.76 – 7.71 (m, 2H), 7.43 – 7.39 (m, 2H), 4.13 (s, 2H), 4.12 – 4.05 (m, 2H), 3.57 – 3.49 (m, 1H), 2.43 (s, 3H), 1.23 (d,  $J$  = 6.3 Hz, 3H), 1.19 (d,  $J$  = 6.3 Hz, 3H), 1.15 (t,  $J$  = 7.2 Hz, 3H) ppm.

**<sup>13</sup>C NMR** (151 MHz, Chloroform-*d*):  $\delta$  = 163.0, 139.1, 138.7, 133.9, 129.5, 128.8, 126.3, 61.8, 60.6, 46.7, 26.6, 26.5, 21.3, 13.8 ppm.

**HRMS** (ESI):  $m/z$ :  $[M+Na]^+$  Calcd. for C<sub>14</sub>H<sub>21</sub>NO<sub>3</sub>SN<sup>+</sup>: 306.11344; Found: 306.11244.

**ethyl 2-(*N*-isopropyl-3-methoxyphenylsulfonimidoyl)acetate (3h)**

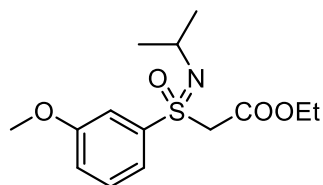

The title compound **3h** was synthesized according to the general procedure (**GP-2**) and was obtained after silica column chromatography (*n*-hexane : ethyl acetate 1:1) as a yellow oil (83%, 50 mg).

**<sup>1</sup>H NMR** (600 MHz, Chloroform-*d*):  $\delta$  = 7.52 – 7.50 (m, 1H), 7.46 – 7.41 (m, 2H), 7.14 – 7.12 (m, 1H), 4.13 (s, 2H), 4.13 – 4.04 (m, 2H), 3.86 (s, 3H), 3.56 – 3.46 (m, 1H), 1.22 (d,  $J$  = 6.3 Hz, 3H), 1.20 – 1.15 (m, 6H) ppm.

**<sup>13</sup>C NMR** (151 MHz, Chloroform-*d*):  $\delta$  = 162.9, 159.9, 140.2, 129.9, 121.3, 119.5, 113.8, 61.9, 60.8, 55.6, 46.7, 26.7, 26.4, 13.8 ppm.

**HRMS** (ESI):  $m/z$ :  $[M+Na]^+$  Calcd. for  $C_{14}H_{21}NO_4SNa^+$ : 322.10835; Found: 322.10701.

**ethyl 2-(3-fluoro-*N*-isopropylphenylsulfonimidoyl)acetate (3i)**

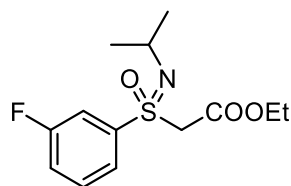

The title compound **3i** was synthesized according to the general procedure (**GP-2**) and was obtained after silica column chromatography (*n*-hexane : ethyl acetate 2:1) as a yellow oil (38%, 22 mg).

**<sup>1</sup>H NMR** (600 MHz, Chloroform-*d*):  $\delta$  = 7.75 – 7.73 (m, 1H), 7.67 – 7.65 (m, 1H), 7.51 – 7.55 (m, 1H), 7.33 – 7.31 (m, 1H), 4.15 (s, 2H), 4.14 – 4.07 (m, 2H), 3.56 – 3.48 (m, 1H), 1.23 (d,  $J$  = 6.3 Hz, 3H), 1.20 – 1.16 (m, 6H) ppm.

**<sup>13</sup>C NMR** (151 MHz, Chloroform-*d*):  $\delta$  = 162.7, 162.4 (d,  $J$  = 251.3 Hz), 141.3 (d,  $J$  = 6.4 Hz), 130.6 (d,  $J$  = 7.6 Hz), 124.9 (d,  $J$  = 3.4 Hz), 120.3 (d,  $J$  = 21.3 Hz), 116.7 (d,  $J$  = 24.2 Hz), 62.0, 60.7, 46.8, 26.6, 26.4, 13.8 ppm.

**<sup>19</sup>F NMR** (564 MHz, Chloroform-*d*):  $\delta$  = -109.95 (td,  $J$  = 8.2, 5.3 Hz) ppm.

**HRMS** (ESI):  $m/z$ :  $[M+Na]^+$  Calcd. for  $C_{13}H_{18}NO_3SFNa^+$ : 310.08836; Found: 310.08752.

**ethyl 2-(3-chloro-*N*-isopropylphenylsulfonimidoyl)acetate (3j)**

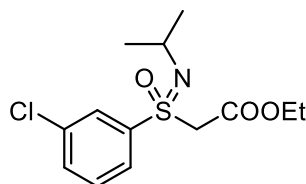

The title compound **3j** was synthesized according to the general procedure (**GP-2**) and was obtained after silica column chromatography (*n*-hexane : ethyl acetate 2:1) as a yellow oil (69%, 41 mg).

**<sup>1</sup>H NMR** (600 MHz, Chloroform-*d*):  $\delta$  = 7.94 (t, *J* = 1.9 Hz, 1H), 7.83 (dt, *J* = 7.9, 1.4 Hz, 1H), 7.59 – 7.58 (m, 1H), 7.50 – 7.47 (m, 1H), 4.14 (s, 2H), 4.14 – 4.06 (m, 2H), 3.56 – 3.48 (m, 1H), 1.23 (d, *J* = 6.3 Hz, 3H), 1.21 – 1.15 (m, 6H) ppm.

**<sup>13</sup>C NMR** (151 MHz, Chloroform-*d*):  $\delta$  = 162.7, 140.8, 135.2, 133.2, 130.1, 129.4, 127.3, 62.1, 60.7, 46.8, 26.6, 26.4, 13.8 ppm.

**HRMS** (ESI): *m/z*: [M+H]<sup>+</sup> Calcd. for C<sub>13</sub>H<sub>19</sub>NO<sub>3</sub>ClS<sup>+</sup>: 304.07687; Found: 304.07623.

**ethyl (*E*)-2-(*N*-isopropyl-2-phenylvinylsulfonimidoyl)acetate (3k)**

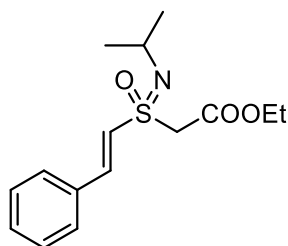

The title compound **3k** was synthesized according to the general procedure (**GP-2**) and was obtained after silica column chromatography (*n*-hexane : ethyl acetate 2:1) as a yellow oil. (47%, 28 mg).

**<sup>1</sup>H NMR** (600 MHz, Chloroform-*d*):  $\delta$  = 7.56 (d, *J* = 15.5 Hz, 1H), 7.53 (dd, *J* = 7.4, 2.1 Hz, 2H), 7.44 – 7.38 (m, 3H), 7.01 (d, *J* = 15.4 Hz, 1H), 4.23 (q, *J* = 7.2 Hz, 2H), 4.18 – 4.07 (m, 2H), 3.68 – 3.60 (m, 1H), 1.28 (t, *J* = 7.2 Hz, 3H), 1.21 (t, *J* = 6.0 Hz, 6H) ppm.

**<sup>13</sup>C NMR** (151 MHz, Chloroform-*d*):  $\delta$  = 163.5, 159.0, 144.4, 132.6, 130.9, 129.0, 128.5, 125.6, 62.0, 59.5, 46.5, 41.9, 26.7, 26.5, 22.3, 14.0 ppm.

**HRMS** (ESI): *m/z*: [M+H]<sup>+</sup> Calcd. for C<sub>15</sub>H<sub>22</sub>NO<sub>3</sub>S<sup>+</sup>: 296.13149; Found: 296.13078.

**ethyl 2-(*N*-isopropylthiophene-2-sulfonimidoyl)acetate (3l)**

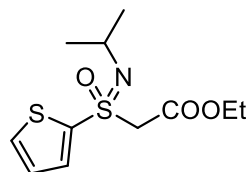

The title compound **3l** was synthesized according to the general procedure (**GP-2**) and was obtained after silica column chromatography (*n*-hexane : ethyl acetate 2:1) as a yellow oil (43%, 24 mg).

**<sup>1</sup>H NMR** (600 MHz, Chloroform-*d*):  $\delta$  = 7.70 (dd,  $J$  = 5.0, 1.2 Hz, 1H), 7.61 (dd,  $J$  = 3.8, 1.3 Hz, 1H), 7.17 – 7.12 (m, 1H), 4.26 – 4.19 (m, 2H), 4.19 – 4.10 (m, 2H), 3.60 – 3.51 (m, 1H), 1.25 – 1.20 (m, 6H), 1.17 (d,  $J$  = 6.3 Hz, 3H) ppm.

**<sup>13</sup>C NMR** (151 MHz, Chloroform-*d*):  $\delta$  = 162.7, 140.4, 134.7, 134.3, 127.8, 62.6, 62.1, 47.0, 26.7, 26.2, 13.9 ppm.

**HRMS** (ESI):  $m/z$ :  $[M+Na]^+$  Calcd. for  $C_{11}H_{17}NO_3S_2Na^+$ : 398.05421; Found: 298.05351.

**ethyl 2-(*N*-isopropyl-4-(5-methyl-3-phenylisoxazol-4-yl)phenylsulfonimidoyl)acetate (3m)**

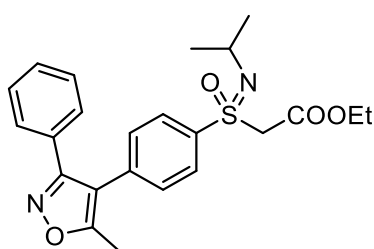

The title compound **3m** was synthesized according to the general procedure (**GP-2**) and was obtained after silica column chromatography (n-hexane : ethyl acetate 1:1) as a yellow oil (42%, 36 mg).

**<sup>1</sup>H NMR** (600 MHz, Chloroform-*d*):  $\delta$  = 7.95 (d,  $J$  = 8.4 Hz, 2H), 7.42 – 7.36 (m, 3H), 7.35 – 7.31 (m, 4H), 4.18 (s, 2H), 4.12 – 4.08 (m, 2H), 3.64 – 3.57 (m, 1H), 2.49 (s, 3H), 1.25 (d,  $J$  = 6.3 Hz, 3H), 1.22 (d,  $J$  = 6.3 Hz, 3H), 1.17 (t,  $J$  = 7.1 Hz, 3H) ppm.

**<sup>13</sup>C NMR** (151 MHz, Chloroform-*d*):  $\delta$  = 163.0, 161.1, 138.1, 135.7, 130.1, 129.6, 129.6, 128.6, 128.4, 114.5, 61.9, 60.3, 46.8, 26.6, 26.5, 13.9, 11.7 ppm.

**HRMS** (ESI):  $m/z$ :  $[M+H]^+$  Calcd. for  $C_{23}H_{27}N_2O_4S^+$ : 427.16860; Found: 427.16816.

**ethyl 2-(*N*-isopropyl-4-methylphenylsulfonimidoyl)acetate (3n)**

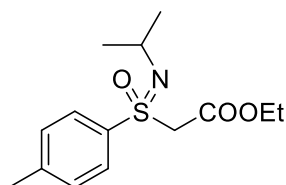

The title compound **3n** was synthesized according to the general procedure (**GP-2**) and was obtained after silica column chromatography (n-hexane : ethyl acetate 2:1) as a yellow oil (92%, 52 mg).



**<sup>1</sup>H NMR** (600 MHz, Chloroform-*d*):  $\delta$  = 7.81 (d,  $J$  = 8.3 Hz, 2H), 7.33 (d,  $J$  = 8.0 Hz, 2H), 4.13 (s, 2H), 4.12 – 4.05 (m, 2H), 3.55 – 3.45 (m, 1H), 2.43 (s, 3H), 1.22 (d,  $J$  = 6.3 Hz, 3H), 1.19 – 1.15 (m, 6H) ppm.

**<sup>13</sup>C NMR** (151 MHz, Chloroform-*d*):  $\delta$  = 163.1, 144.0, 135.7, 129.6, 129.3, 61.9, 60.7, 46.6, 26.7, 26.4, 21.5, 13.8 ppm.

**HRMS** (ESI):  $m/z$ :  $[M+Na]^+$  Calcd. for  $C_{14}H_{21}NO_3SNa^+$ : 306.11344; Found: 306.11287.

**ethyl 2-(4-methyl-*N*-(2,2,2-trifluoroethyl)phenylsulfonimidoyl)acetate (3o)**

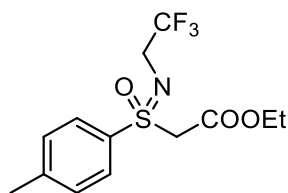

The title compound **3o** was synthesized according to the general procedure (**GP-2**) and was obtained after silica column chromatography (n-hexane : ethyl acetate 2:1) as a yellow oil (49%, 30 mg).

**<sup>1</sup>H NMR** (600 MHz, Chloroform-*d*):  $\delta$  = 7.81 (d,  $J$  = 8.2 Hz, 2H), 7.38 (d,  $J$  = 7.7 Hz, 2H), 4.18 (s, 2H), 4.18 – 4.09 (m, 2H), 3.59 – 3.66 (m, 1H), 3.47 – 3.53 (m, 1H), 2.46 (s, 3H), 1.20 (t,  $J$  = 7.2 Hz, 3H) ppm.

**<sup>13</sup>C NMR** (151 MHz, Chloroform-*d*):  $\delta$  = 162.4, 145.0, 133.9, 130.0, 129.3, 125.18 (q,  $J$  = 278.0 Hz), 62.3, 61.2, 45.18 (q,  $J$  = 34.0 Hz), 44.8, 21.6, 13.8 ppm.

**<sup>19</sup>F NMR** (564 MHz, Chloroform-*d*):  $\delta$  = -72.57 (t,  $J$  = 9.2 Hz) ppm.

**HRMS** (ESI):  $m/z$ :  $[M+Na]^+$  Calcd. for  $C_{13}H_{16}NO_3F_3SNa^+$ : 346.06952; Found: 346.06899.

**ethyl 2-(*N*-(cyclopropylmethyl)-4-methylphenylsulfonimidoyl)acetate (3p)**

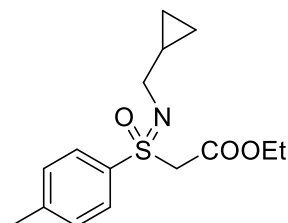

The title compound **3p** was synthesized according to the general procedure (**GP-2**) and was obtained after silica column chromatography (n-hexane : ethyl acetate 2:1) as a yellow oil (91%, 51 mg).

**<sup>1</sup>H NMR** (600 MHz, Chloroform-*d*):  $\delta$  = 7.81 (d,  $J$  = 8.3 Hz, 2H), 7.33 (d,  $J$  = 8.0 Hz, 2H), 4.17 – 4.13 (m, 2H), 4.13 – 4.06 (m, 2H), 3.02 – 2.91 (m, 2H), 2.43 (s, 3H), 1.17 (t,  $J$  = 7.1 Hz, 2H), 1.05 – 1.03 (m, 1H), 0.48 – 0.44 (m, 2H), 0.23 – 0.12 (m, 2H) ppm.

**<sup>13</sup>C NMR** (151 MHz, Chloroform-*d*):  $\delta$  = 163.0, 144.1, 135.3, 129.7, 129.3, 61.9, 60.8, 48.7, 21.5, 13.8, 13.3, 3.8, 3.7 ppm.

**HRMS** (ESI):  $m/z$ :  $[M+Na]^+$  Calcd. for  $C_{15}H_{21}NO_3SNa^+$ : 318.11344; Found: 318.11315.

**ethyl 2-(*N*-cyclohexyl-4-methylphenylsulfonimidoyl)acetate (3q)**

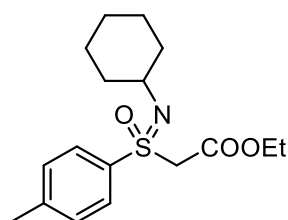

The title compound **3q** was synthesized according to the general procedure (**GP-2**) and was obtained after silica column chromatography (n-hexane : ethyl acetate 2:1) as a yellow oil (89%, 55 mg).

**<sup>1</sup>H NMR** (600 MHz, Chloroform-*d*):  $\delta$  = 7.81 (d,  $J$  = 8.3 Hz, 2H), 7.32 (d,  $J$  = 8.1 Hz, 2H), 4.13 – 4.10 (m, 2H), 4.10 – 4.05 (m, 2H), 3.18 – 3.09 (m, 1H), 2.43 (s, 3H), 1.89 – 1.78 (m, 2H), 1.74 – 1.65 (m, 2H), 1.55 – 1.48 (m, 1H), 1.48 – 1.34 (m, 2H), 1.28 – 1.18 (m, 3H), 1.16 (t,  $J$  = 7.1 Hz, 3H) ppm.

**<sup>13</sup>C NMR** (151 MHz, Chloroform-*d*):  $\delta$  = 163.1, 143.9, 136.0, 129.6, 129.3, 61.8, 60.9, 54.2, 37.0, 36.7, 25.6, 25.2, 25.1, 21.5, 13.8 ppm.

**HRMS** (ESI):  $m/z$ :  $[M+Na]^+$  Calcd. for  $C_{17}H_{25}NO_3SNa^+$ : 346.14474; Found: 346.14452.

**ethyl 2-(*N*-benzyl-4-methylphenylsulfonimidoyl)acetate (3r)**

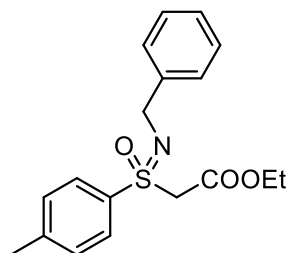

The title compound **3r** was synthesized according to the general procedure (**GP-2**) and was obtained after silica column chromatography (n-hexane : ethyl acetate 2:1) as a yellow solid (51%, 34 mg).

**<sup>1</sup>H NMR** (600 MHz, Chloroform-*d*):  $\delta$  = 7.85 (d,  $J$  = 8.3 Hz, 2H), 7.42 – 7.38 (m, 2H), 7.34 (d,  $J$  = 8.2 Hz, 2H), 7.30 (t,  $J$  = 7.6 Hz, 2H), 7.21 (t,  $J$  = 7.3 Hz, 1H), 4.37 – 4.22 (m, 2H), 4.18 (s, 2H), 4.10 (q,  $J$  = 7.2 Hz, 2H), 2.44 (s, 3H), 1.16 (t,  $J$  = 7.1 Hz, 3H) ppm.

**<sup>13</sup>C NMR** (151 MHz, Chloroform-*d*):  $\delta$  = 162.9, 144.3, 141.0, 134.9, 129.8, 129.3, 128.2, 127.3, 126.5, 62.0, 60.9, 47.0, 21.6, 13.8 ppm.

**HRMS** (ESI):  $m/z$ :  $[M+K]^+$  Calcd. for  $C_{18}H_{21}NO_3SK^+$ : 370.08737; Found: 370.08739.

**ethyl 2-(4-methyl-*N*-phenethylphenylsulfonimidoyl)acetate (3s)**

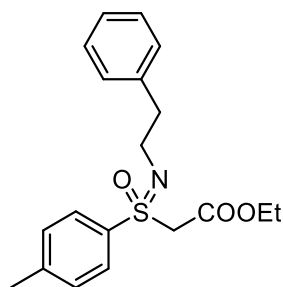

The title compound **3s** was synthesized according to the general procedure (**GP-2**) and was obtained after silica column chromatography (n-hexane : ethyl acetate 2:1) as a yellow oil (91%, 63 mg).

**<sup>1</sup>H NMR** (600 MHz, Chloroform-*d*):  $\delta$  = 7.70 (d,  $J$  = 8.3 Hz, 2H), 7.30 (d,  $J$  = 8.0 Hz, 2H), 7.27 – 7.24 (m, 2H), 7.21 (d,  $J$  = 6.6 Hz, 2H), 7.22 – 7.19 (m, 1H), 4.12 – 3.99 (m, 4H), 3.37 – 3.22 (m, 2H), 2.94 – 2.88 (m, 2H), 2.43 (s, 3H), 1.16 (t,  $J$  = 7.1 Hz, 3H) ppm.

**<sup>13</sup>C NMR** (151 MHz, Chloroform-*d*):  $\delta$  = 162.9, 144.1, 140.3, 134.9, 129.7, 129.3, 129.0, 128.2, 126.0, 61.9, 60.5, 45.6, 39.3, 21.5, 13.8 ppm.

**HRMS** (ESI):  $m/z$ :  $[M+Na]^+$  Calcd. for  $C_{19}H_{23}NO_3SNa^+$ : 368.12909; Found: 368.12959.

**ethyl 2-(4-methyl-*N*-(2-(pyridin-2-yl)ethyl)phenylsulfonimidoyl)acetate (3t)**

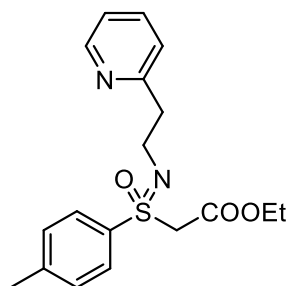

The title compound **3t** was synthesized according to the general procedure (**GP-2**) and was obtained after silica column chromatography (n-hexane : ethyl acetate 1:4) as a yellow oil (23%, 16 mg).

**<sup>1</sup>H NMR** (600 MHz, Chloroform-*d*):  $\delta$  = 8.51 (d,  $J$  = 4.5 Hz, 1H), 7.69 (d,  $J$  = 8.2 Hz, 2H), 7.60 – 7.57 (m, 1H), 7.29 (d,  $J$  = 8.0 Hz, 2H), 7.24 (s, 1H), 7.12 – 7.10 (m, 1H), 4.13 – 3.99 (m, 4H), 3.54 – 3.41 (m, 2H), 3.08 (td,  $J$  = 7.1, 1.6 Hz, 2H), 2.42 (s, 3H), 1.15 (t,  $J$  = 7.1 Hz, 3H) ppm.

**<sup>13</sup>C NMR** (151 MHz, Chloroform-*d*):  $\delta$  = 162.9, 160.3, 149.1, 144.2, 136.0, 129.7, 129.3, 123.8, 121.1, 64.6, 61.9, 60.5, 43.8, 41.3, 21.5, 13.8 ppm.

**HRMS** (ESI):  $m/z$ :  $[M+Na]^+$  Calcd. for  $C_{18}H_{22}N_2O_3SNa^+$ : 369.12433; Found: 369.12482.

#### ethyl 2-(*N*-(2-methoxyethyl)-4-methylphenylsulfonimidoyl)acetate (**3u**)

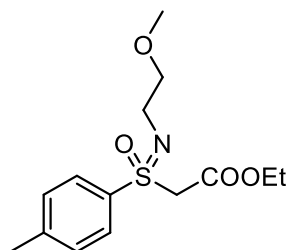

The title compound **3u** was synthesized according to the general procedure (**GP-2**) and was obtained after silica column chromatography (n-hexane : ethyl acetate 1:1) as a yellow oil (81%, 46 mg).

**<sup>1</sup>H NMR** (600 MHz, Chloroform-*d*):  $\delta$  = 7.82 (d,  $J$  = 8.3 Hz, 2H), 7.34 (d,  $J$  = 8.0 Hz, 2H), 4.20 – 4.13 (m, 2H), 4.13 – 4.07 (m, 2H), 3.54 – 3.51 (m, 2H), 3.36 (s, 3H), 3.33 – 3.20 (m, 2H), 2.43 (s, 3H), 1.16 (t,  $J$  = 7.1 Hz, 3H) ppm.

**<sup>13</sup>C NMR** (151 MHz, Chloroform-*d*):  $\delta$  = 163.0, 144.2, 134.9, 129.7, 129.3, 74.0, 61.9, 60.7, 58.8, 43.4, 21.5, 13.8 ppm.

**HRMS** (ESI):  $m/z$ :  $[M+Na]^+$  Calcd. for  $C_{14}H_{21}NO_4SNa^+$ : 322.10835; Found: 322.10809.

**Ethyl 3-(((2-ethoxy-2-oxoethyl)(oxo)(*p*-tolyl)- $\lambda^6$ -sulfaneylidene)amino)propanoate (3v)**

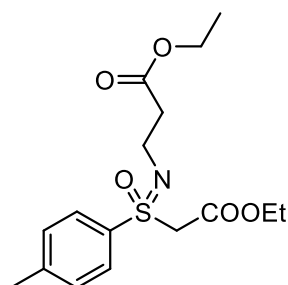

The title compound **3v** was synthesized according to the general procedure (**GP-2**) and was obtained after silica column chromatography (n-hexane : ethyl acetate 1:1) as a yellow oil (80%, 53 mg).

**<sup>1</sup>H NMR** (600 MHz, Chloroform-*d*):  $\delta$  = 7.79 (d,  $J$  = 8.3 Hz, 2H), 7.33 (d,  $J$  = 7.8 Hz, 2H), 4.17 – 4.05 (m, 6H), 3.43 – 3.31 (m, 2H), 2.60 – 2.57 (m, 2H), 2.43 (s, 3H), 1.24 (t,  $J$  = 7.1 Hz, 3H), 1.16 (t,  $J$  = 7.2 Hz, 3H) ppm.

**<sup>13</sup>C NMR** (151 MHz, Chloroform-*d*):  $\delta$  = 172.3, 162.9, 144.3, 134.9, 129.7, 129.3, 61.9, 60.4, 60.2, 39.6, 37.6, 21.5, 14.2, 13.8 ppm.

**HRMS** (ESI):  $m/z$ :  $[M+Na]^+$  Calcd. for  $C_{16}H_{23}NO_5SNa^+$ : 364.11891; Found: 364.11777.

**Ethyl 2-(*N*-(2-(((*tert*-butoxycarbonyl)amino)ethyl)-4-methylphenylsulfonimidoyl)acetate (3w)**

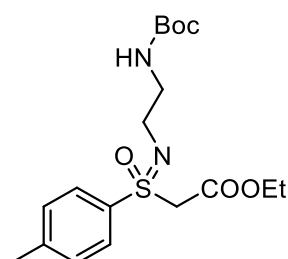

The title compound **3w** was synthesized according to the general procedure (**GP-2**) and was obtained after silica column chromatography (n-hexane : ethyl acetate 2:1) as a yellow oil (73%, 54 mg).

**<sup>1</sup>H NMR** (600 MHz, Chloroform-*d*):  $\delta$  = 7.79 (d,  $J$  = 8.3 Hz, 2H), 7.34 (d,  $J$  = 7.8 Hz, 2H), 5.16 (s, 1H), 4.16 – 4.07 (m, 4H), 3.28 (t,  $J$  = 5.7 Hz, 2H), 3.17 (t,  $J$  = 5.6 Hz, 2H), 2.44 (s, 3H), 1.43 (s, 9H), 1.17 (t,  $J$  = 7.1 Hz, 3H) ppm.

**<sup>13</sup>C NMR** (151 MHz, Chloroform-*d*):  $\delta$  = 162.8, 156.0, 144.5, 134.6, 129.8, 129.2, 62.0, 60.6, 43.8, 42.4, 28.4, 21.5, 13.8 ppm.

**HRMS** (ESI): *m/z*: [M+Na]<sup>+</sup> Calcd. for C<sub>18</sub>H<sub>28</sub>N<sub>2</sub>O<sub>5</sub>SNa<sup>+</sup>: 407.16111; Found: 407.16055.

**ethyl 2-(4-methyl-N-(2-((p-tolylsulfinyl)amino)ethyl)phenylsulfonimidoyl)acetate (3x)**

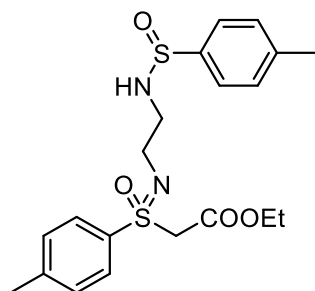

The title compound **3x** was synthesized according to the general procedure (**GP-2**) and was obtained after silica column chromatography (n-hexane : ethyl acetate 1:4) as a yellow oil (27%, 23 mg).

**<sup>1</sup>H NMR** (600 MHz, Chloroform-*d*):  $\delta$  = 7.81 (d, *J* = 8.3 Hz, 2H), 7.79 (d, *J* = 8.3 Hz, 2H), 7.60 (d, *J* = 8.2 Hz, 2H), 7.58 (d, *J* = 8.2 Hz, 2H), 7.34 (dd, *J* = 8.1, 5.2 Hz, 4H), 7.30 – 7.26 (m, 3H), 5.00 (t, *J* = 5.9 Hz, 2H), 4.23 – 4.10 (m, 2H), 4.10 – 4.02 (m, 2H), 3.31 – 3.16 (m, 3H), 2.99 – 2.82 (m, 1H), 2.44 (d, *J* = 3.4 Hz, 6H), 2.40 (s, 3H), 2.39 (s, 3H), 1.16 – 1.12 (m, 6H) ppm.

**<sup>13</sup>C NMR** (151 MHz, Chloroform-*d*):  $\delta$  = 144.5, 140.9, 129.87, 129.83, 129.49, 129.46, 129.3, 129.2, 126.1, 126.1, 62.1, 62.0, 60.3, 60.1, 44.8, 44.5, 42.9, 42.4, 21.6, 21.3, 13.8 ppm.

**HRMS** (ESI): *m/z*: [M+Na]<sup>+</sup> Calcd. for C<sub>20</sub>H<sub>26</sub>N<sub>2</sub>O<sub>4</sub>S<sub>2</sub>Na<sup>+</sup>: 445.12262; Found: 445.12232.

**benzhydryl(isopropylimino)(phenyl)-λ<sup>6</sup>-sulfanone (3y)**

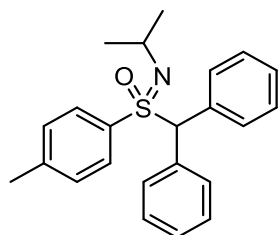

The title compound **3y** was synthesized according to the general procedure (**GP-2**) and was obtained after silica column chromatography (n-hexane : ethyl acetate 4:1) as a yellow oil (67%, 49 mg).

**<sup>1</sup>H NMR** (600 MHz, Chloroform-*d*):  $\delta$  = 7.49 (d, *J* = 7.1 Hz, 2H), 7.37 – 7.30 (m, 4H), 7.29 – 7.24 (m, 1H), 7.24 – 7.17 (m, 3H), 7.10 (d, *J* = 7.9 Hz, 2H), 7.05 (d, *J* = 7.1 Hz, 2H), 5.78 (s, 1H), 3.80 – 3.68 (m, 1H), 2.31 (s, 3H), 1.26 – 1.22 (m, 3H), 1.09 (d, *J* = 6.6 Hz, 3H) ppm.

**<sup>13</sup>C NMR** (151 MHz, Chloroform-*d*):  $\delta$  = 141.8, 141.0, 140.5, 140.4, 129.9, 129.1, 128.6, 128.1, 128.0, 127.2, 126.9, 126.1, 62.3, 48.8, 29.6, 23.3, 21.2 ppm.

**HRMS** (ESI): *m/z*: [M+Na]<sup>+</sup> Calcd. for C<sub>23</sub>H<sub>25</sub>NOSNa<sup>+</sup>: 386.15491; Found: 386.15393.

**methyl 2-(*N*-isopropyl-4-methylphenylsulfonimidoyl)-2-phenylacetate (**3z**)**

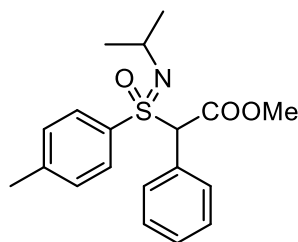

The title compound **3z** (1 : 1 mixture of two diastereoisomers) was synthesized according to the general procedure (**GP-2**) and was obtained after silica column chromatography (n-hexane : ethyl acetate 2:1) as a yellow oil (88%, 61 mg).

**<sup>1</sup>H NMR** (600 MHz, Chloroform-*d*):  $\delta$  = 7.44 (d, *J* = 8.3 Hz, 2H), 7.35 (d, *J* = 8.3 Hz, 2H), 7.31 – 7.26 (m, 2H), 7.27 – 7.22 (m, 4H), 7.22 – 7.15 (m, 6H), 7.15 – 7.11 (m, 2H), 5.25 (s, 2H), 3.80 (s, 3H), 3.73 (s, 3H), 3.67 – 3.61 (m, 1H), 3.58 – 3.52 (m, 1H), 2.39 (s, 3H), 2.37 (s, 3H), 1.22 – 1.17 (m, 9H), 1.16 (d, *J* = 6.3 Hz, 3H) ppm.

**<sup>13</sup>C NMR** (151 MHz, Chloroform-*d*):  $\delta$  = 143.8, 143.7, 130.9, 130.4, 130.3, 129.0, 129.0, 128.9, 128.7, 128.0, 128.0, 75.5, 74.4, 52.8, 52.6, 46.9, 46.6, 26.7, 26.6, 26.6, 26.4, 21.5, 21.5 ppm.

**HRMS** (ESI): *m/z*: [M+Na]<sup>+</sup> Calcd. for C<sub>19</sub>H<sub>23</sub>NO<sub>3</sub>SN<sup>+</sup>: 368.12909; Found: 368.12789.

**(1*R*,2*S*,5*R*)-2-isopropyl-5-methylcyclohexyl 2-(*N*-isopropyl-4-methylphenylsulfonimidoyl)acetate (**3aa**)**

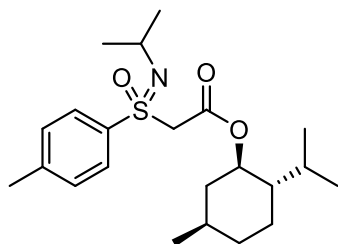

The title compound **3aa** was synthesized according to the general procedure (**GP-2**) and was obtained after silica column chromatography (n-hexane : ethyl acetate 4:1) as a yellow oil (1 : 1 mixture of two diastereoisomers) (57%, 45 mg).

**<sup>1</sup>H NMR** (600 MHz, Chloroform-*d*):  $\delta$  = 7.80 (dd,  $J$  = 8.3, 1.9 Hz, 2H), 7.32 (d,  $J$  = 8.0 Hz, 2H), 4.66 – 4.53 (m, 1H), 4.16 – 4.03 (m, 2H), 3.52 – 3.38 (m, 1H), 2.43 (s, 3H), 1.87 – 1.85 (m, 1H), 1.77 – 1.79 (m, 1H), 1.65 – 1.62 (m, 2H), 1.41 – 1.39 (m, 1H), 1.34 – 1.23 (m, 3H), 1.21 (d,  $J$  = 6.3 Hz, 3H), 1.16 (d,  $J$  = 6.3 Hz, 3H), 1.02 – 0.94 (m, 1H), 0.87 (dd,  $J$  = 6.6, 2.3 Hz, 3H), 0.83 (dd,  $J$  = 7.1, 1.9 Hz, 3H), 0.67 (dd,  $J$  = 7.0, 1.9 Hz, 3H) ppm.

**<sup>13</sup>C NMR** (151 MHz, Chloroform-*d*):  $\delta$  = 162.6, 143.9, 129.6, 129.4, 76.2, 60.96, 60.91, 46.6, 46.56, 46.53, 34.04, 34.01, 31.3, 31.2, 29.6, 26.78, 26.76, 26.4, 25.69, 25.67, 23.08, 23.06, 21.9, 21.5, 20.7, 16.0 ppm.

**HRMS** (ESI):  $m/z$ :  $[M+Na]^+$  Calcd. for  $C_{22}H_{35}NO_3SNa^+$ : 416.22299; Found: 416.22134.

**(2R)-4,7,7-trimethylbicyclo[2.2.1]heptan-2-yl 2-(N-isopropyl-4-methylphenylsulfonimidoyl)acetate (3ab)**

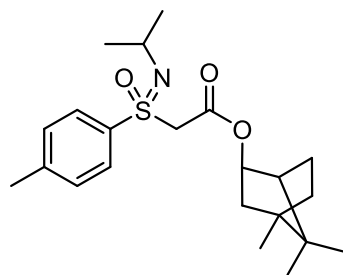

The title compound **3ab** was synthesized according to the general procedure (**GP-2**) and was obtained after silica column chromatography (n-hexane : ethyl acetate 4:1) as a yellow oil (1 : 1 mixture of two diastereoisomers) (36%, 28 mg).

**<sup>1</sup>H NMR** (600 MHz, Chloroform-*d*):  $\delta$  = 7.82 (d,  $J$  = 7.0 Hz, 2H), 7.33 (d,  $J$  = 6.8 Hz, 2H), 4.82 – 4.78 (m, 1H), 4.19 – 4.13 (m, 2H), 3.52 – 3.42 (m, 1H), 2.43 (s, 3H), 2.27 – 2.24 (m, 1H), 1.78 – 1.65 (m, 4H), 1.22 (dd,  $J$  = 6.3, 1.0 Hz, 3H), 1.16 (dd,  $J$  = 6.3,



2.3 Hz, 3H), 0.89 – 0.86 (m, 2H), 0.84 (dd,  $J = 4.9, 2.2$  Hz, 6H), 0.75 (d,  $J = 7.0$  Hz, 3H) ppm.

$^{13}\text{C}$  NMR (151 MHz, Chloroform- $d$ ):  $\delta = 163.4, 163.3, 143.9, 135.99, 135.91, 129.77, 129.75, 129.2, 82.0, 60.98, 60.94, 48.7, 47.85, 47.82, 46.6, 44.6, 36.2, 36.1, 27.8, 27.7, 26.88, 26.86, 26.81, 26.49, 26.47, 21.5, 19.66, 19.62, 18.8, 18.7, 13.38, 13.31$  ppm.

HRMS (ESI):  $m/z$ :  $[\text{M}+\text{H}]^+$  Calcd. for  $\text{C}_{22}\text{H}_{34}\text{NO}_3\text{S}^+$ : 392.22539; Found: 392.22443.

**8-hydroxy-3-(*N*-isopropyl-4-methylphenylsulfonimidoyl)-2H-chromen-2-one (4a)<sup>[4]</sup>**

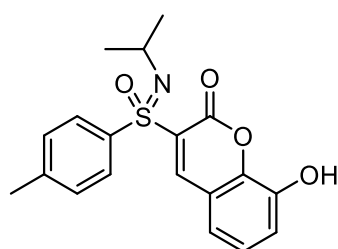

The title compound **4a** was synthesized according to the following procedure: **3a** (57 mg, 0.2 mmol, 1.0 equiv.), 2,3-dihydroxybenzaldehyde (28 mg, 0.2 mmol, 1.0 equiv.) and piperidine (9 mg, 0.1 mmol, 0.5 equiv.) was stirred in ethanol (5 mL) at 80°C for 6 h. After the reaction was completed, the solvent was evaporated under reduced pressure, and the crude product was obtained after silica column chromatography (n-hexane : ethyl acetate 1:4) as a yellow solid (84%, 60 mg).

$^1\text{H}$  NMR (600 MHz, DMSO- $d_6$ ):  $\delta = 10.39$  (s, 1H), 8.96 (s, 1H), 7.96 – 7.82 (m, 2H), 7.44 (d,  $J = 7.4$  Hz, 1H), 7.36 (d,  $J = 8.1$  Hz, 2H), 7.26 – 7.17 (m, 2H), 3.40 – 3.35 (m, 1H), 2.36 (s, 3H), 1.13 (d,  $J = 6.2$  Hz, 3H), 1.08 (d,  $J = 6.3$  Hz, 3H) ppm.

$^{13}\text{C}$  NMR (151 MHz, DMSO- $d_6$ ):  $\delta = 155.0, 150.6, 144.9, 143.9, 143.8, 135.9, 129.7, 129.6, 126.9, 125.5, 121.3, 121.0, 119.1, 46.5, 27.4, 26.6, 21.4$  ppm.

HRMS (ESI):  $m/z$ :  $[\text{M}+\text{Na}]^+$  Calcd. for  $\text{C}_{19}\text{H}_{19}\text{NO}_4\text{SNa}^+$ : 380.09270; Found: 380.09298.

**ethyl 2,2-dichloro-2-(*N*-isopropyl-4-methylphenylsulfonimidoyl)acetate (4b)<sup>[5]</sup>**

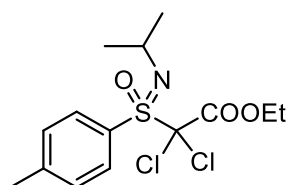

The title compound **4b** was synthesized according to the following procedure: **3a** (57 mg, 0.2 mmol, 1.0 equiv) and triethylamine (60 mg, 0.6, 3.0 equiv) in 2 mL of DCM was stirred for 20 min. N-chlorosuccinimide (80 mg, 0.6 mmol, 3.0 equiv) was added in to the reaction. The reaction was stirred at room temperature for 16 h. Then mixture was diluted with H<sub>2</sub>O (10 mL) and then extracted with EtOAc (3×10 mL). The organic layers were combined and washed with brine then dried with Na<sub>2</sub>SO<sub>4</sub>. The crude product was concentrated in vacuo and was obtained after silica column chromatography (n-hexane : ethyl acetate 4:1) as a yellow oil (64%, 45 mg).

<sup>1</sup>H NMR (600 MHz, Chloroform-*d*): δ = 7.89 (d, *J* = 8.4 Hz, 2H), 7.32 – 7.27 (m, 2H), 4.31 – 4.18 (m, 2H), 2.43 (s, 3H), 1.31 (d, *J* = 6.3 Hz, 3H), 1.28 (t, *J* = 7.2 Hz, 3H), 1.25 (d, *J* = 6.3 Hz, 3H) ppm.

<sup>13</sup>C NMR (151 MHz, Chloroform-*d*): δ = 162.9, 144.9, 131.6, 130.7, 129.0, 64.7, 47.3, 26.6, 25.6, 21.6, 13.6 ppm.

HRMS (ESI): *m/z*: [M+Na]<sup>+</sup> Calcd. for C<sub>14</sub>H<sub>19</sub>NO<sub>3</sub>SCl<sub>2</sub>Na<sup>+</sup>: 374.03549; Found: 374.03563.

#### ethyl 2-(*N*-isopropyl-4-methylphenylsulfonimidoyl)-3-phenylpropanoate (**4c**)<sup>[6]</sup>

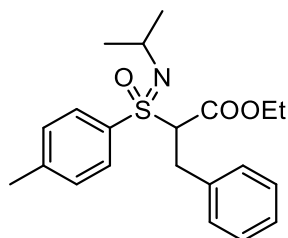

The title compound **4c** (1:1 mixture of two diastereoisomers) was synthesized according to the following procedure: To a stirred solution of the **3a** (57 mg, 0.2 mmol, 1.0 equiv), benzyl bromide (34 mg, 0.2 mmol, 1.0 equiv) and 18-crown-6 (21 mg, 0.08 mmol, 0.4 equiv) in acetone (2 mL) was added K<sub>2</sub>CO<sub>3</sub> (138 mg, 1.0 mmol, 5.0 equiv). The mixture was refluxed for 24 h. At the end, the reaction mixture was filtered and the acetone layer was concentrated. The residue obtained was extracted with chloroform, washed well with water, dried over anhydrous Na<sub>2</sub>SO<sub>4</sub>, filtered, and concentrated. The product was obtained after silica column chromatography (n-hexane : ethyl acetate 2:1) as a yellow oil (27%, 20 mg).

<sup>1</sup>H NMR (600 MHz, Chloroform-*d*): δ = 7.80 (t, *J* = 8.7 Hz, 4H), 7.37 – 7.32 (m, 4H), 7.23 – 7.21 (m, 4H), 7.20 – 7.15 (m, 2H), 7.12 – 7.09 (m, 2H), 7.08 – 7.03 (m, 2H), 4.33 (dd, *J* = 12.3, 3.3 Hz, 1H), 4.28 (dd, *J* = 12.2, 3.2 Hz, 1H), 4.08 (q, *J* = 7.1 Hz,

2H), 3.99 – 3.91 (m, 2H), 3.60 – 3.50 (m, 2H), 3.39 (dd,  $J = 13.5, 3.3$  Hz, 1H), 3.21 (dd,  $J = 13.6, 3.3$  Hz, 1H), 3.05 (dd,  $J = 13.6, 12.3$  Hz, 1H), 2.94 (t,  $J = 12.9$  Hz, 1H), 2.45 (s, 6H), 1.26 (d,  $J = 6.4$  Hz, 3H), 1.22 (dd,  $J = 6.3, 2.7$  Hz, 6H), 1.17 (d,  $J = 6.3$  Hz, 3H), 1.10 (t,  $J = 7.1$  Hz, 3H), 1.02 (t,  $J = 7.1$  Hz, 3H) ppm.

$^{13}\text{C}$  NMR (151 MHz, Chloroform-*d*):  $\delta = 166.3, 144.0, 130.6, 130.2, 129.5, 129.4, 128.8, 128.7, 128.6, 128.5, 126.95, 126.91, 71.8, 71.0, 61.7, 61.5, 46.6, 46.3, 34.2, 33.4, 26.89, 26.83, 26.6, 26.5, 21.5, 13.9, 13.7$  ppm.

HRMS (ESI):  $m/z$ :  $[\text{M}+\text{Na}]^+$  Calcd. for  $\text{C}_{21}\text{H}_{27}\text{NO}_3\text{SNa}^+$ : 396.16039; Found: 396.16065.

#### ethyl 2-(*N*-isopropyl-4-(phenylamino)phenylsulfonimidoyl)acetate (**4d**) <sup>[7]</sup>

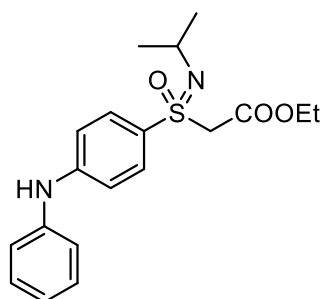

The title compound **4d** was synthesized according to the following procedure: **3a** (57 mg, 0.2 mmol, 1.0 equiv), Aniline (21 mg, 0.3 mmol, 1.5 equiv) and 1 mL of a solution containing 4CzIPN (0.8 mg, 0.001 mmol, 0.005 equiv) and  $\text{NiBr}_2\cdot\text{glyme}$  (3.2 mg, 0.01 mmol, 0.05 equiv) dissolved in DMA. The reaction mixture was then degassed and refilled with nitrogen two times via a syringe needle before tert-butylamine (27.3  $\mu\text{L}$ , 0.26 mmol, 1.3 equiv) was added via syringe. After degassing one more time and refilling with Argon, the reaction mixture was irradiated using a single blue LED (467 nm) for 16 h. After completion of the reaction, the reaction mixture was transferred to a separating funnel with ethyl acetate (10 mL) and was washed with 10 mL brine 5 times. The organic layers were dried over  $\text{Na}_2\text{SO}_4$ , filtered, and concentrated in vacuo. The product was obtained after silica column chromatography (n-hexane : ethyl acetate 1:1) as a yellow oil (89%, 64 mg).

$^1\text{H}$  NMR (600 MHz, Chloroform-*d*):  $\delta = 7.74$  (d,  $J = 8.8$  Hz, 2H), 7.38 – 7.31 (m, 2H), 7.18 – 7.17 (m, 2H), 7.08 – 7.11 (m, 1H), 7.03 (d,  $J = 8.8$  Hz, 2H), 6.16 (s, 1H), 4.17 – 4.05 (m, 4H), 3.56 – 3.48 (m, 1H), 1.22 (d,  $J = 6.3$  Hz, 3H), 1.21 – 1.18 (m, 6H) ppm.

**<sup>13</sup>C NMR** (151 MHz, Chloroform-*d*):  $\delta$  = 163.3, 148.5, 140.2, 131.3, 129.5, 127.6, 123.7, 121.0, 114.5, 61.8, 60.8, 46.5, 26.7, 26.5, 13.9 ppm.

**HRMS** (ESI): *m/z*: [M+Na]<sup>+</sup> Calcd. for C<sub>19</sub>H<sub>24</sub>N<sub>2</sub>O<sub>3</sub>SNa<sup>+</sup>: 383.13998; Found: 383.13980.

## 7. NMR data

### *N*-isopropyl-4-methylbenzenesulfonamide (1)

$^1\text{H}$  NMR (600 MHz, Chloroform-*d*)

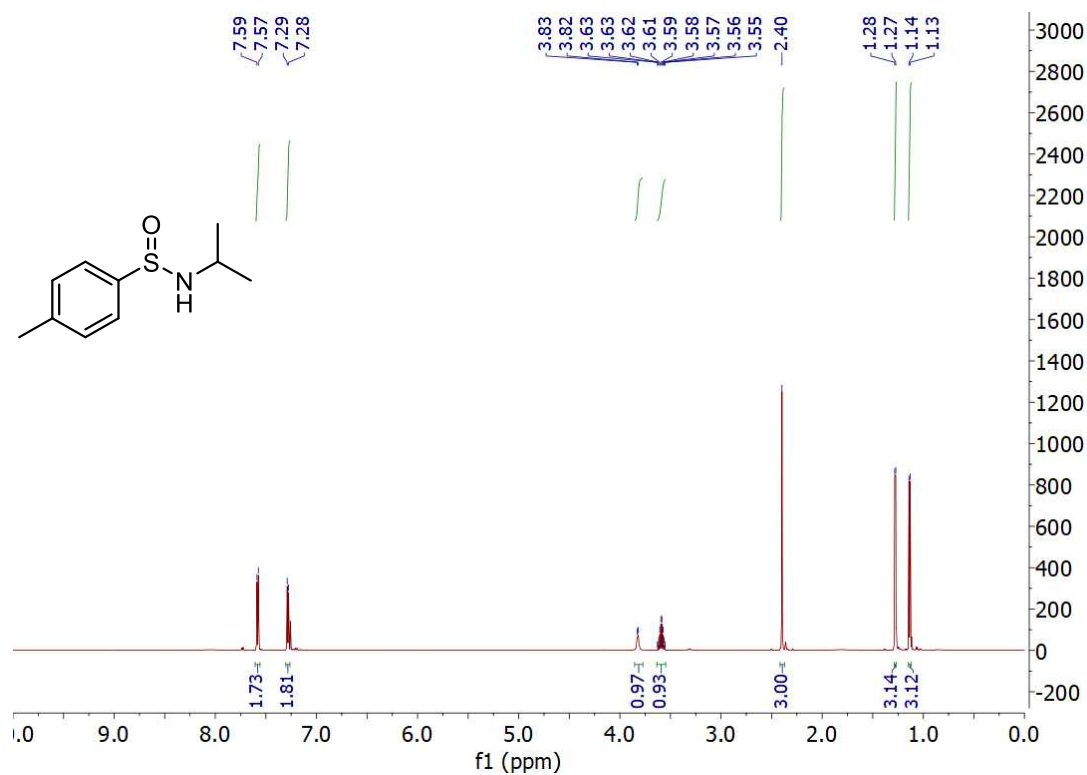

$^{13}\text{C}$  NMR (151 MHz, Chloroform-*d*)

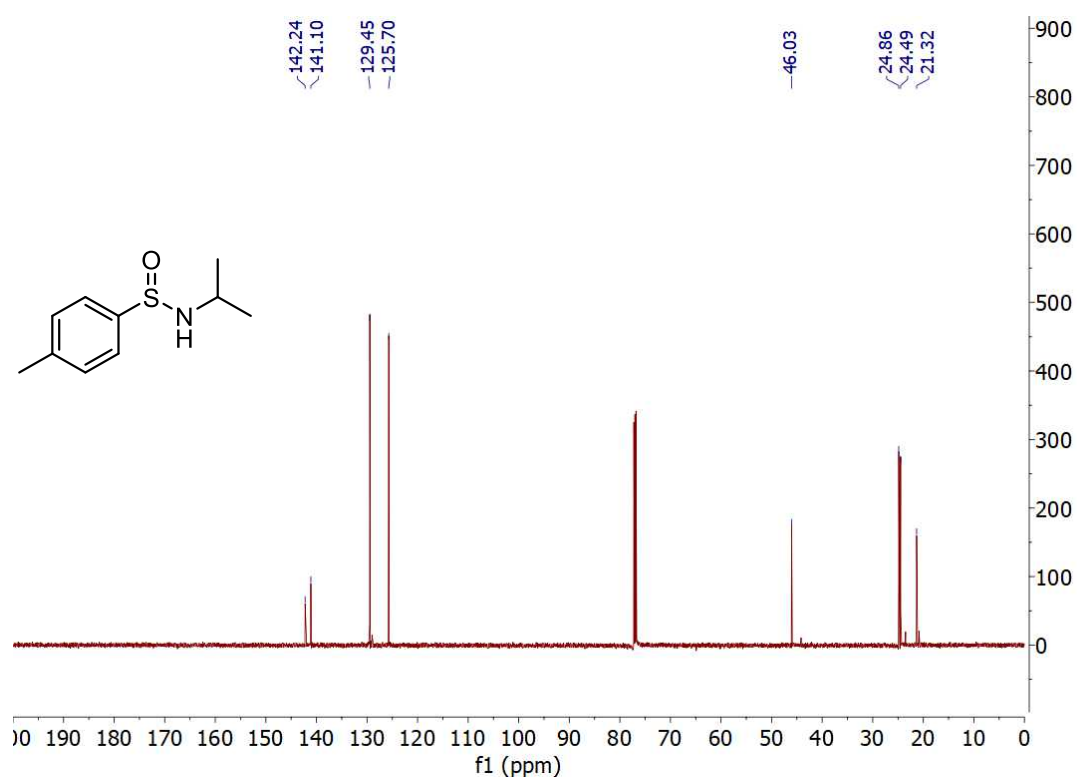

***N*-isopropyl-4-(5-methyl-3-phenylisoxazol-4-yl)benzenesulfonamide (1m)**

<sup>1</sup>H NMR (600 MHz, Chloroform-*d*)

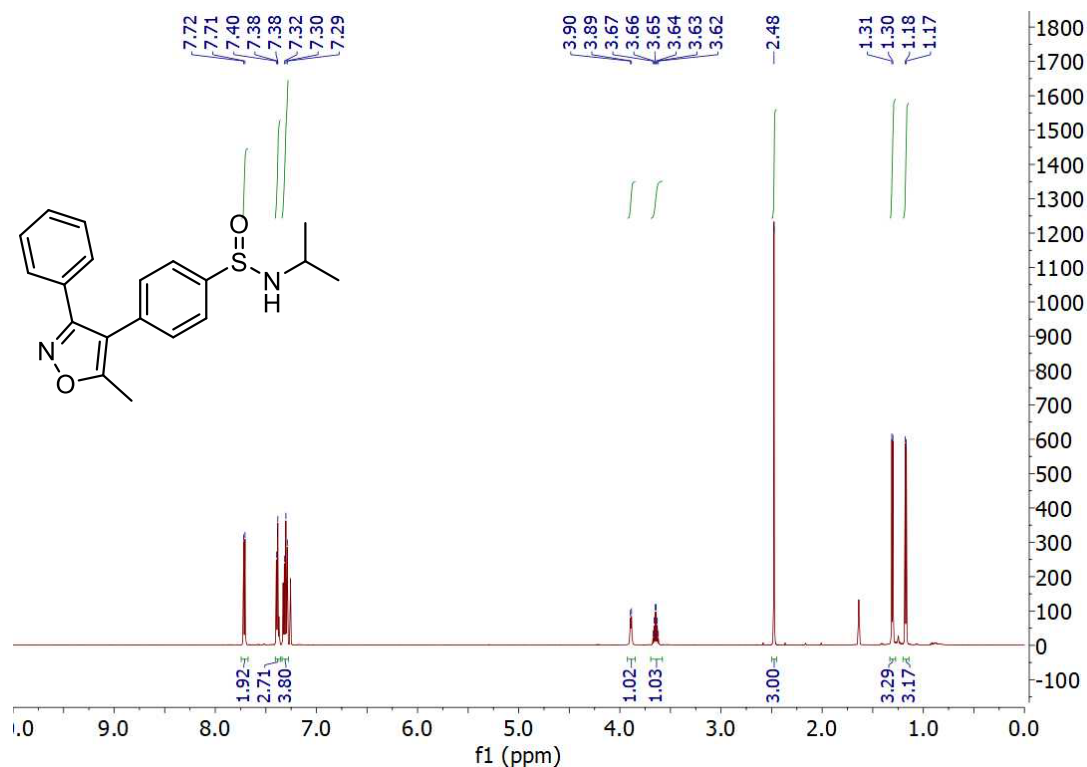

<sup>13</sup>C NMR (151 MHz, Chloroform-*d*)

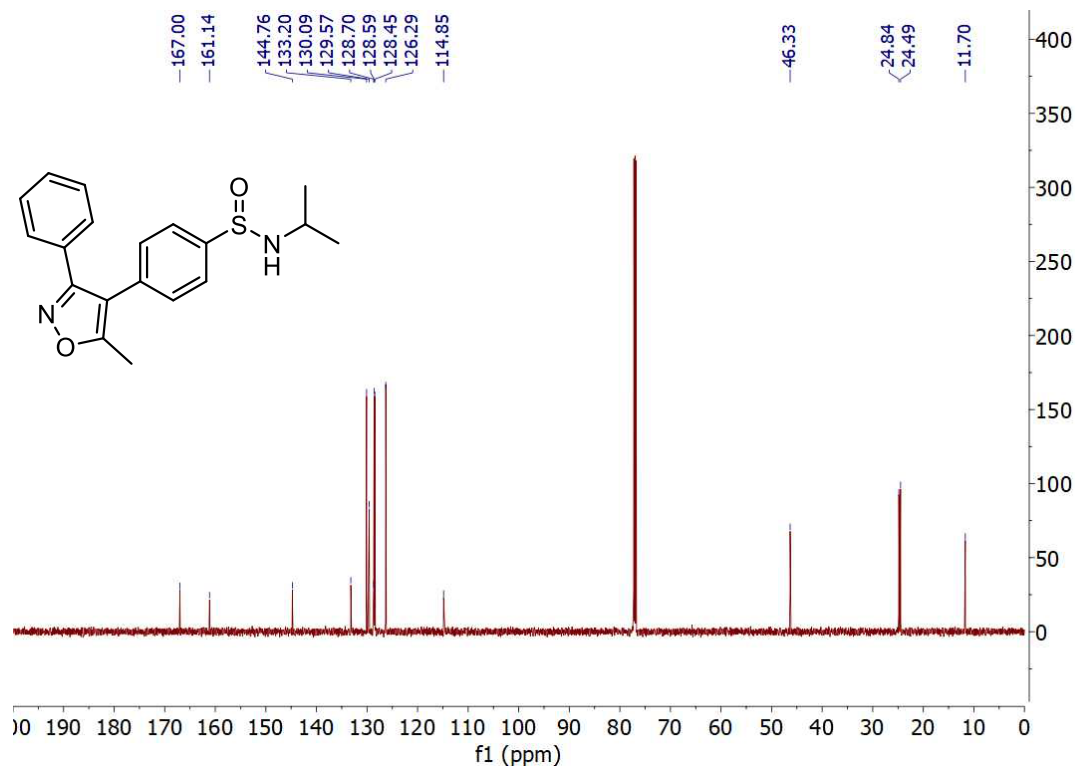

ethyl 2-(*N*-isopropyl-4-methoxyphenylsulfonimidoyl)acetate (3a)

$^1\text{H}$  NMR (600 MHz, Chloroform-*d*)

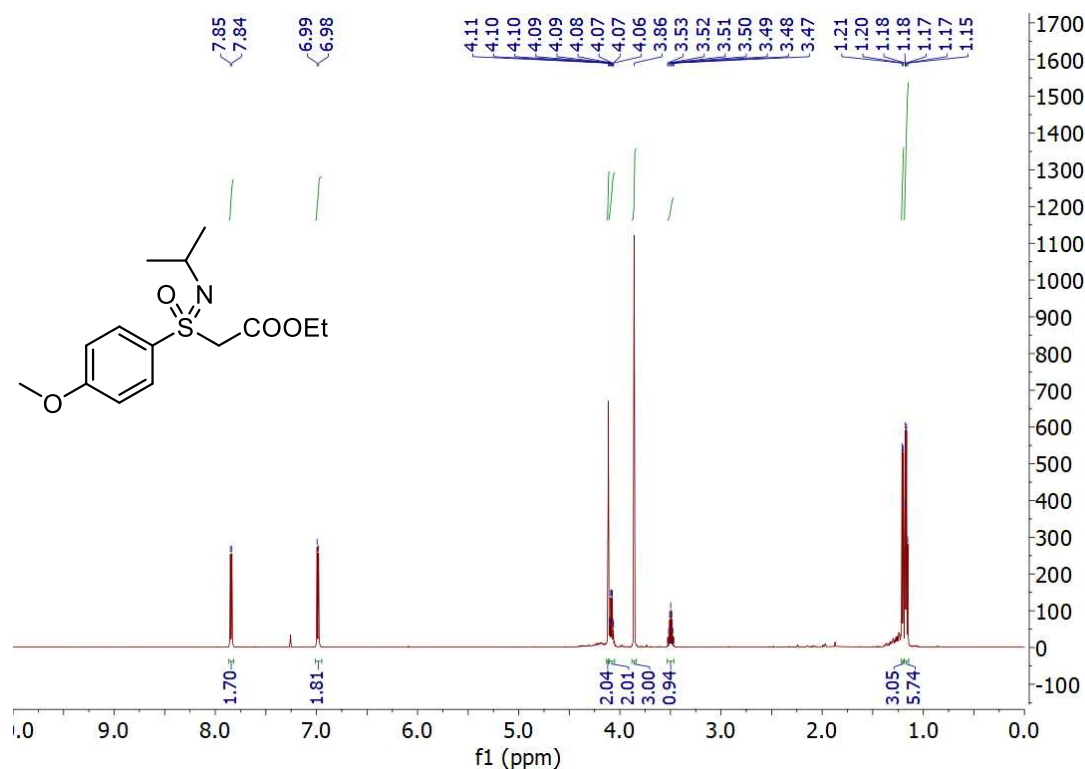

$^{13}\text{C}$  NMR (151 MHz, Chloroform-*d*)

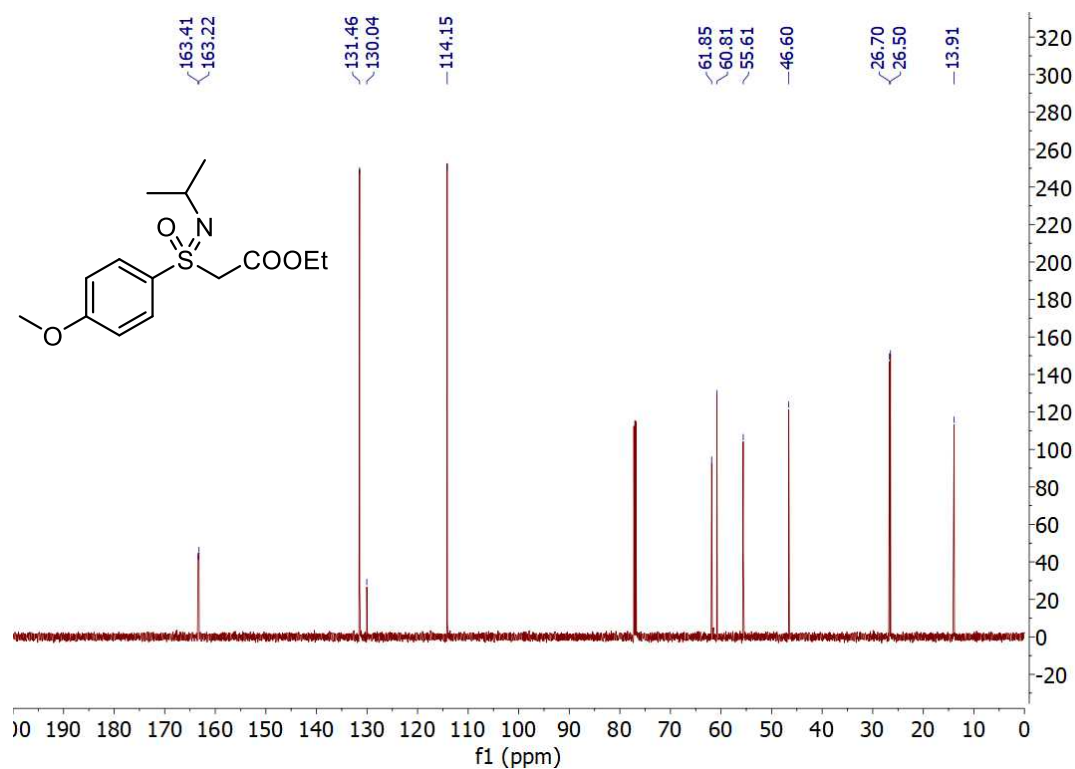

ethyl 2-(*N*-isopropyl-4-(trifluoromethyl)phenylsulfonimidoyl)acetate (**3b**)

$^1\text{H}$  NMR (600 MHz, Chloroform-*d*)

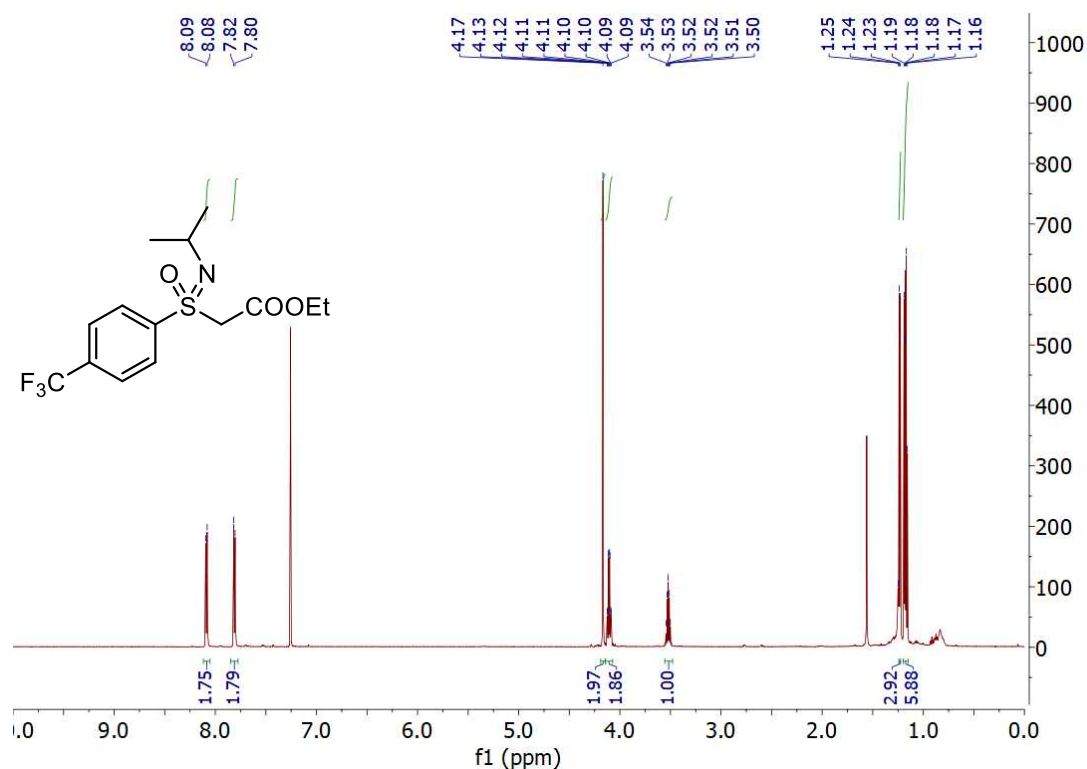

$^{13}\text{C}$  NMR (151 MHz, Chloroform-*d*)

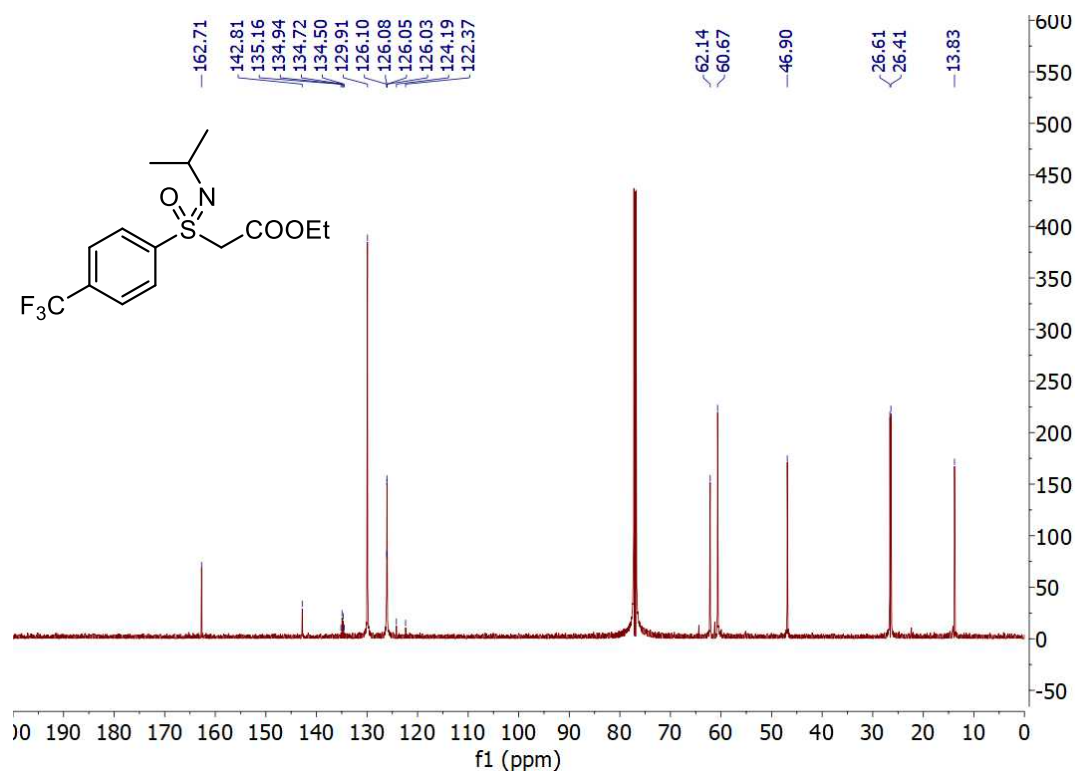



**<sup>19</sup>F NMR** (564 MHz, Chloroform-*d*)

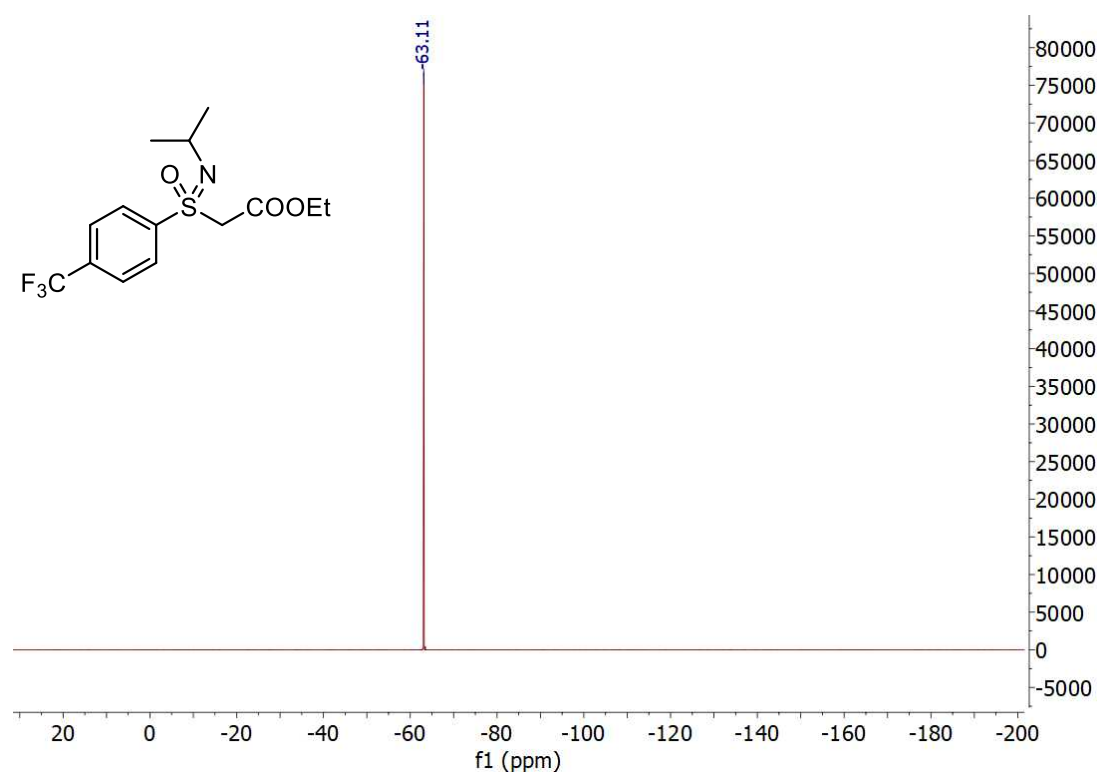



ethyl 2-(4-fluoro-*N*-isopropylphenylsulfonimidoyl)acetate (**3d**)

$^1\text{H}$  NMR (600 MHz, Chloroform-*d*)

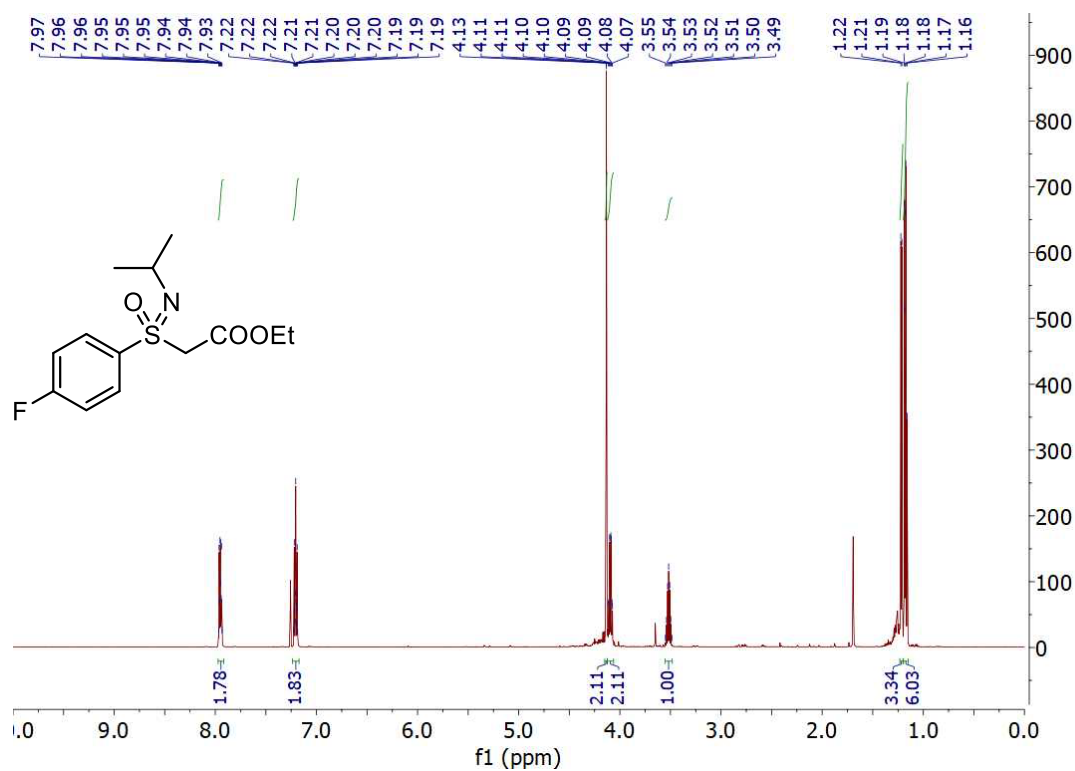

$^{13}\text{C}$  NMR (151 MHz, Chloroform-*d*)

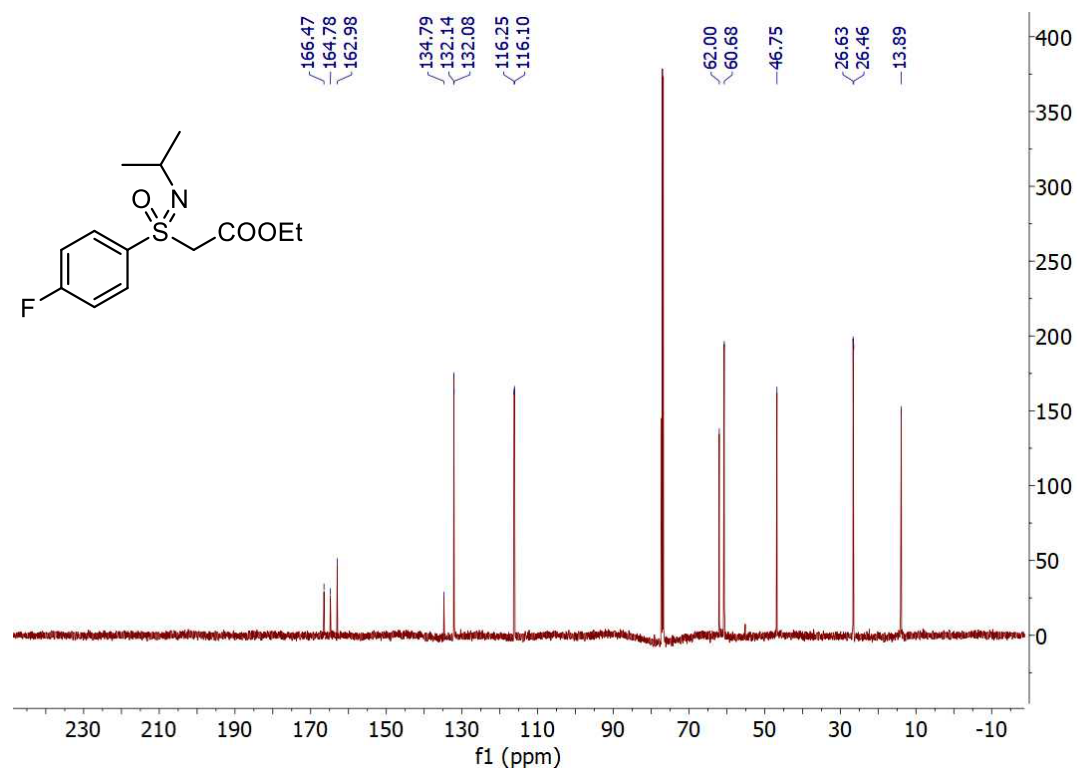

**<sup>19</sup>F NMR** (564 MHz, Chloroform-*d*)

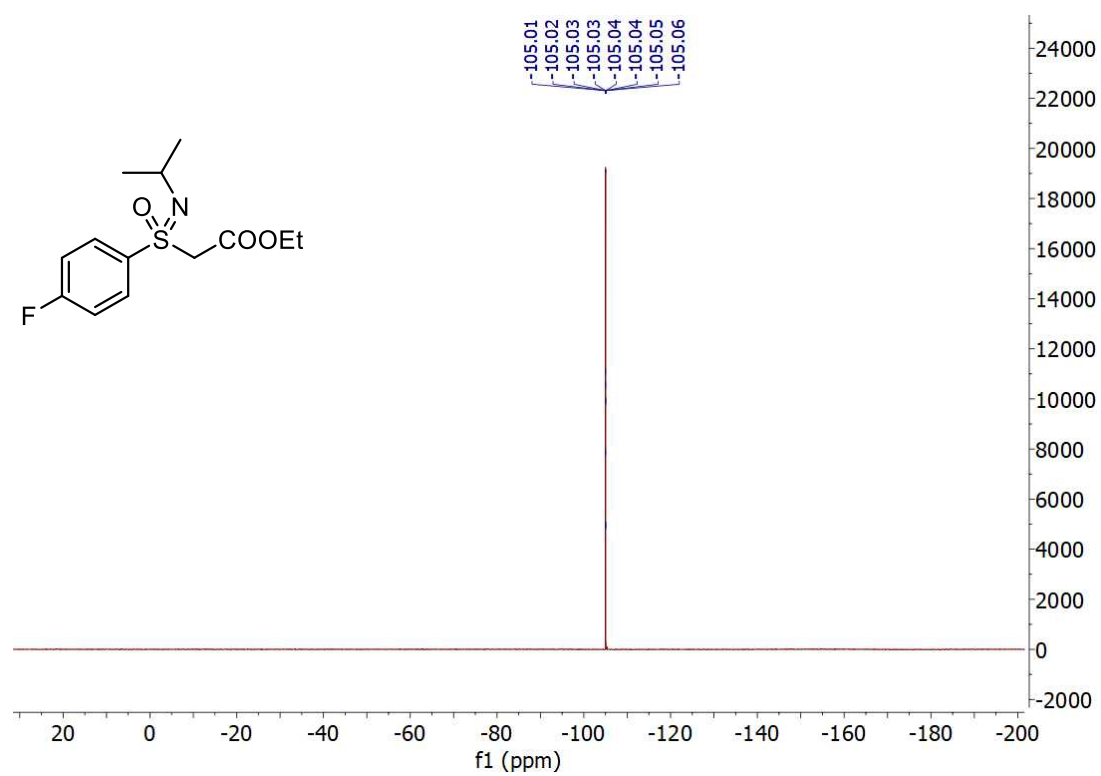

ethyl 2-(4-chloro-*N*-isopropylphenylsulfonimidoyl)acetate (**3e**)

$^1\text{H}$  NMR (600 MHz, Chloroform-*d*)

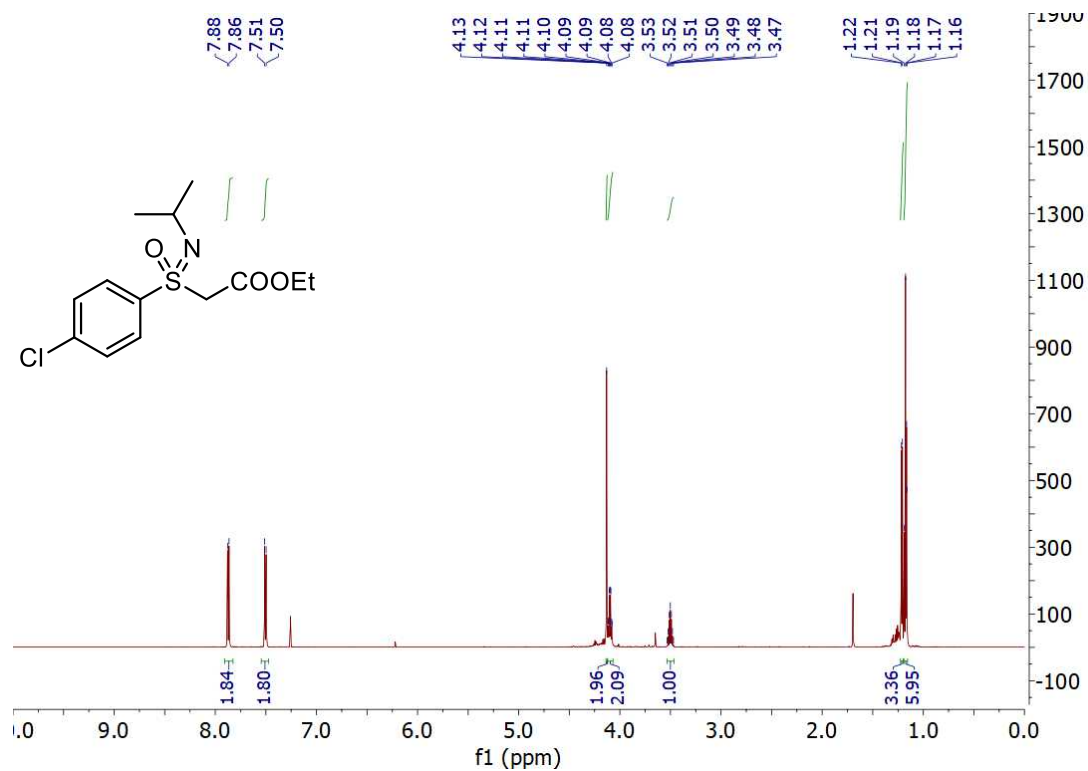

$^{13}\text{C}$  NMR (151 MHz, Chloroform-*d*)

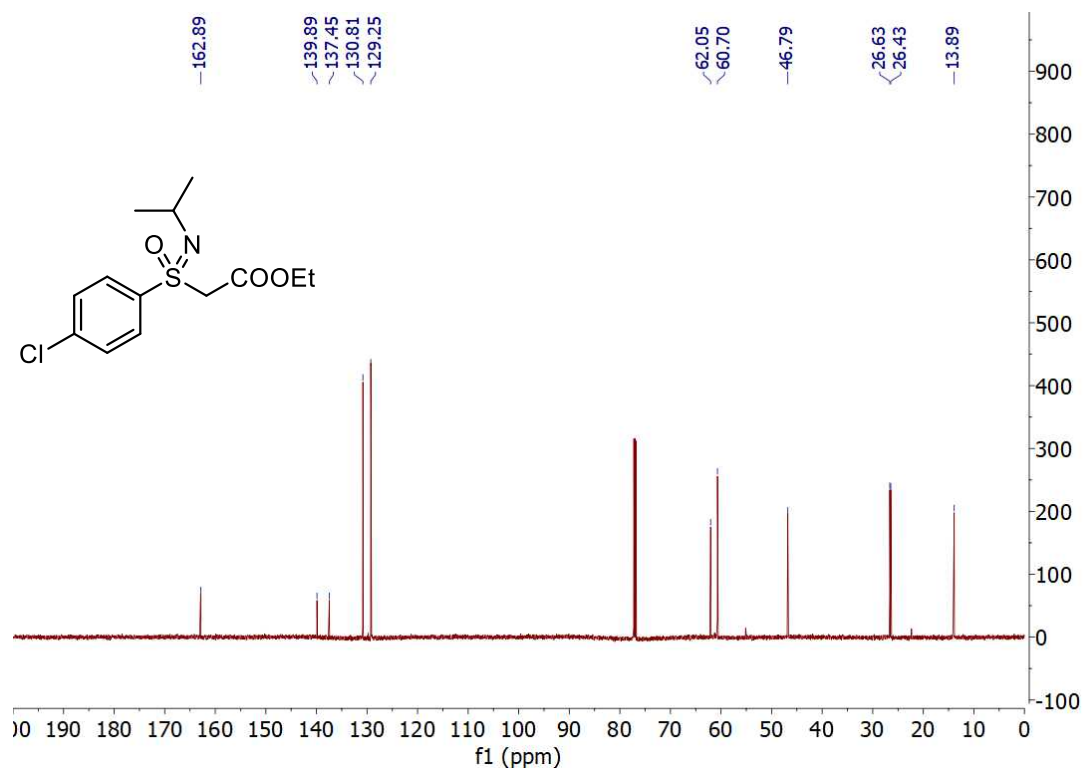

ethyl 2-(4-bromo-*N*-isopropylphenylsulfonimidoyl)acetate (3f)

$^1\text{H}$  NMR (600 MHz, Chloroform-*d*)

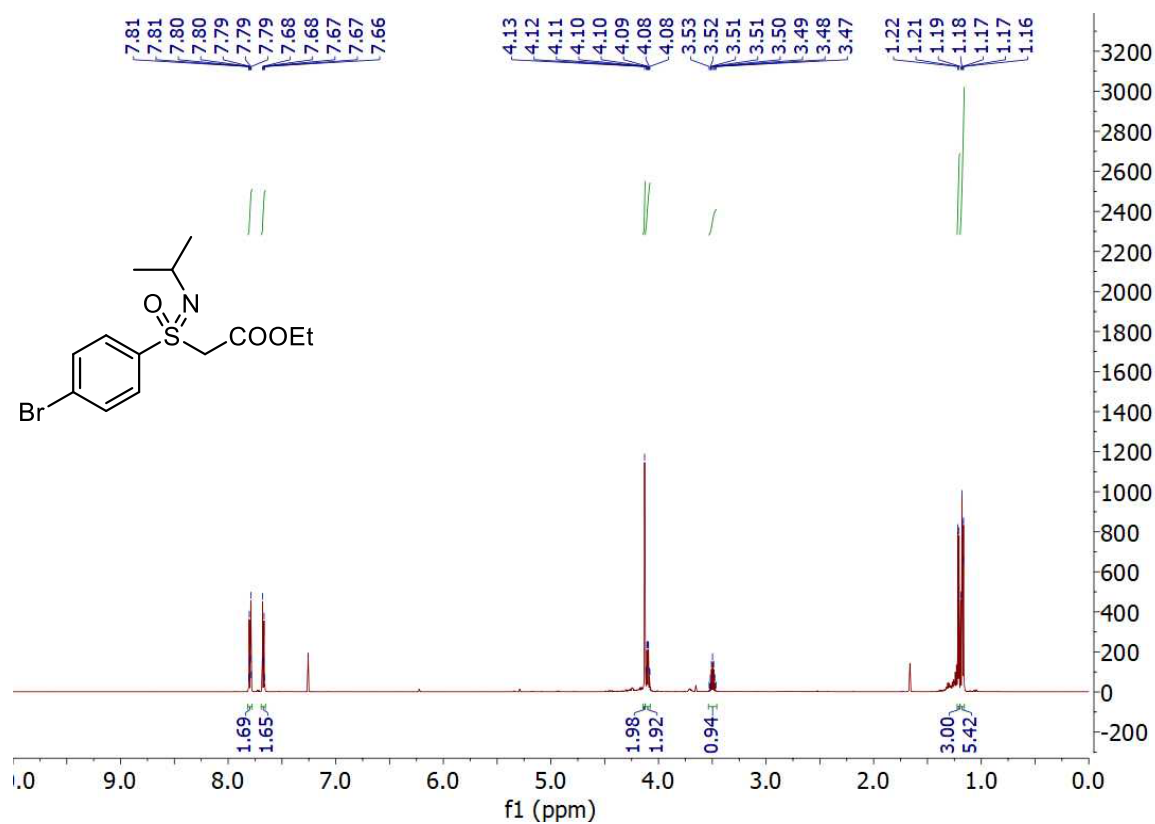

$^{13}\text{C}$  NMR (151 MHz, Chloroform-*d*)

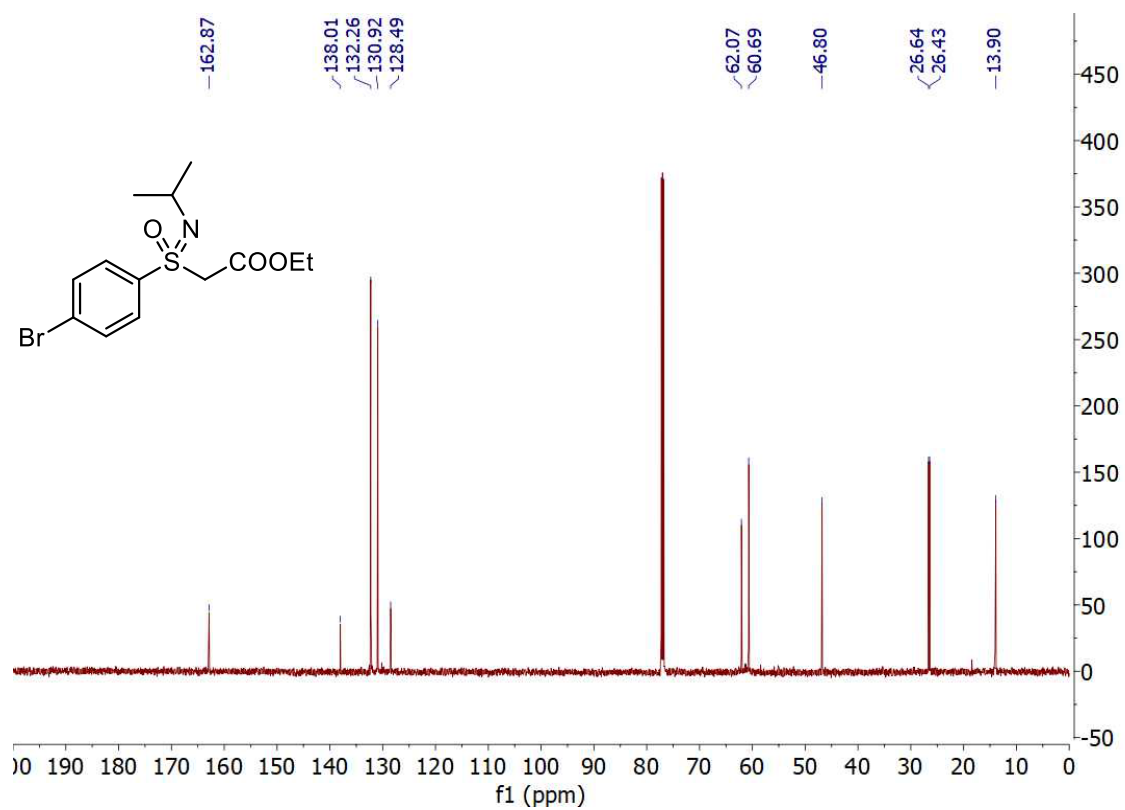

ethyl 2-(*N*-isopropyl-3-methylphenylsulfonimidoyl)acetate (**3g**)

$^1\text{H}$  NMR (600 MHz, Chloroform-*d*)

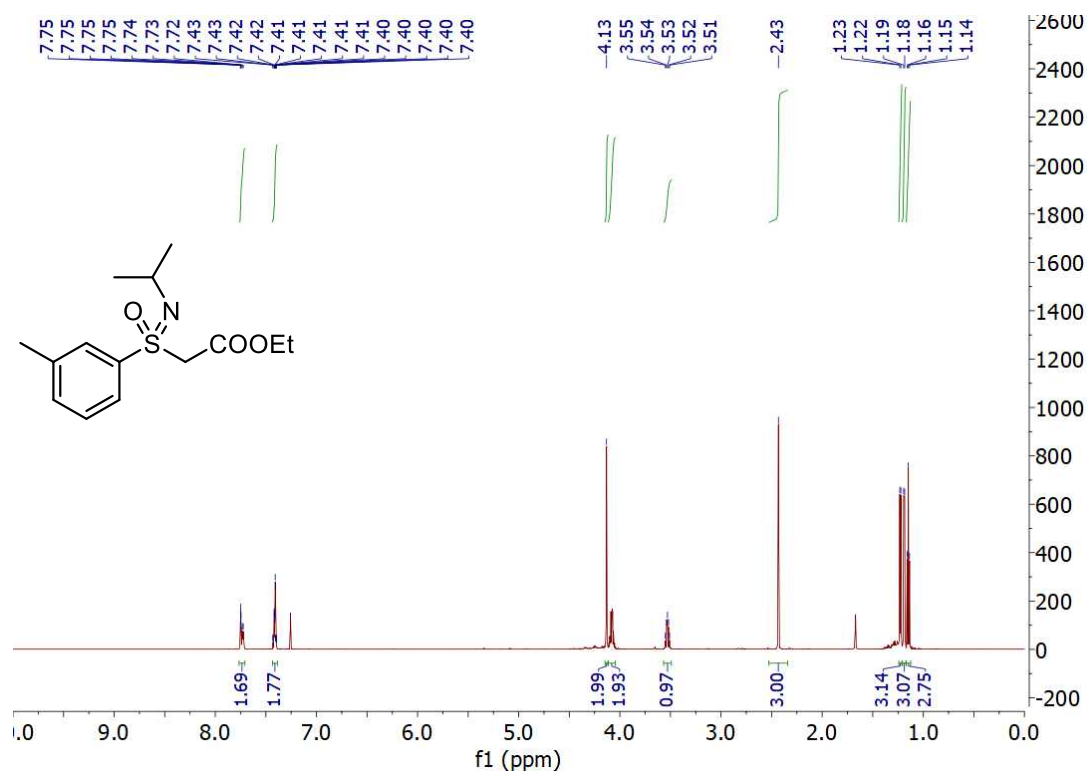

$^{13}\text{C}$  NMR (151 MHz, Chloroform-*d*)

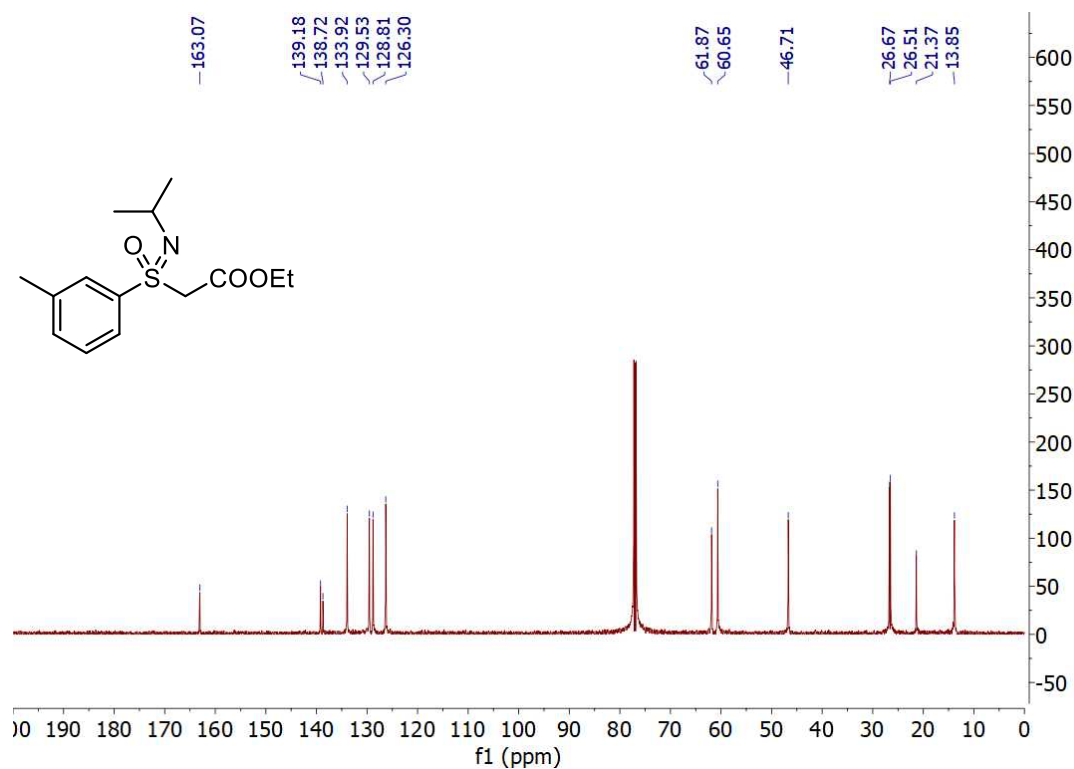

ethyl 2-(*N*-isopropyl-3-methoxyphenylsulfonimidoyl)acetate (3h)

$^1\text{H}$  NMR (600 MHz, Chloroform-*d*)

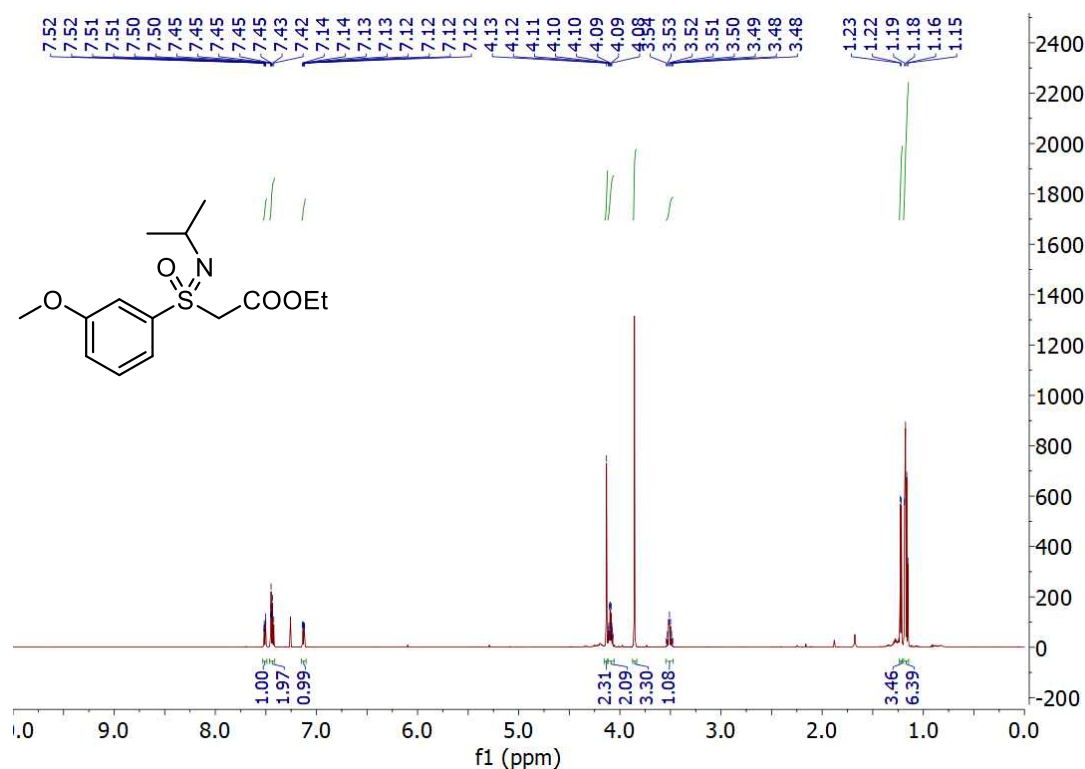

$^{13}\text{C}$  NMR (151 MHz, Chloroform-*d*)

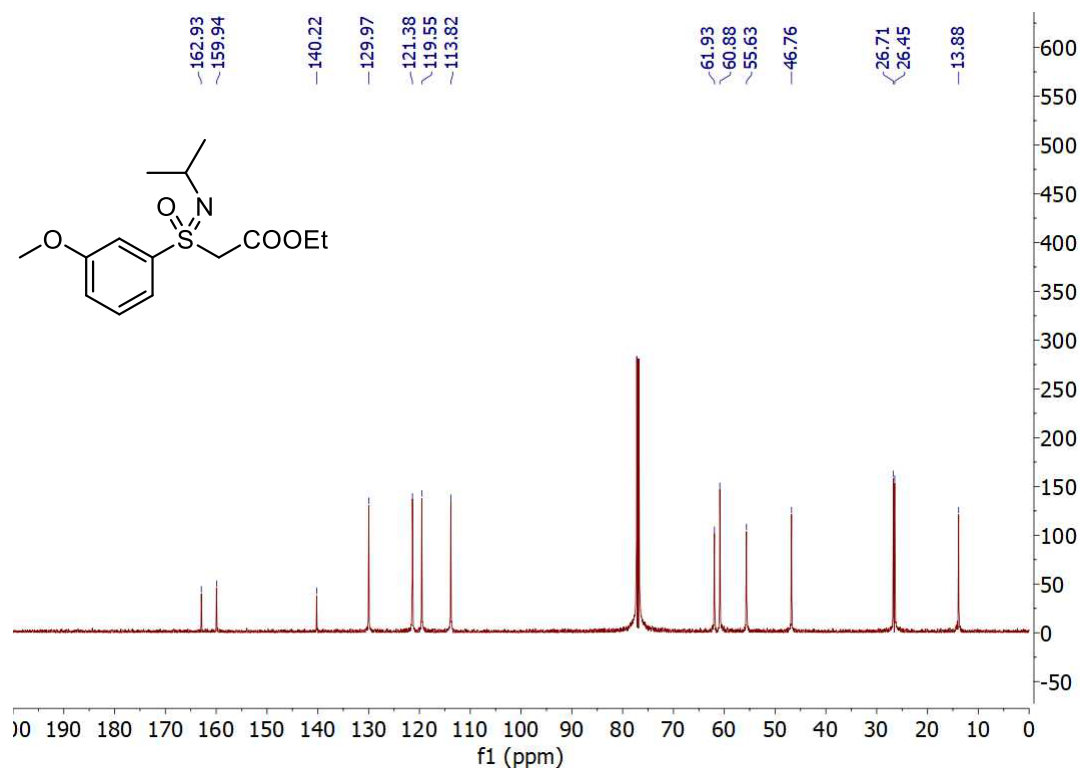



ethyl 2-(3-fluoro-*N*-isopropylphenylsulfonimidoyl)acetate (3i)

$^1\text{H}$  NMR (600 MHz, Chloroform-*d*)

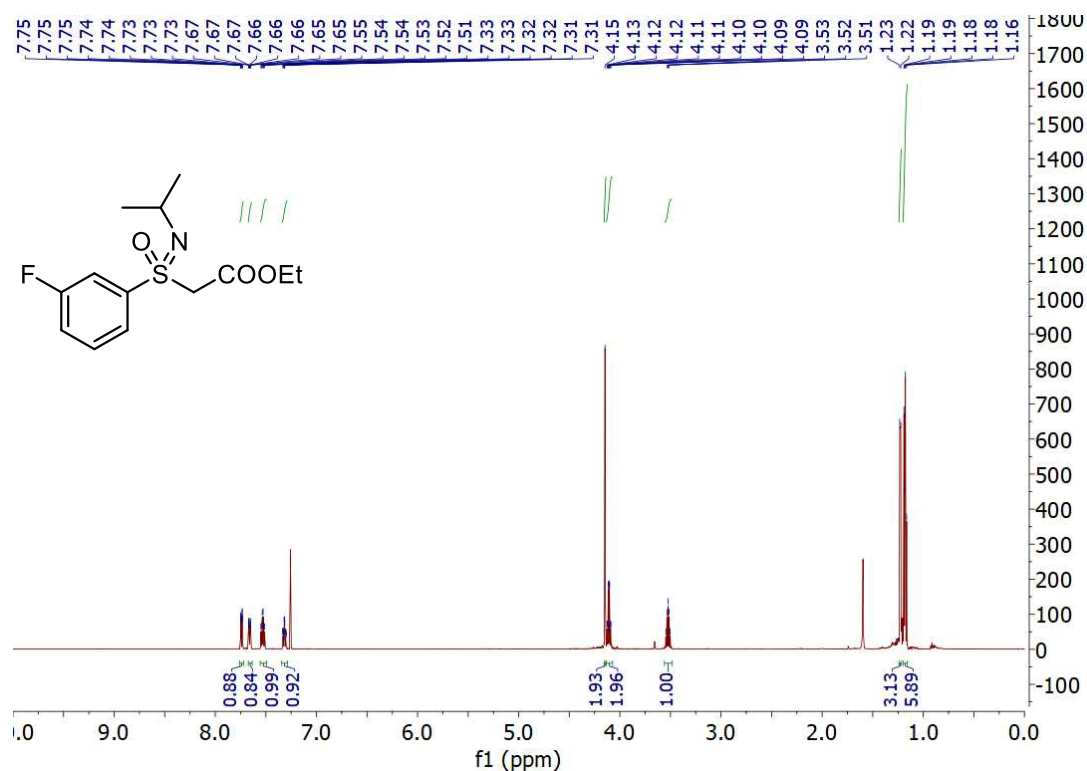

$^{13}\text{C}$  NMR (151 MHz, Chloroform-*d*)

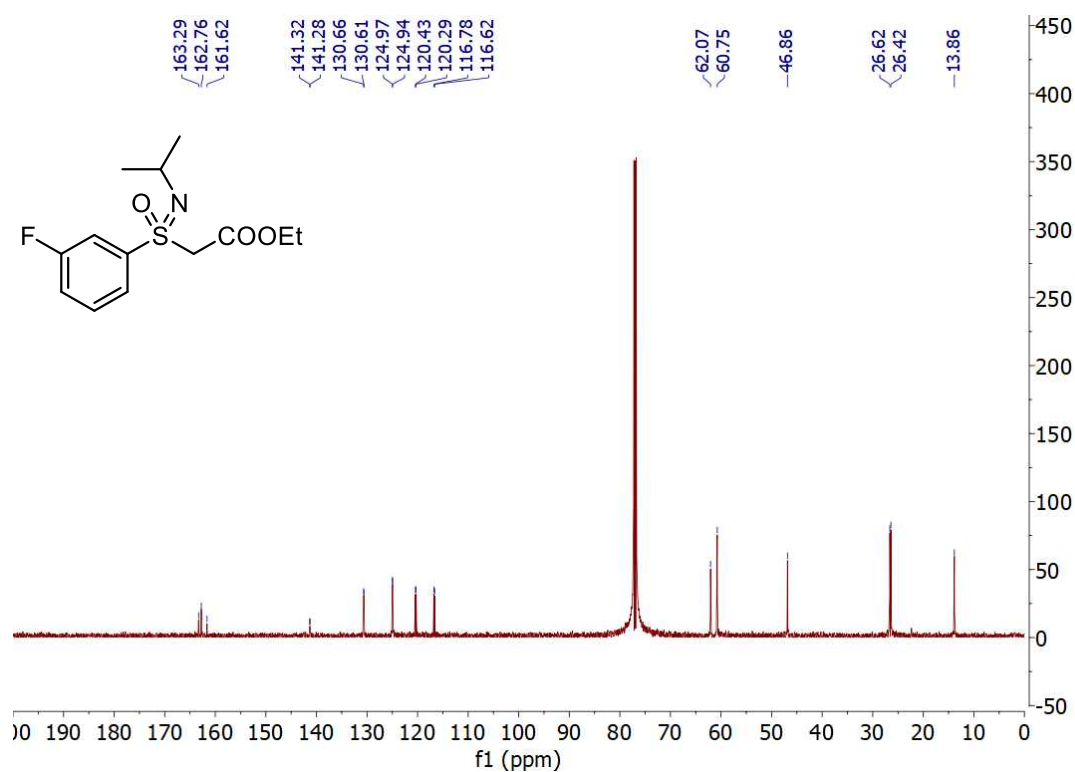

**$^{19}\text{F}$  NMR** (564 MHz, Chloroform-*d*)

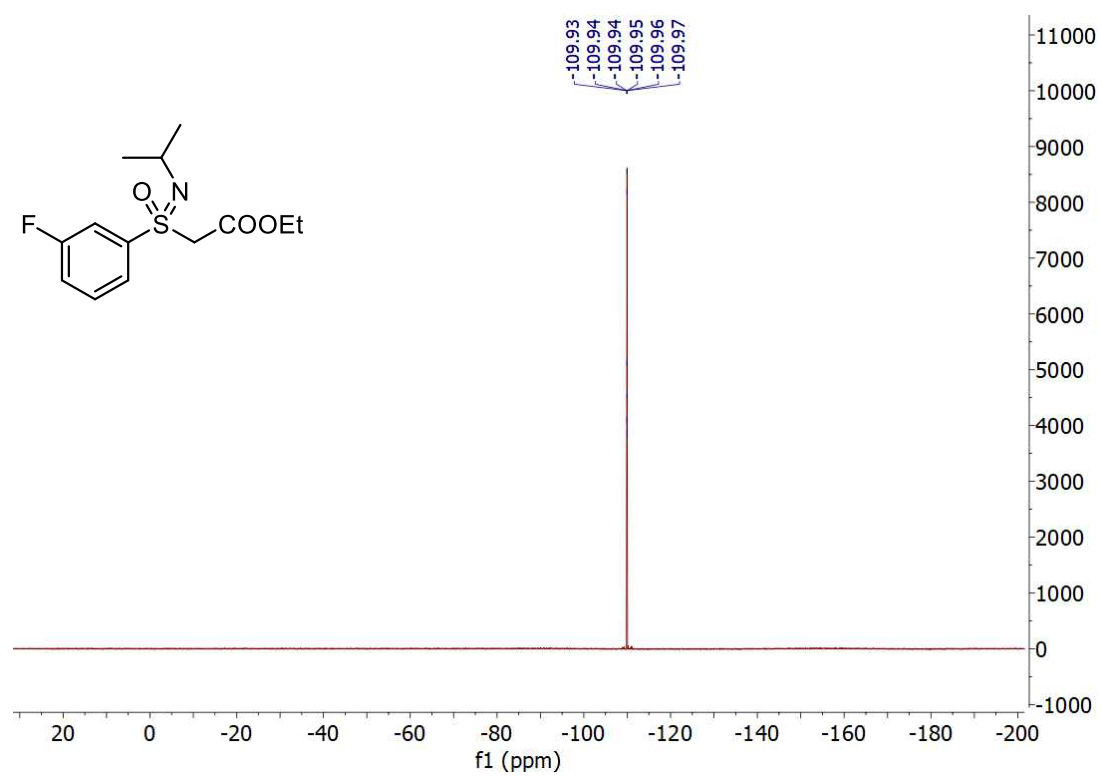

ethyl 2-(3-chloro-*N*-isopropylphenylsulfonimidoyl)acetate (3j)

$^1\text{H}$  NMR (600 MHz, Chloroform-*d*)

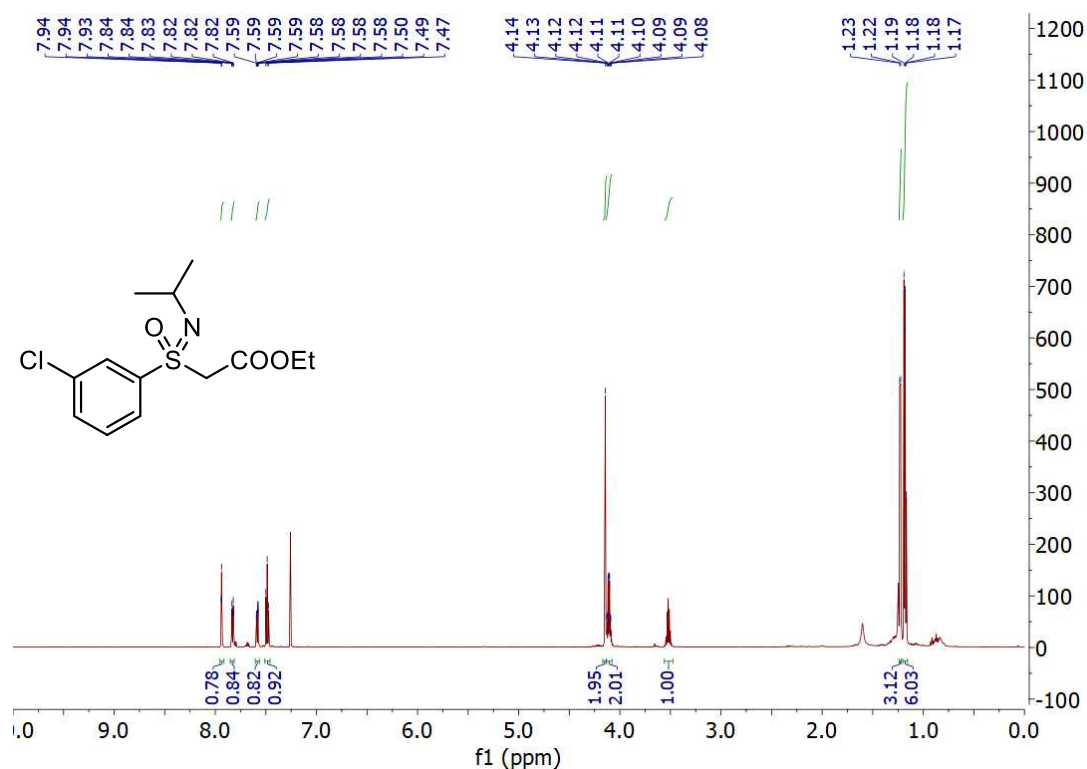

$^{13}\text{C}$  NMR (151 MHz, Chloroform-*d*)

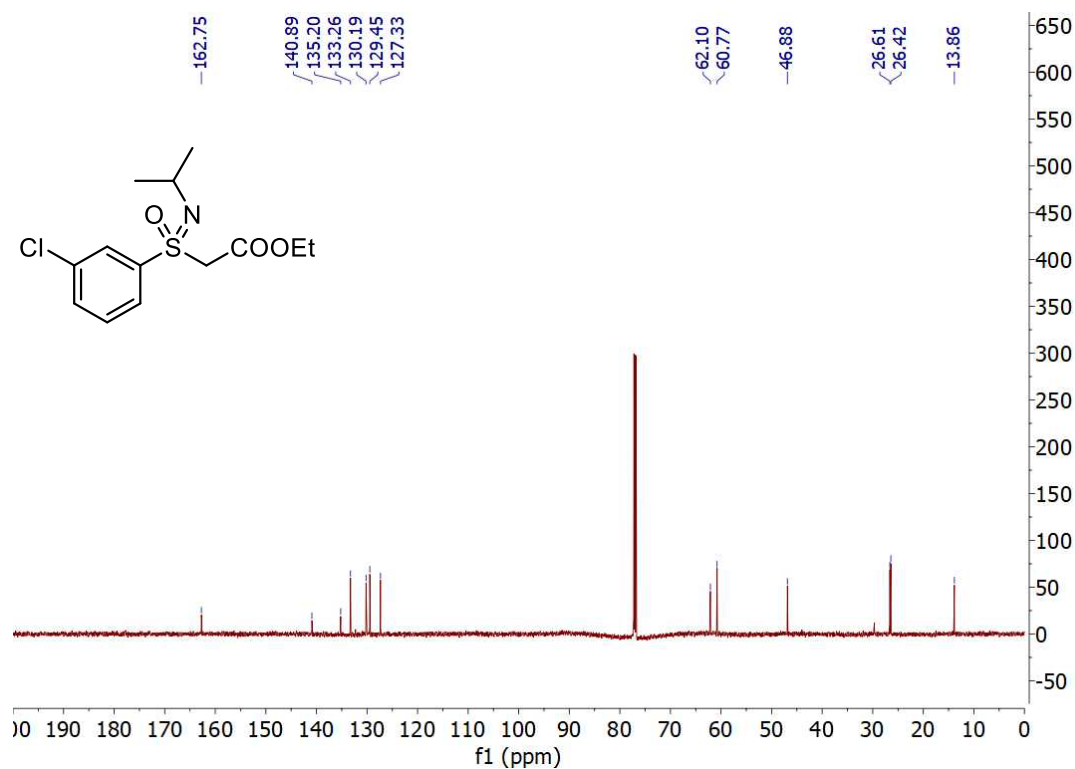

ethyl (*E*)-2-(*N*-isopropyl-2-phenylvinylsulfonimidoyl)acetate (3k)

$^1\text{H}$  NMR (600 MHz, Chloroform-*d*)

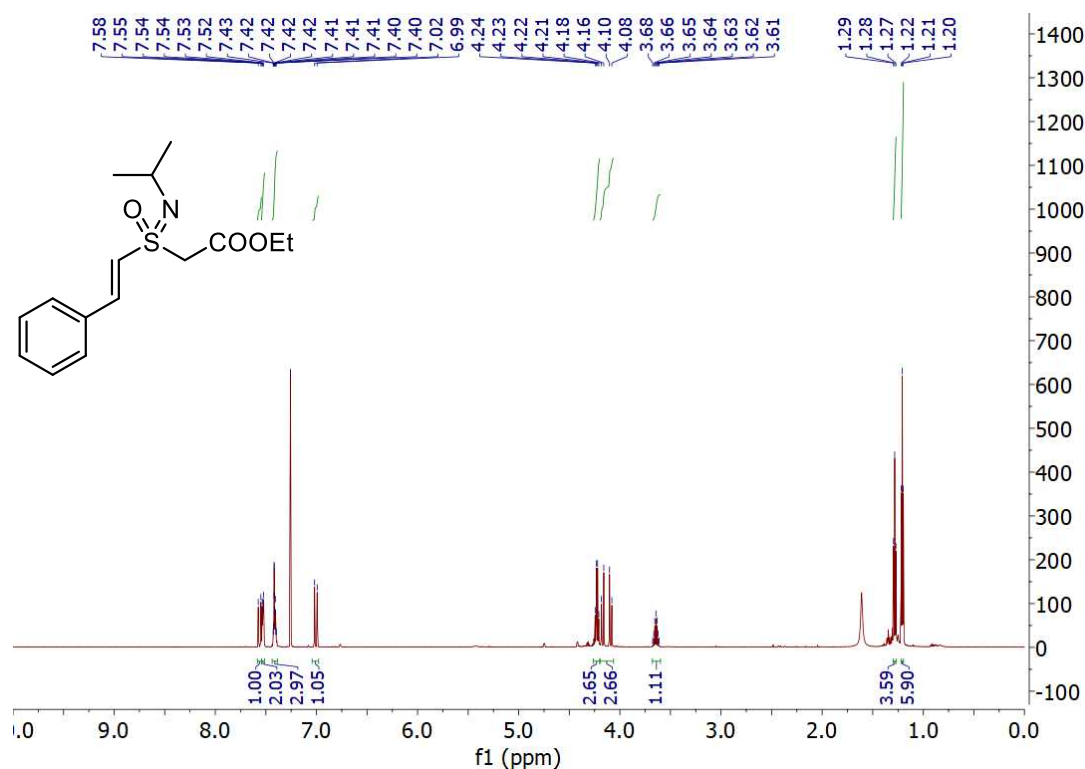

$^{13}\text{C}$  NMR (151 MHz, Chloroform-*d*)

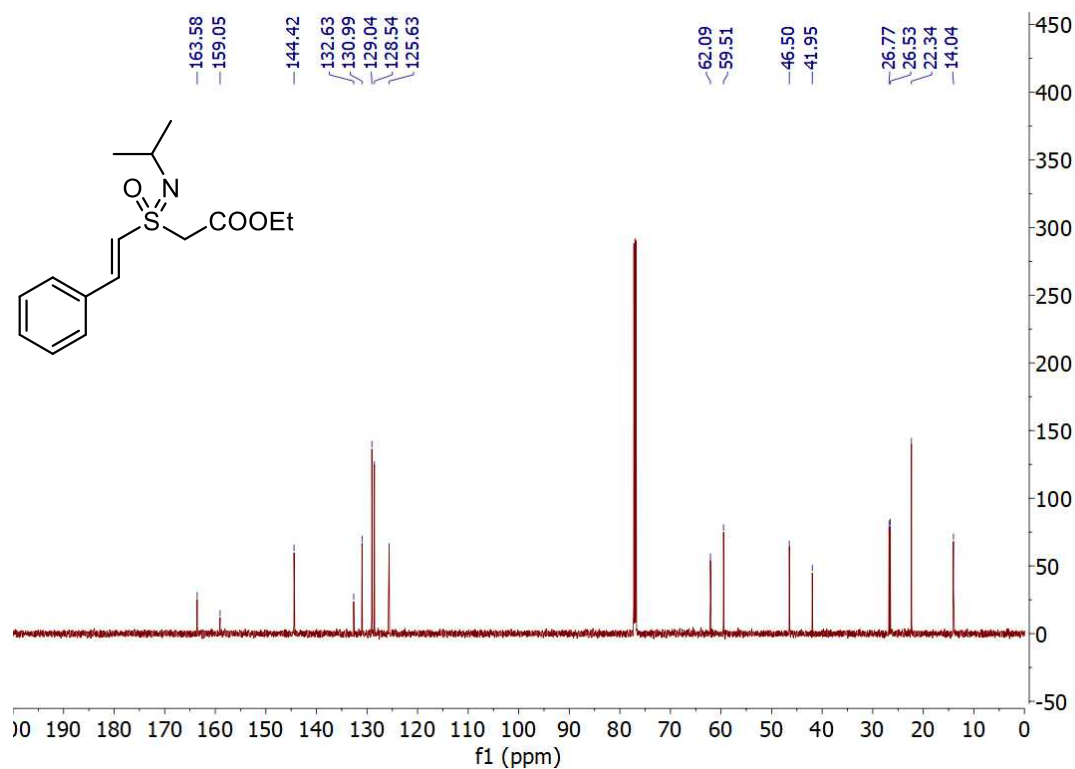

ethyl 2-(*N*-isopropylthiophene-2-sulfonimidoyl)acetate (3l)

$^1\text{H}$  NMR (600 MHz, Chloroform-*d*)

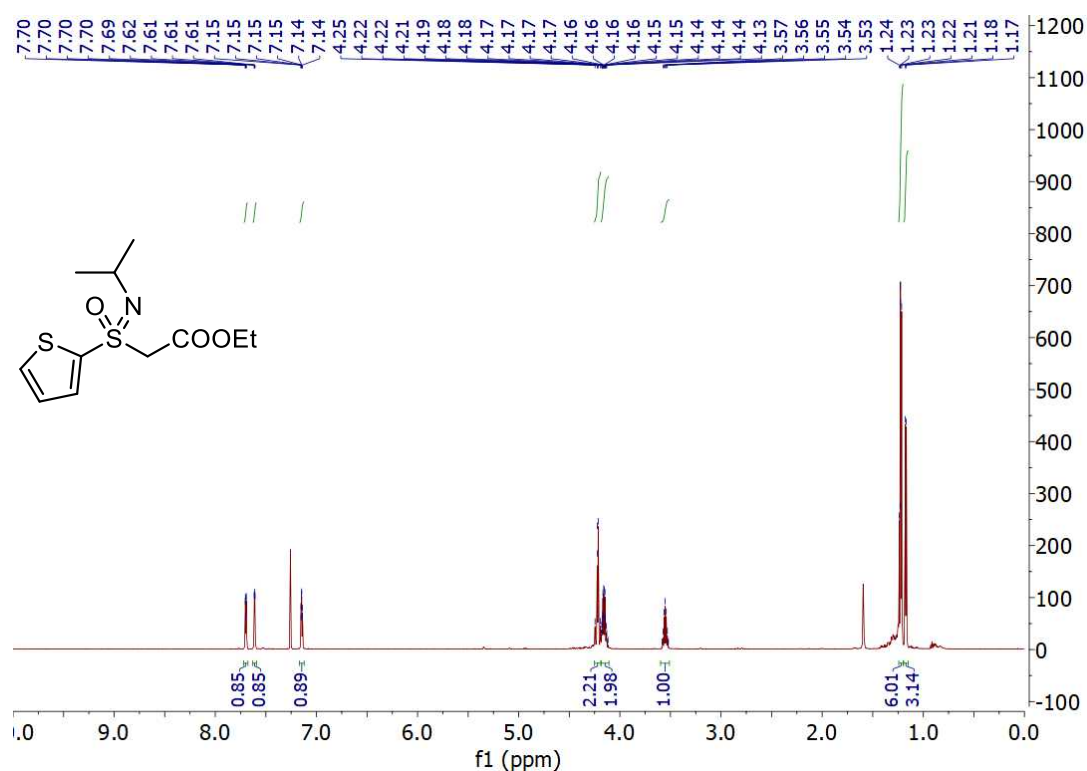

$^{13}\text{C}$  NMR (151 MHz, Chloroform-*d*)

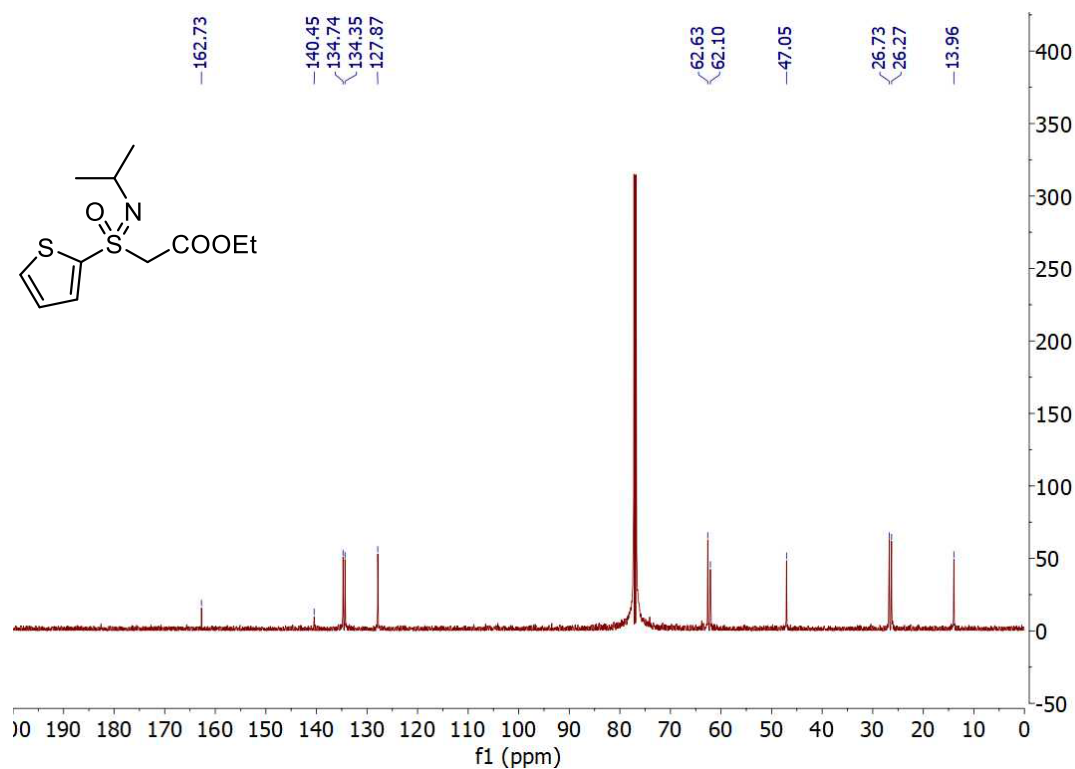

**ethyl 2-(*N*-isopropyl-4-(5-methyl-3-phenylisoxazol-4-yl)phenylsulfonimidoyl)acetate (3m)**

<sup>1</sup>H NMR (600 MHz, Chloroform-*d*)

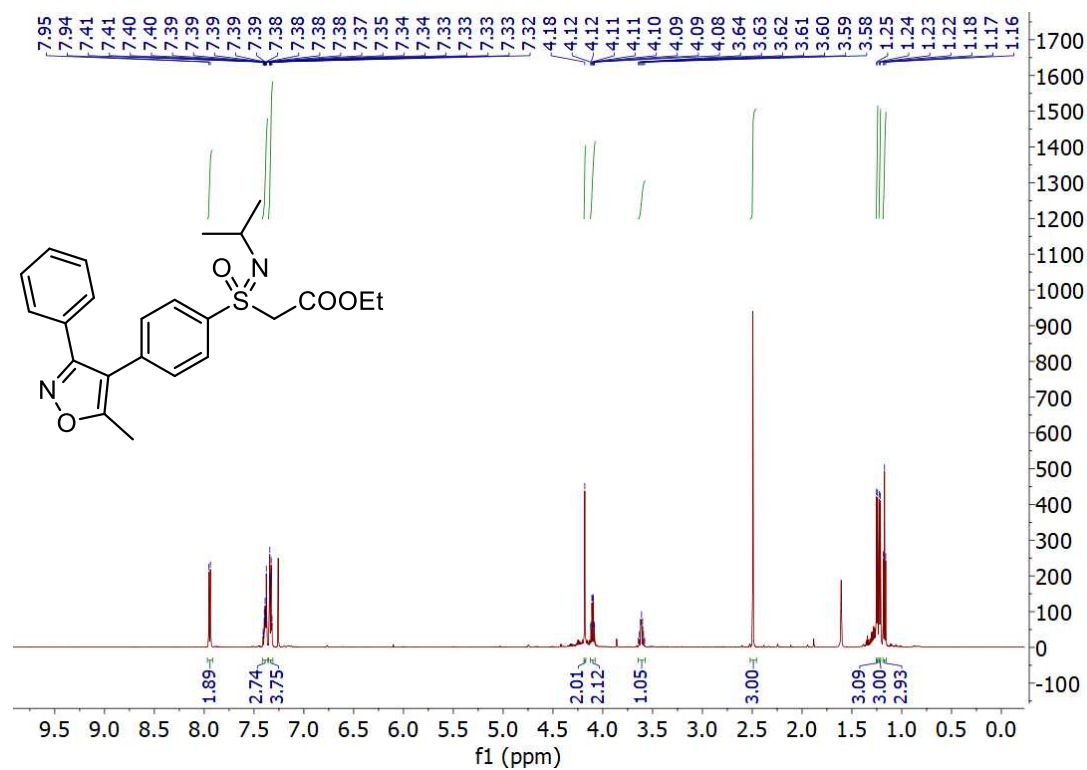

<sup>13</sup>C NMR (151 MHz, Chloroform-*d*)

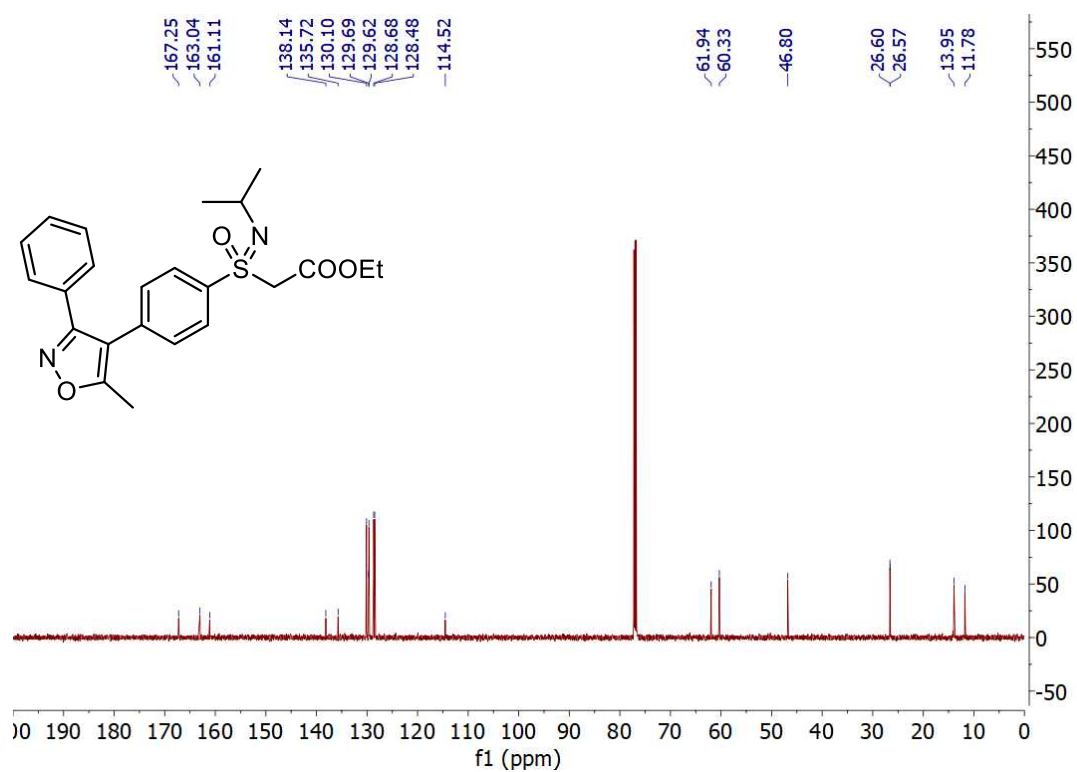

ethyl 2-(*N*-isopropyl-4-methylphenylsulfonimidoyl)acetate (**3n**)

$^1\text{H}$  NMR (600 MHz, Chloroform-*d*):

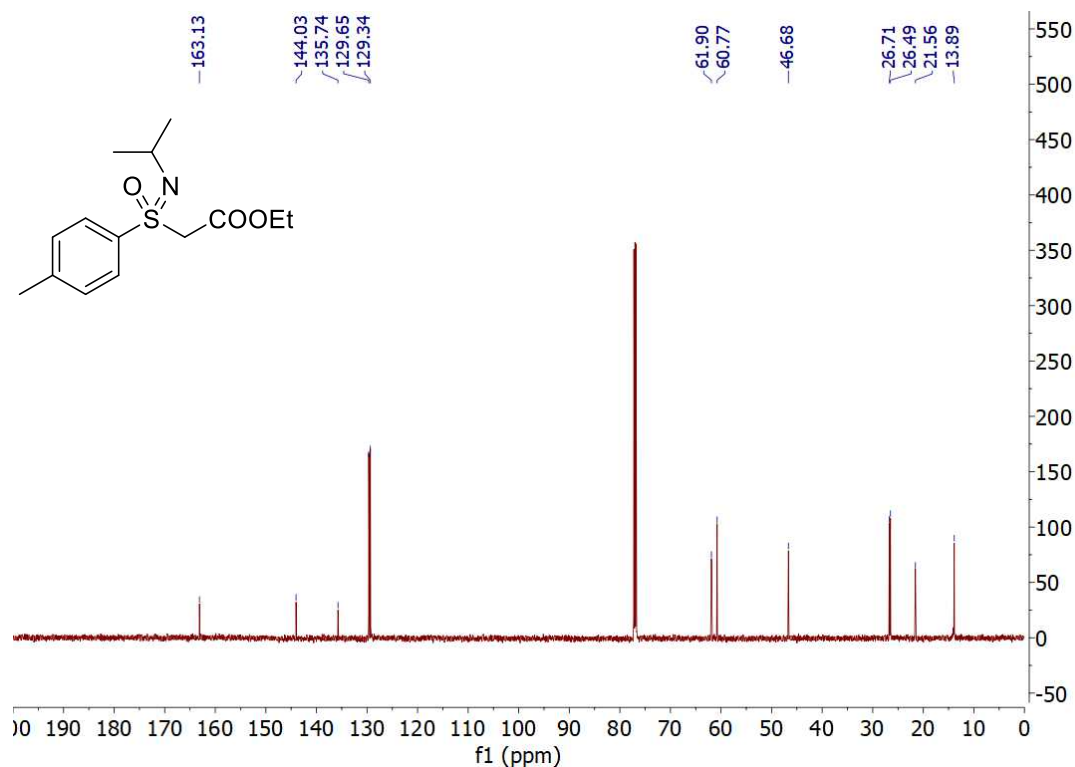

$^{13}\text{C}$  NMR (151 MHz, Chloroform-*d*)

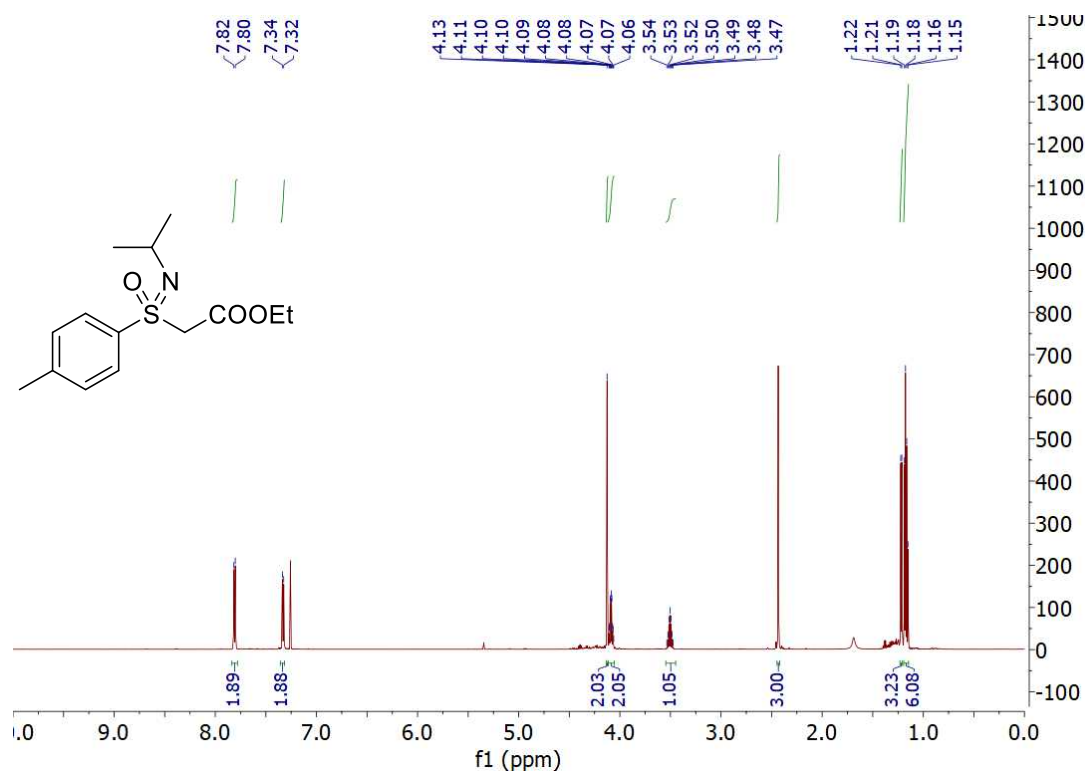

**ethyl 2-(4-methyl-*N*-(2,2,2-trifluoroethyl)phenylsulfonimidoyl)acetate (3o)**

<sup>1</sup>H NMR (600 MHz, Chloroform-*d*)

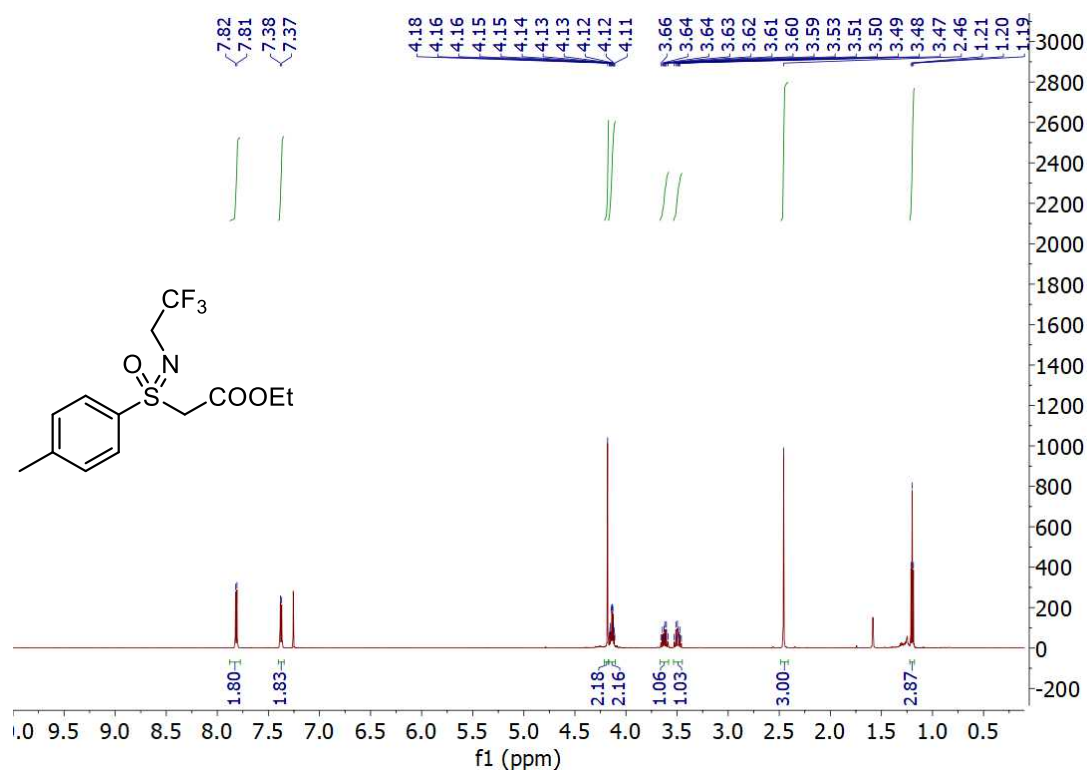

<sup>13</sup>C NMR (151 MHz, Chloroform-*d*)

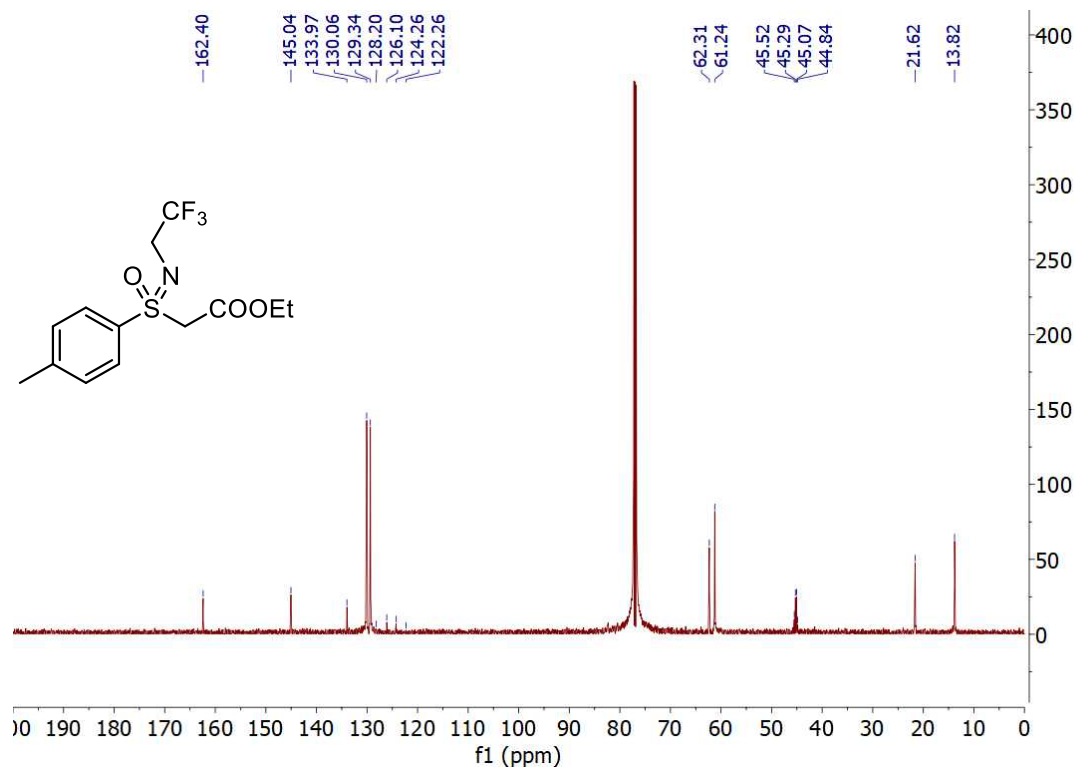



**$^{19}\text{F}$  NMR** (564 MHz, Chloroform-*d*)

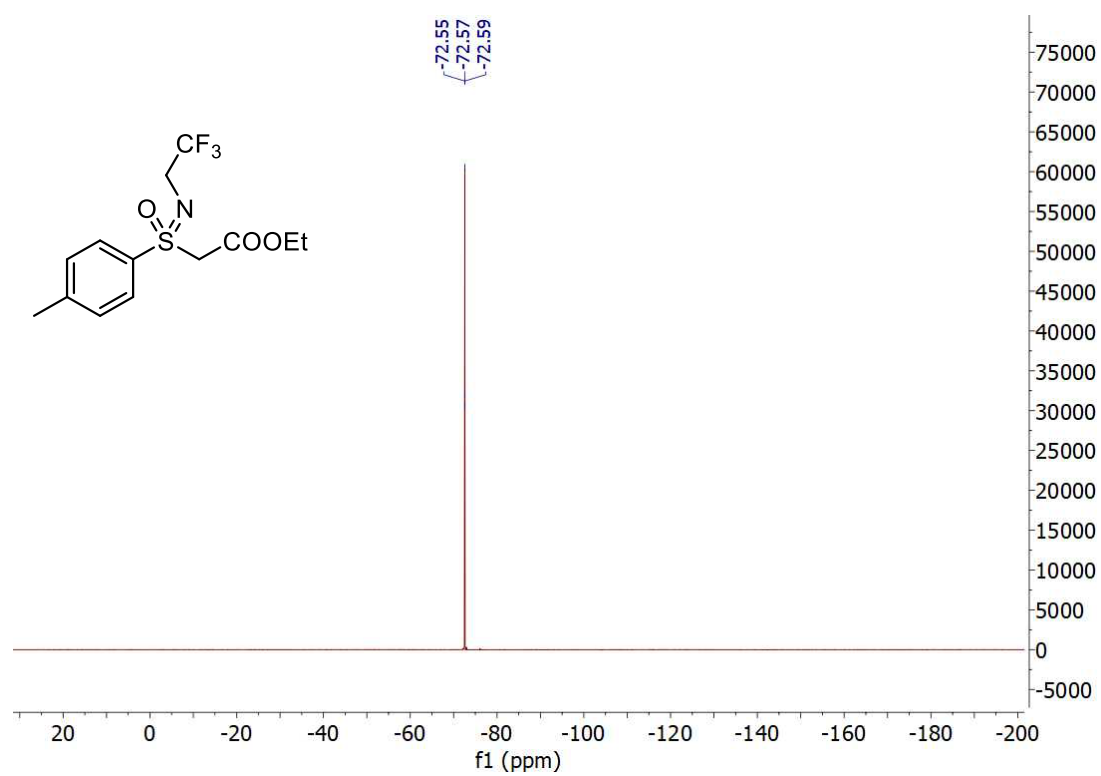

ethyl 2-(*N*-(cyclopropylmethyl)-4-methylphenylsulfonimidoyl)acetate (**3p**)

$^1\text{H}$  NMR (600 MHz, Chloroform-*d*)

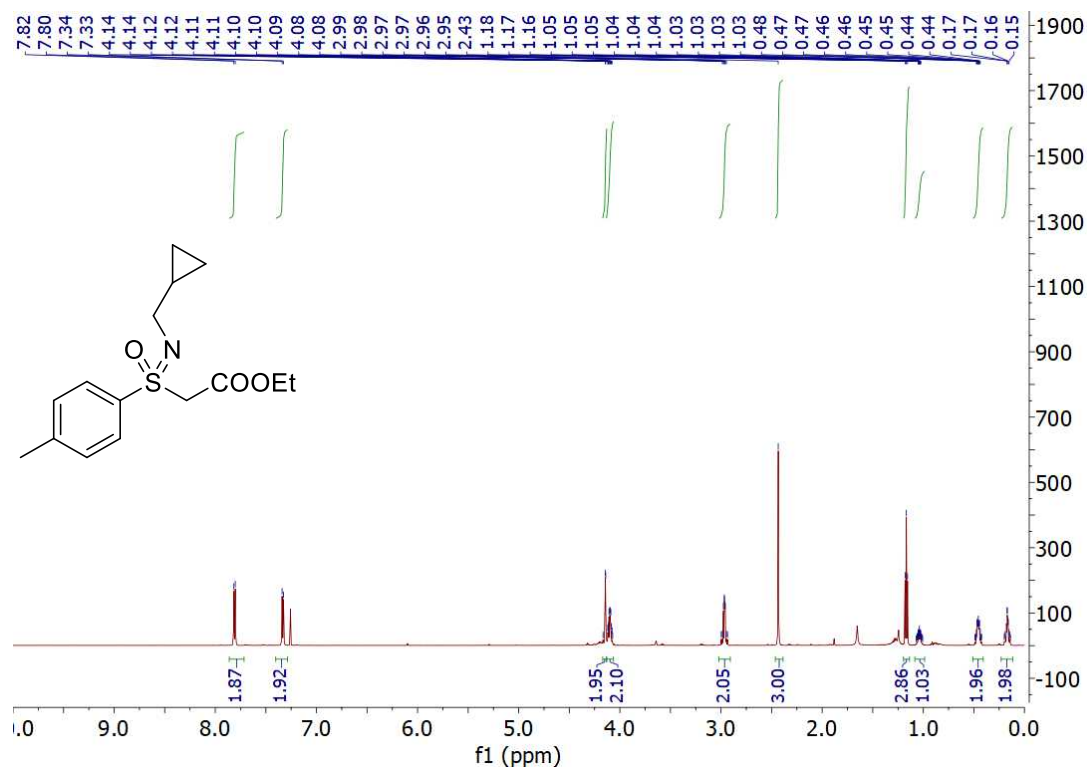

$^{13}\text{C}$  NMR (151 MHz, Chloroform-*d*)

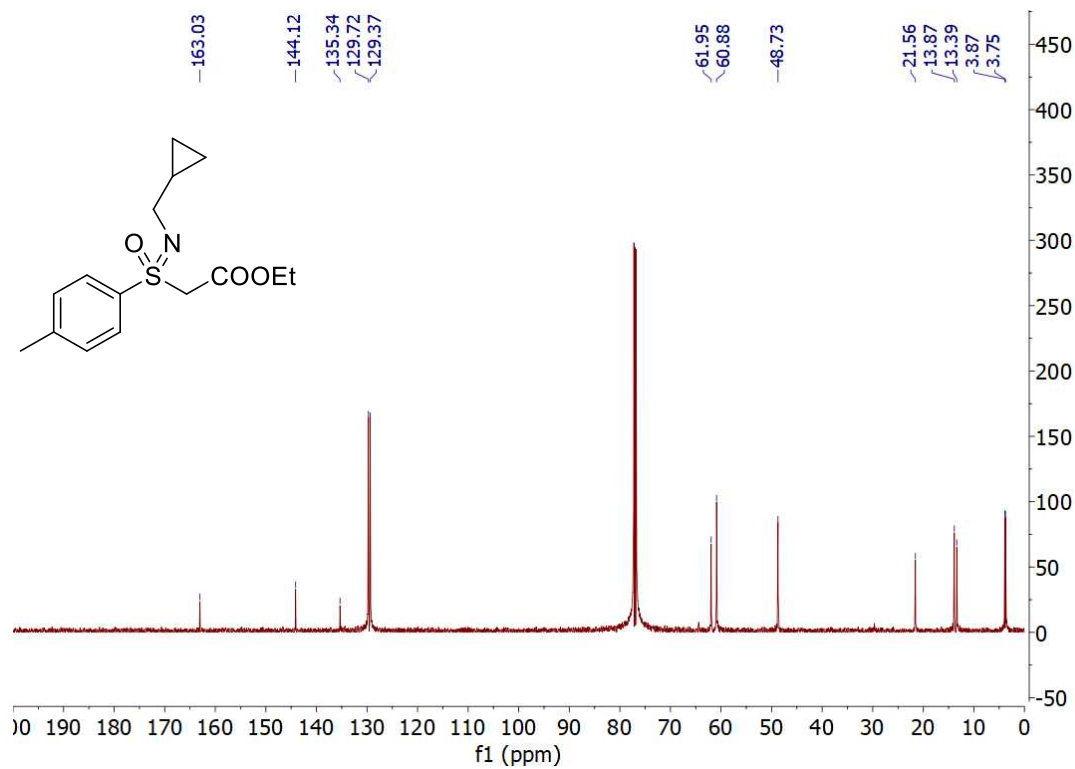

**ethyl 2-(*N*-cyclohexyl-4-methylphenylsulfonimidoyl)acetate (3q)**

<sup>1</sup>H NMR (600 MHz, Chloroform-*d*)

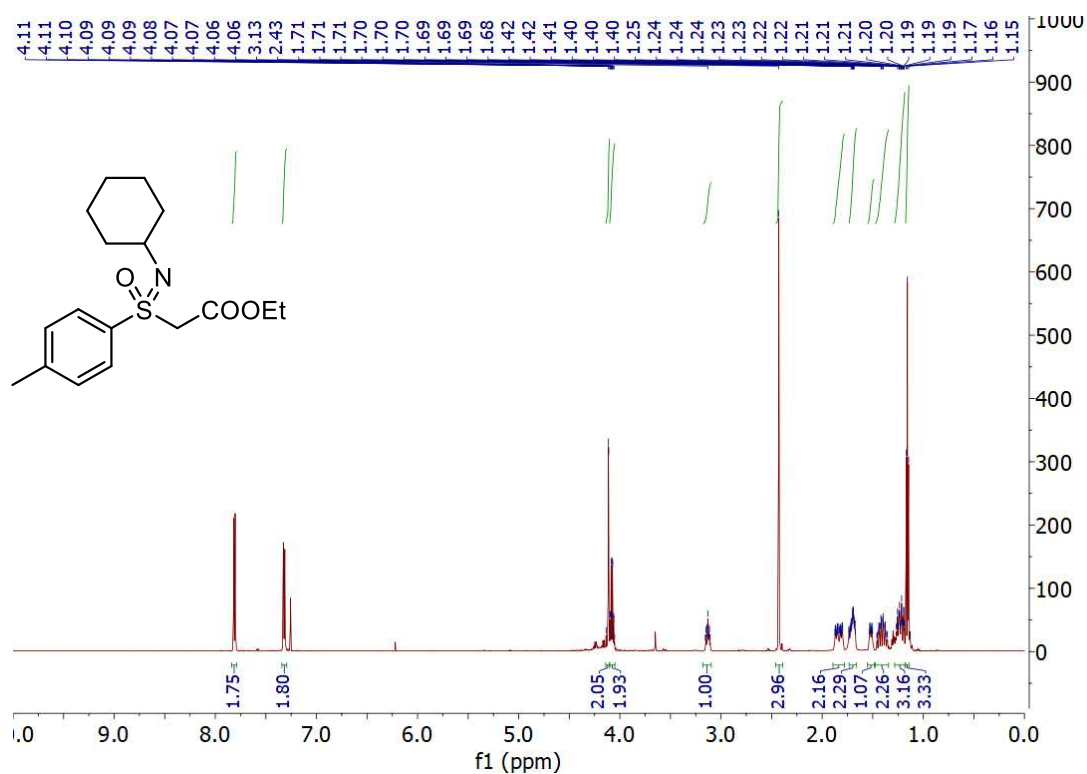

<sup>13</sup>C NMR (151 MHz, Chloroform-*d*)

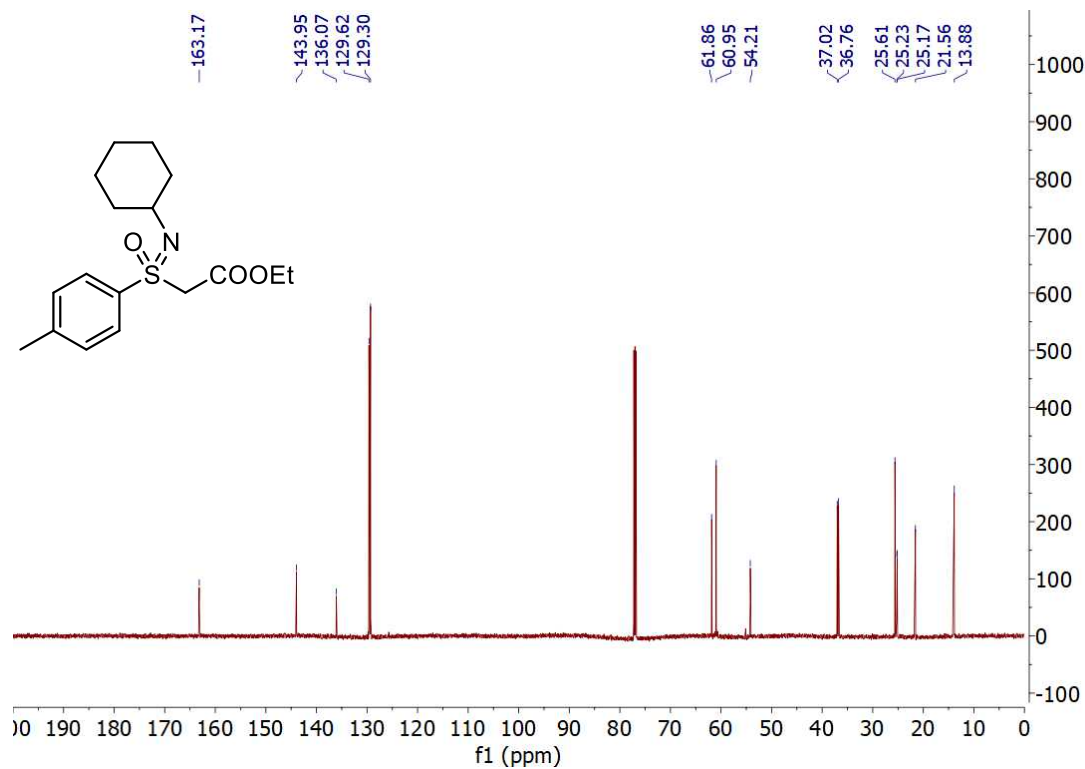

ethyl 2-(*N*-benzyl-4-methylphenylsulfonimidoyl)acetate (**3r**)

$^1\text{H}$  NMR (600 MHz, Chloroform-*d*)

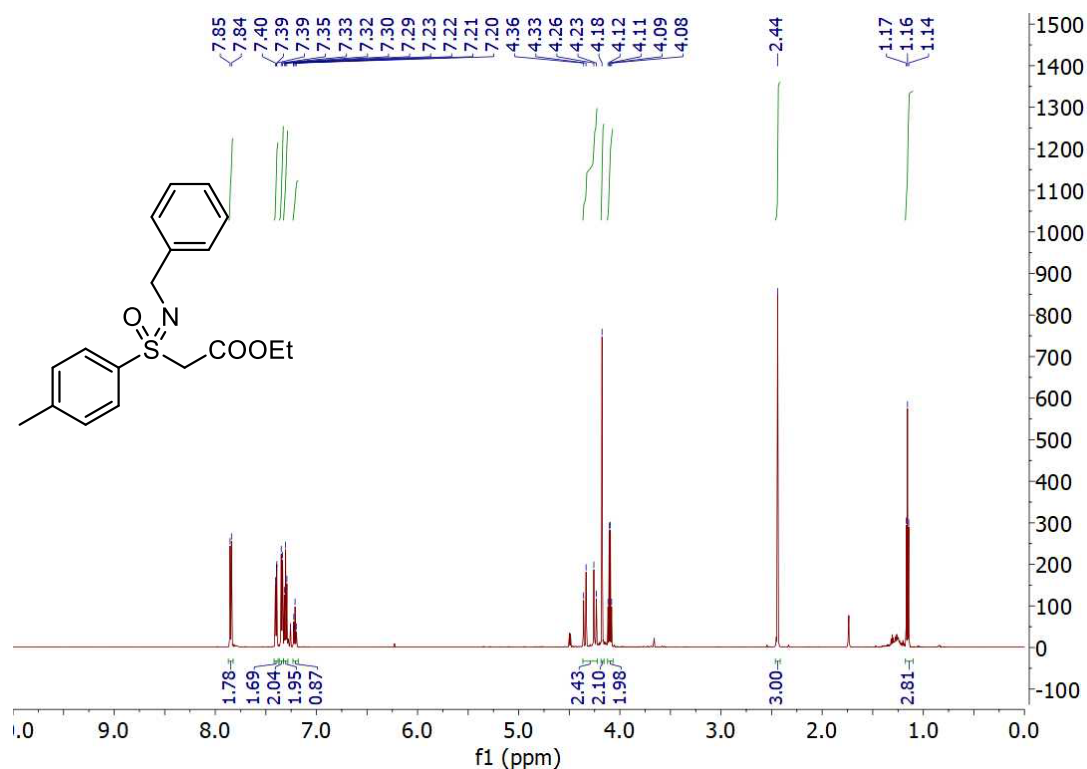

$^{13}\text{C}$  NMR (151 MHz, Chloroform-*d*)

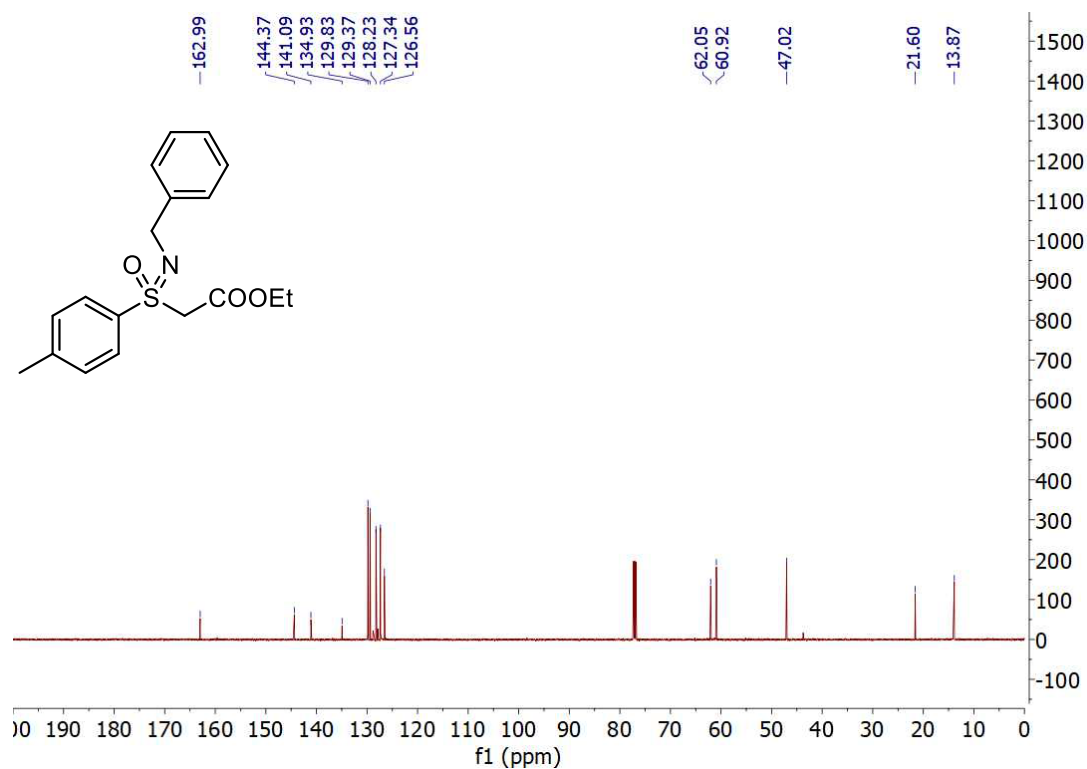

ethyl 2-(4-methyl-*N*-phenethylphenylsulfonimido)acetate (**3s**)

$^1\text{H}$  NMR (600 MHz, Chloroform-*d*)

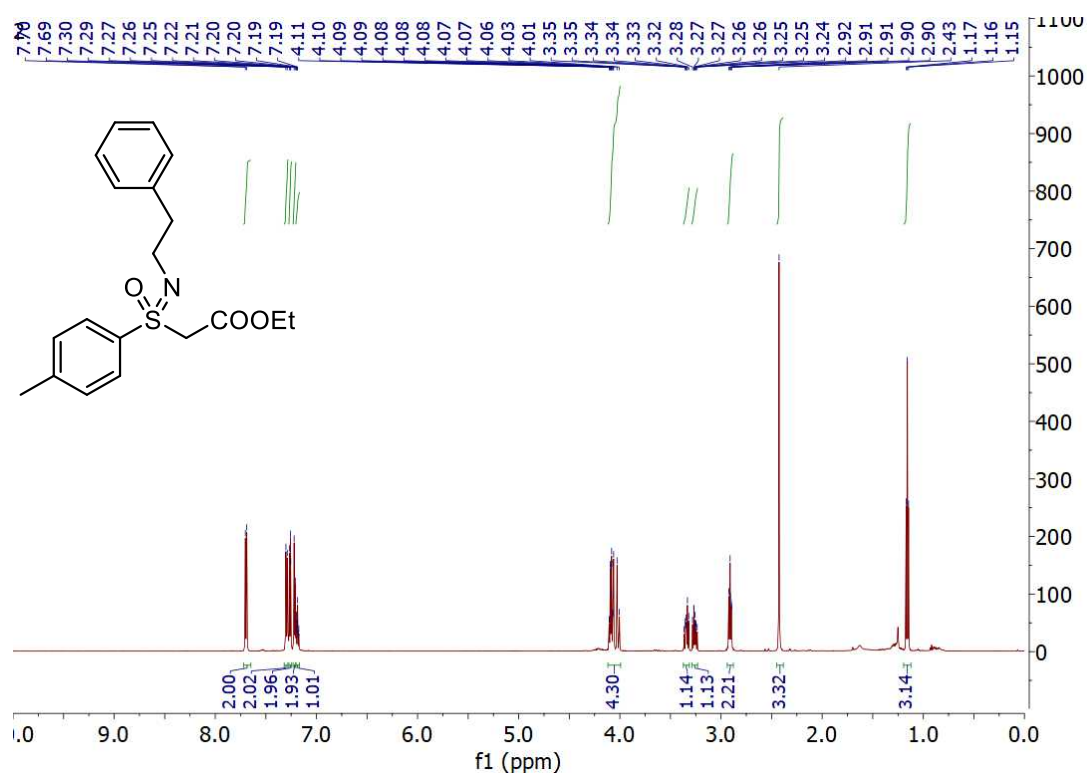

$^{13}\text{C}$  NMR (151 MHz, Chloroform-*d*)

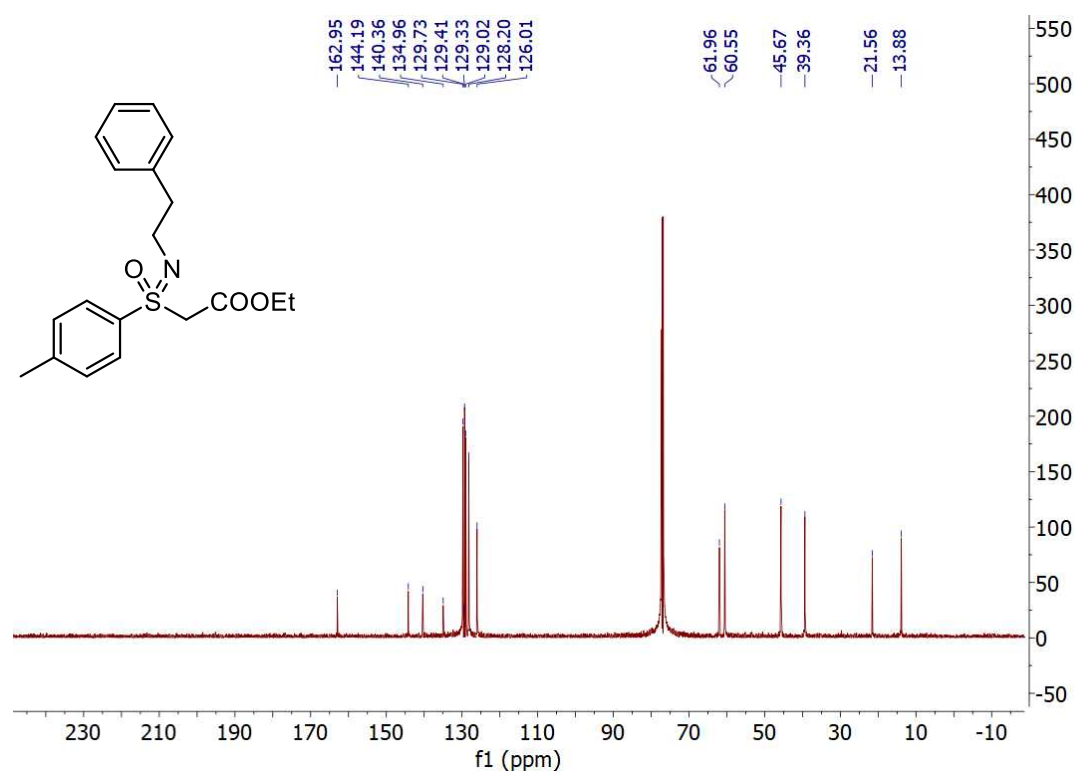

ethyl 2-(4-methyl-*N*-(2-(pyridin-2-yl)ethyl)phenylsulfonimidoyl)acetate (**3t**)

$^1\text{H}$  NMR (600 MHz, Chloroform-*d*)

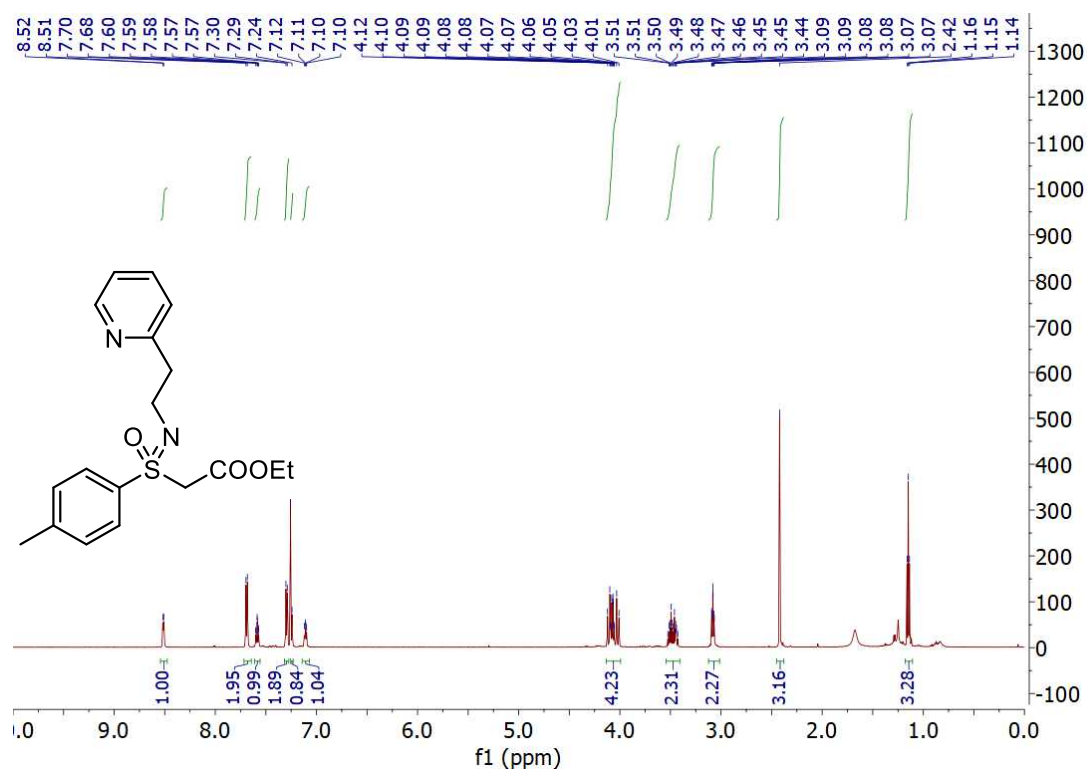

$^{13}\text{C}$  NMR (151 MHz, Chloroform-*d*)

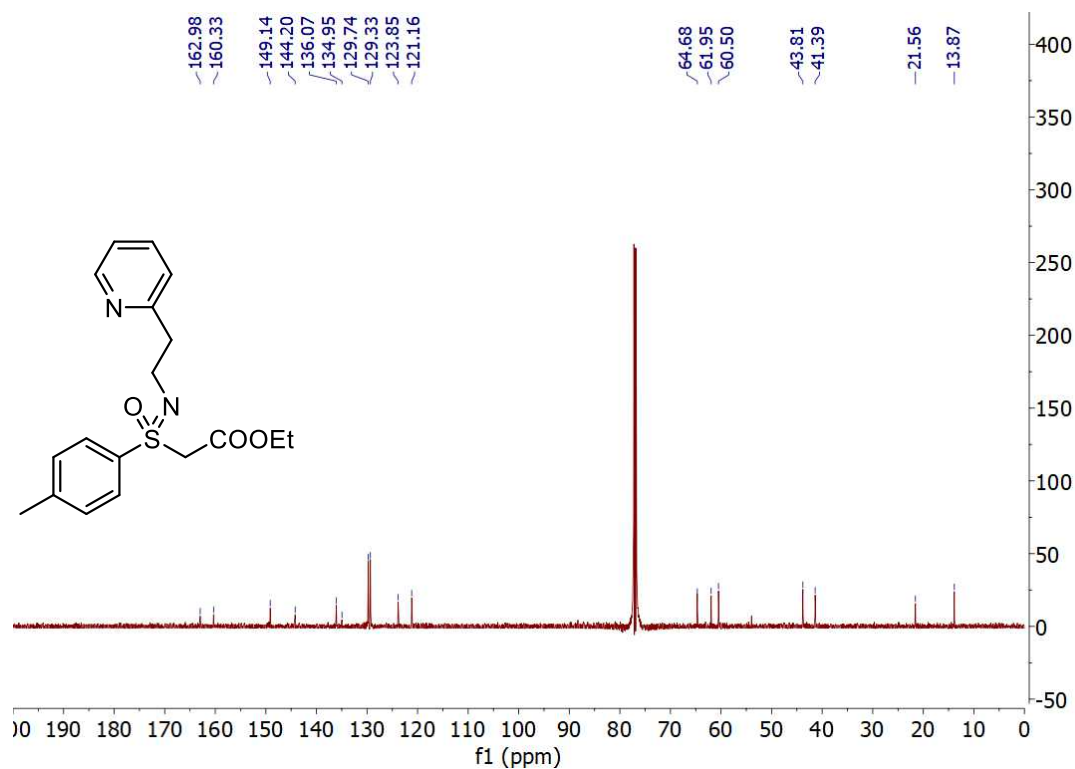

ethyl 2-(*N*-(2-methoxyethyl)-4-methylphenylsulfonimidoyl)acetate (**3u**)

$^1\text{H}$  NMR (600 MHz, Chloroform-*d*)

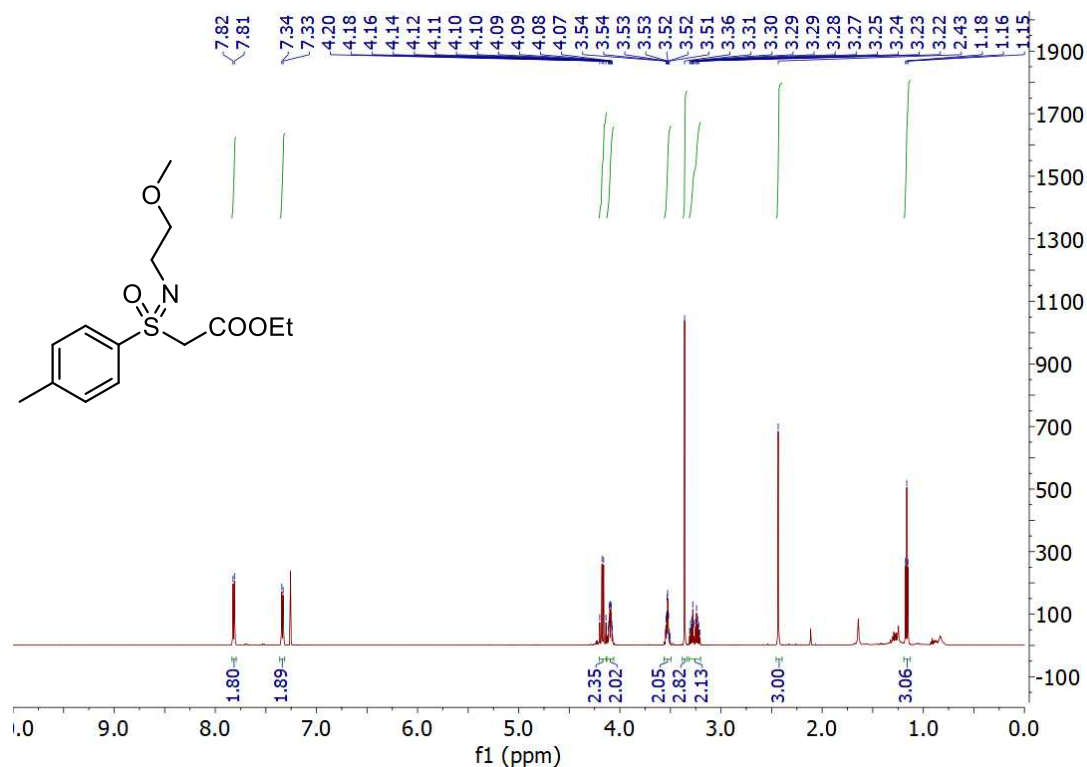

$^{13}\text{C}$  NMR (151 MHz, Chloroform-*d*)

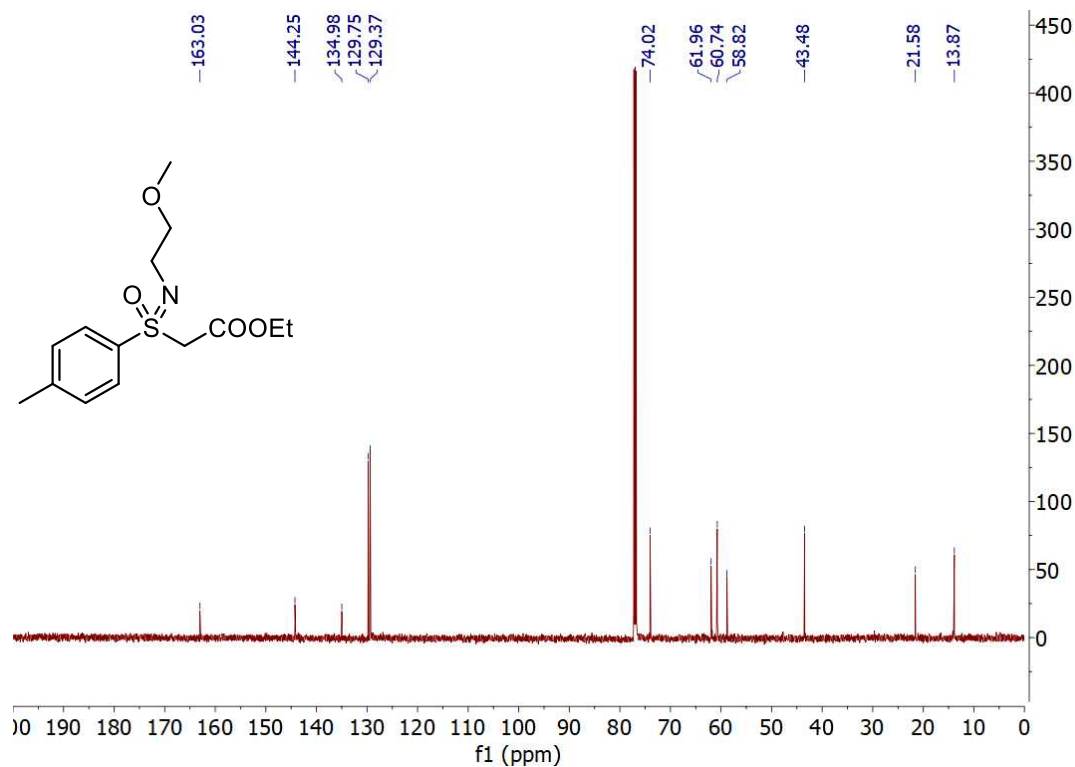

ethyl 3-(((2-ethoxy-2-oxoethyl)(oxo)(*p*-tolyl)- $\lambda^6$ -sulfaneylidene)amino)propanoate  
(3v)

$^1\text{H}$  NMR (600 MHz, Chloroform-*d*)

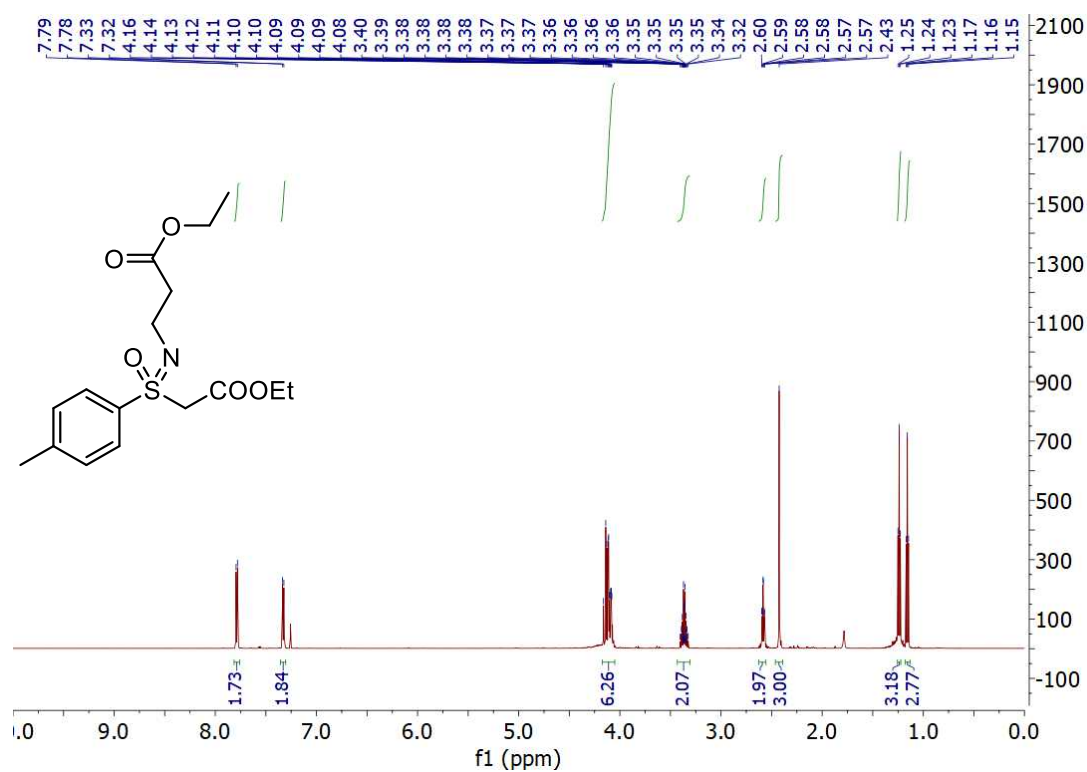

$^{13}\text{C}$  NMR (151 MHz, Chloroform-*d*)

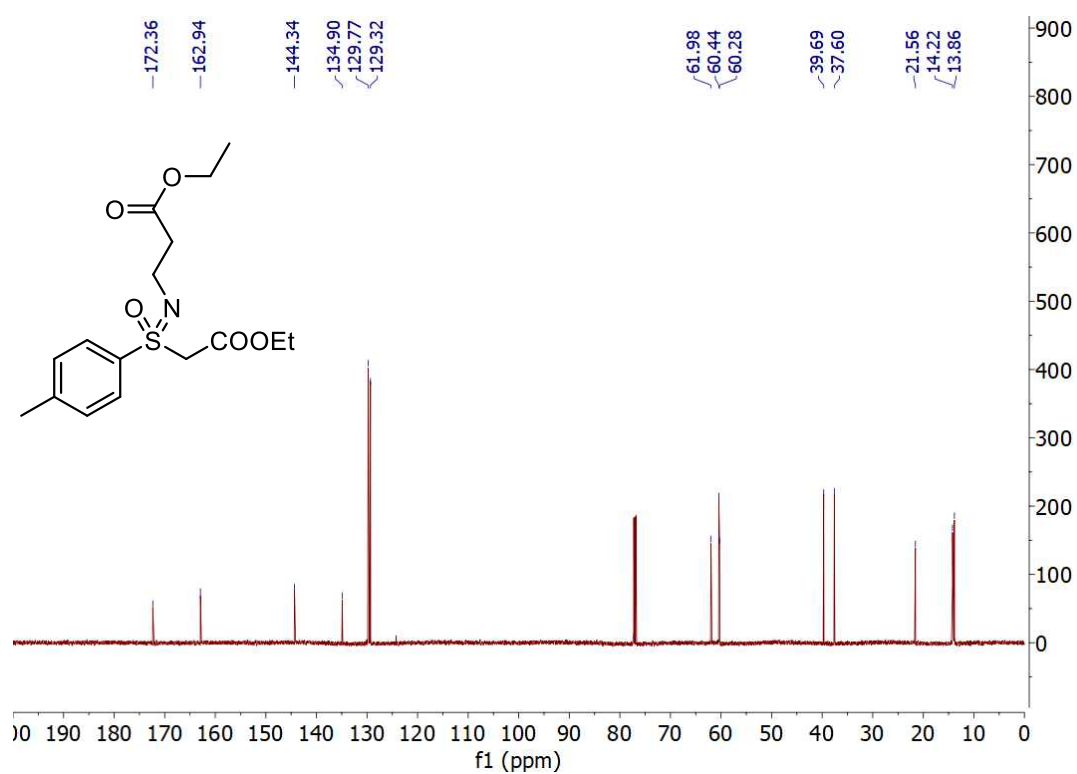



**Ethyl 2-(N-(2-((tert-butoxycarbonyl)amino)ethyl)-4-methylphenylsulfonimidoyl)acetate (3w)**

<sup>1</sup>H NMR (600 MHz, Chloroform-*d*)

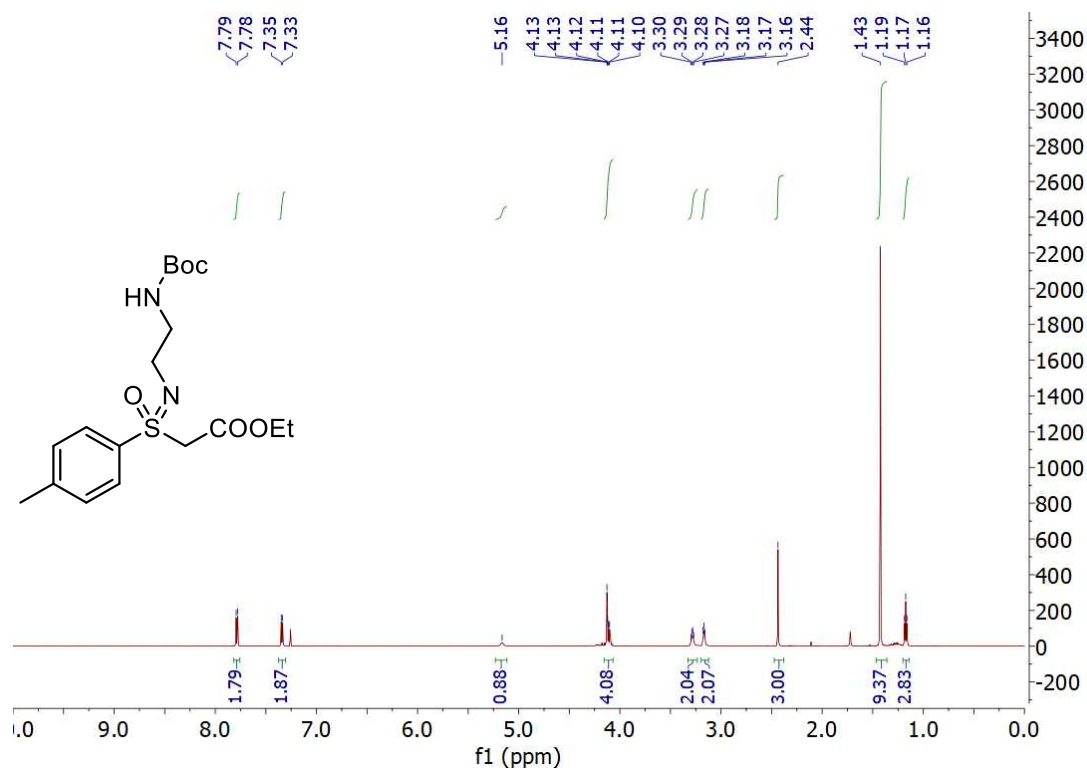

<sup>13</sup>C NMR (151 MHz, Chloroform-*d*)

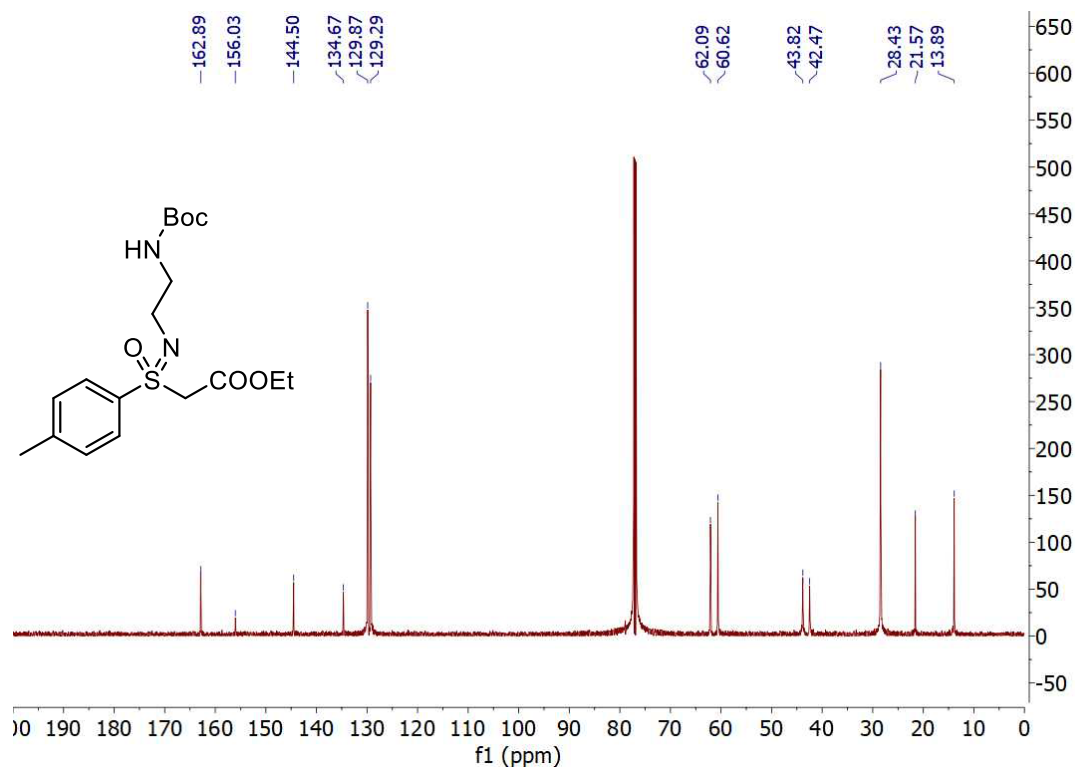

**ethyl 2-(4-methyl-*N*-(2-((*p*-tolylsulfinyl)amino)ethyl)phenylsulfonimidoyl)acetate  
(3x)**

**<sup>1</sup>H NMR (600 MHz, Chloroform-*d*)**

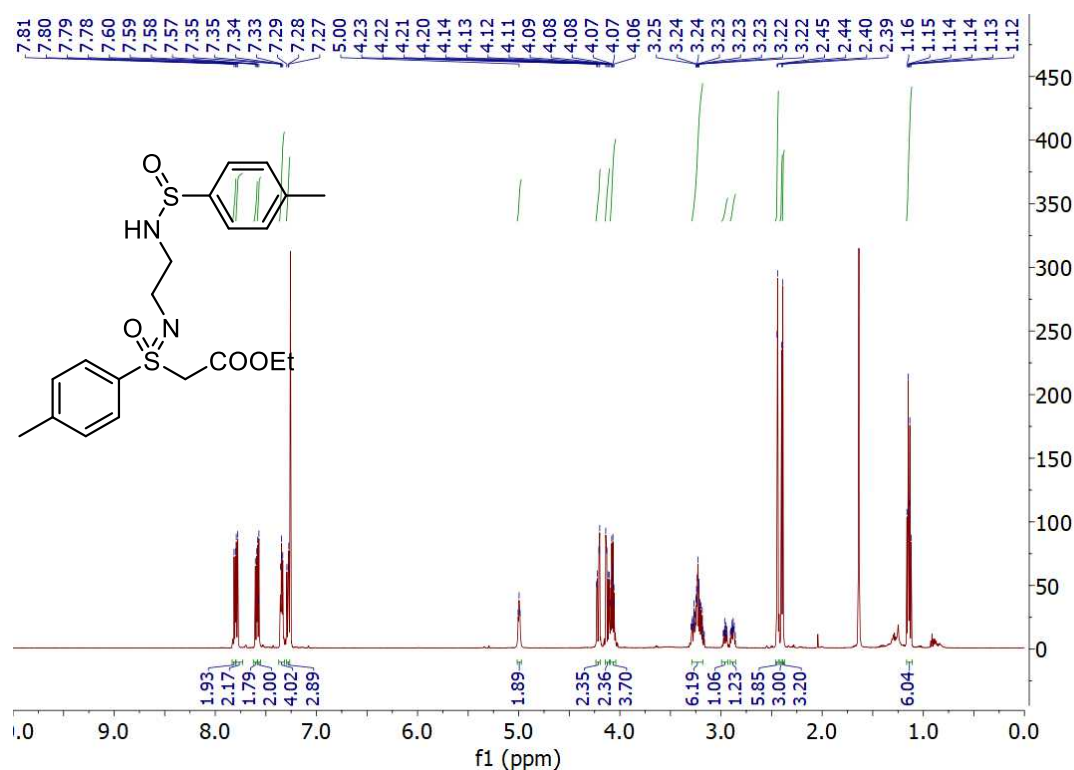

**<sup>13</sup>C NMR (151 MHz, Chloroform-*d*)**

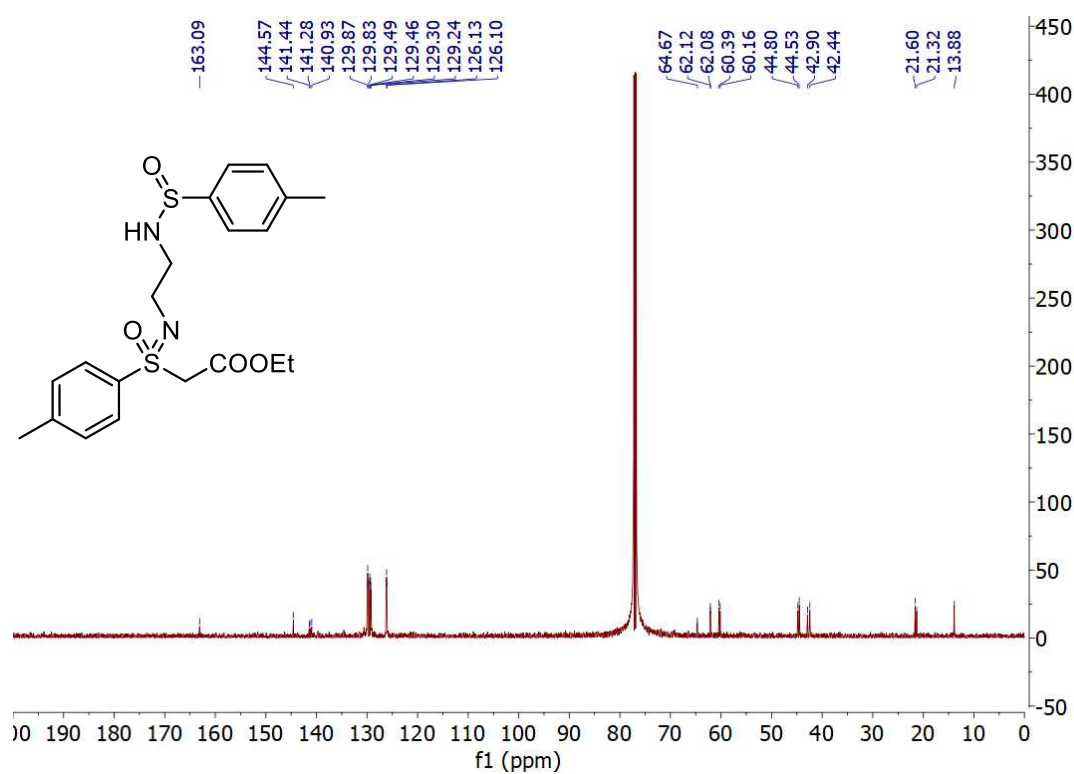

benzhydryl(isopropylimino)(phenyl)- $\lambda^6$ -sulfanone (3y)

$^1\text{H}$  NMR (600 MHz, Chloroform-*d*)

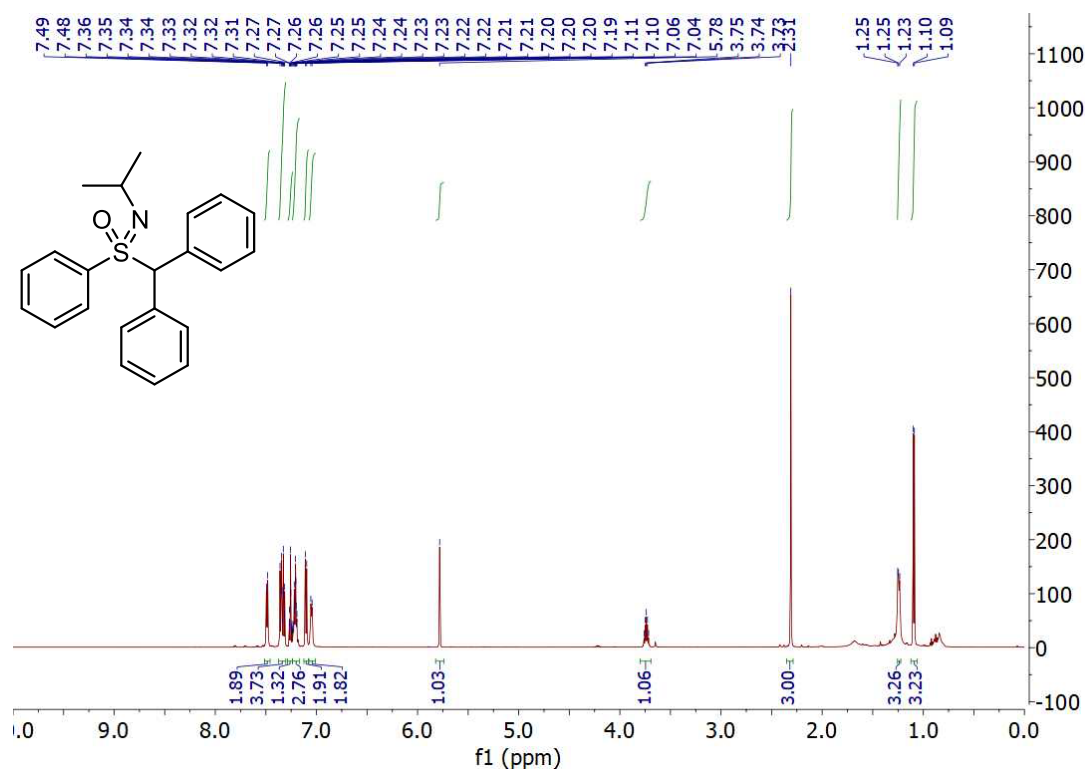

$^{13}\text{C}$  NMR (151 MHz, Chloroform-*d*)

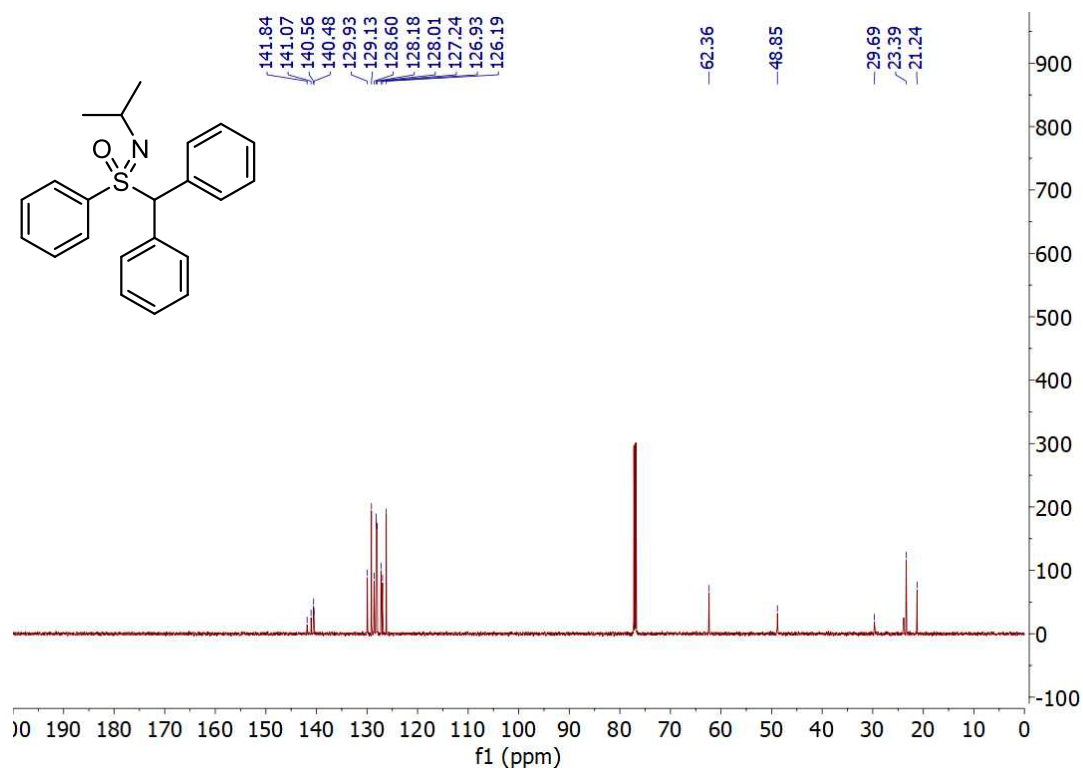

**methyl 2-(*N*-isopropyl-4-methylphenylsulfonimidoyl)-2-phenylacetate (3z)**

**<sup>1</sup>H NMR (600 MHz, Chloroform-*d*)**

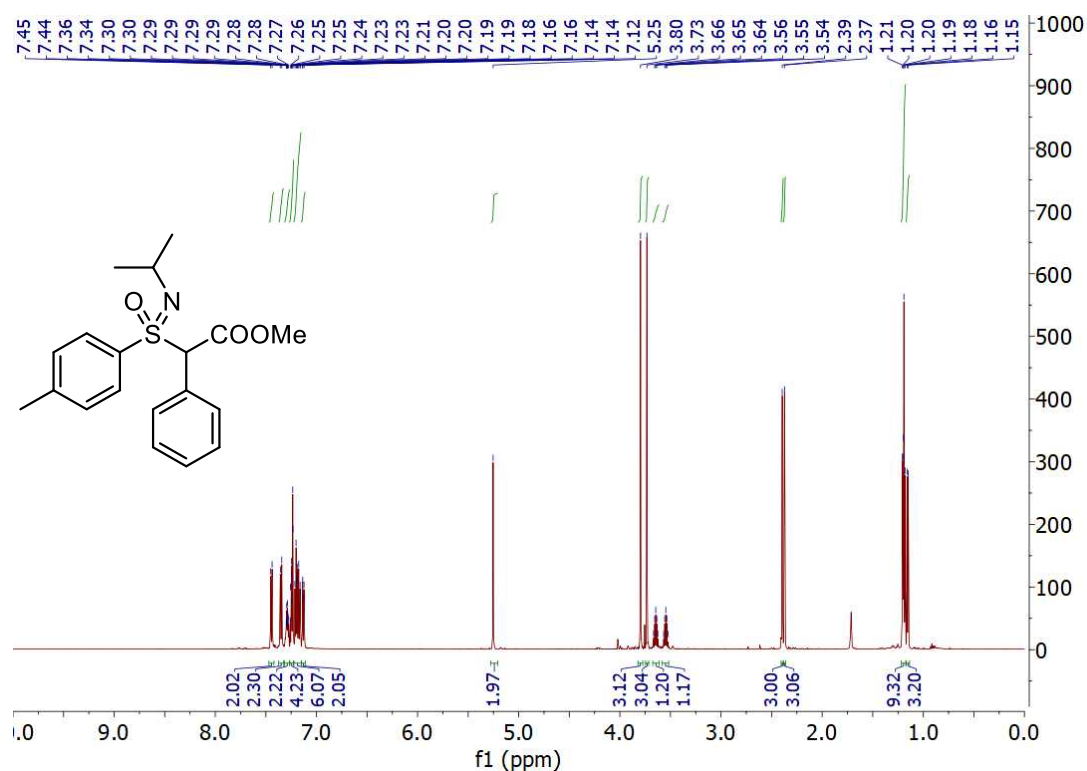

**<sup>13</sup>C NMR (151 MHz, Chloroform-*d*)**

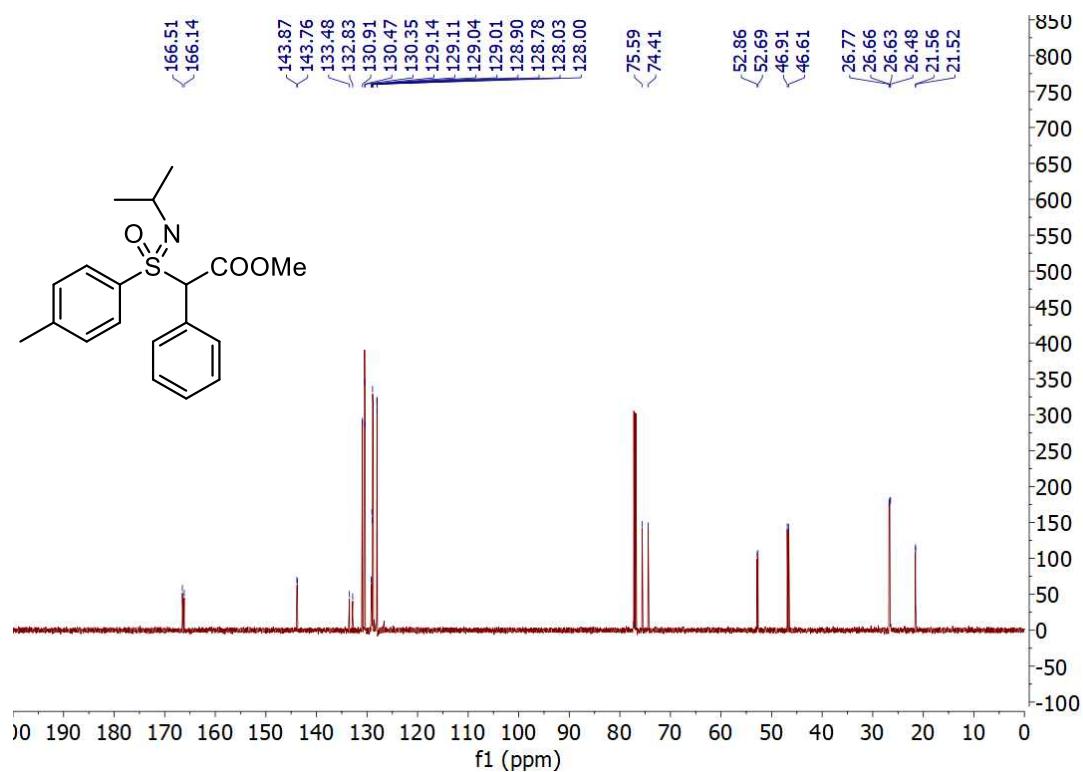

**(1*R*,2*S*,5*R*)-2-isopropyl-5-methylcyclohexyl 2-(*N*-isopropyl-4-methylphenylsulfonimidoyl)acetate (3aa)**

**<sup>1</sup>H NMR (600 MHz, Chloroform-*d*)**

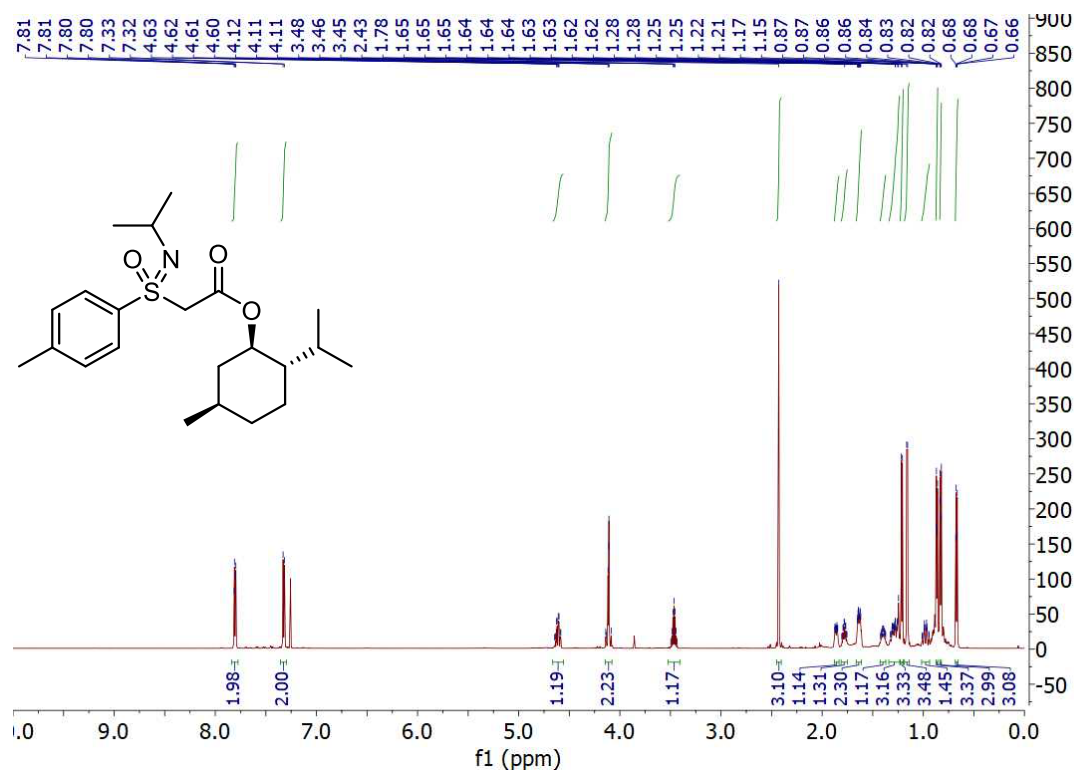

**<sup>13</sup>C NMR (151 MHz, Chloroform-*d*)**

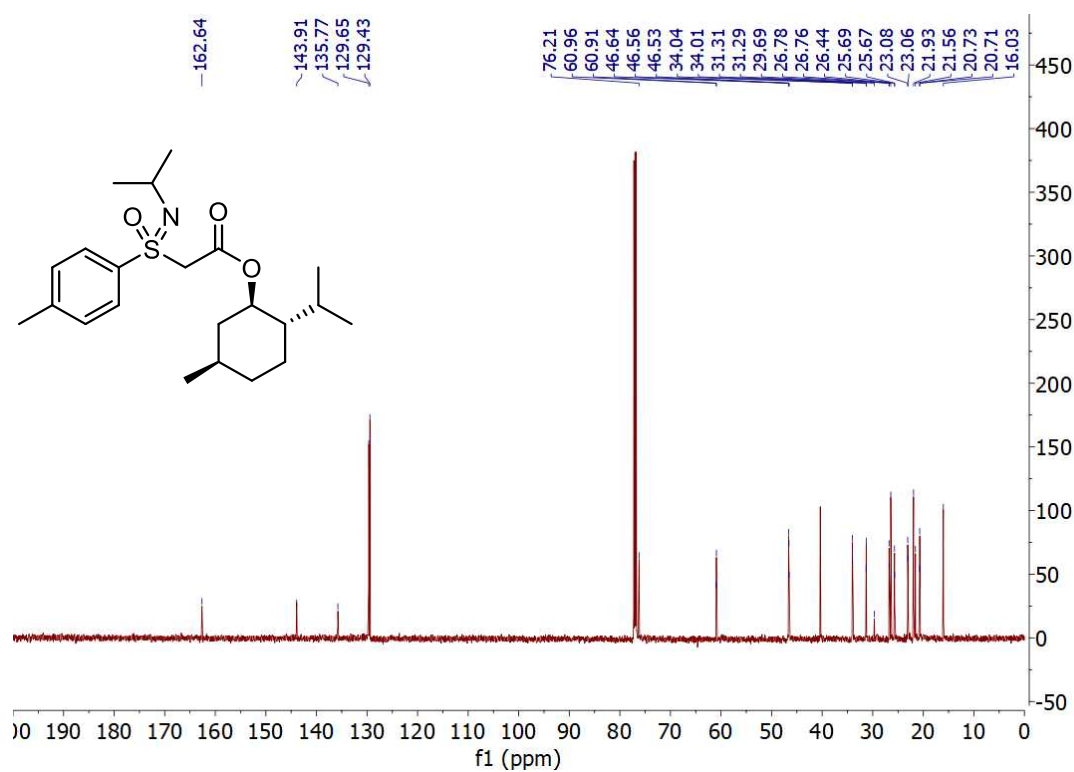

**(2*R*)-4,7,7-trimethylbicyclo[2.2.1]heptan-2-yl 2-(*N*-isopropyl-4-methylphenylsulfonimidoyl)acetate (3ab)**

<sup>1</sup>H NMR (600 MHz, Chloroform-*d*)

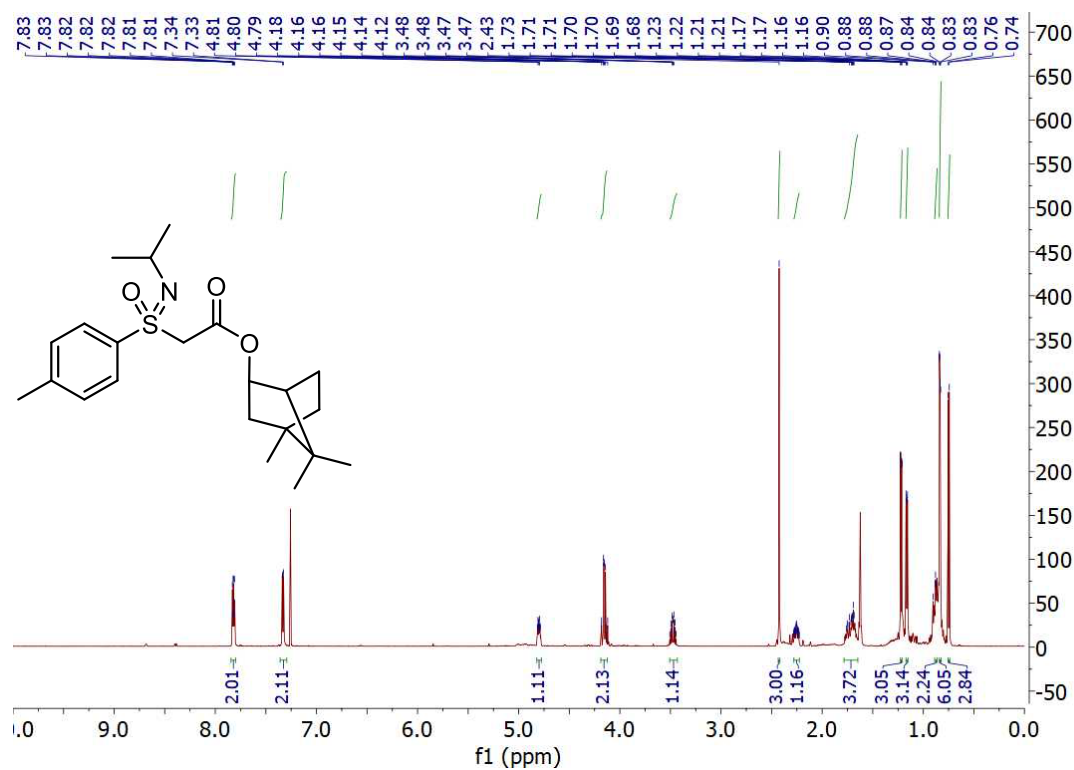

<sup>13</sup>C NMR (151 MHz, Chloroform-*d*)

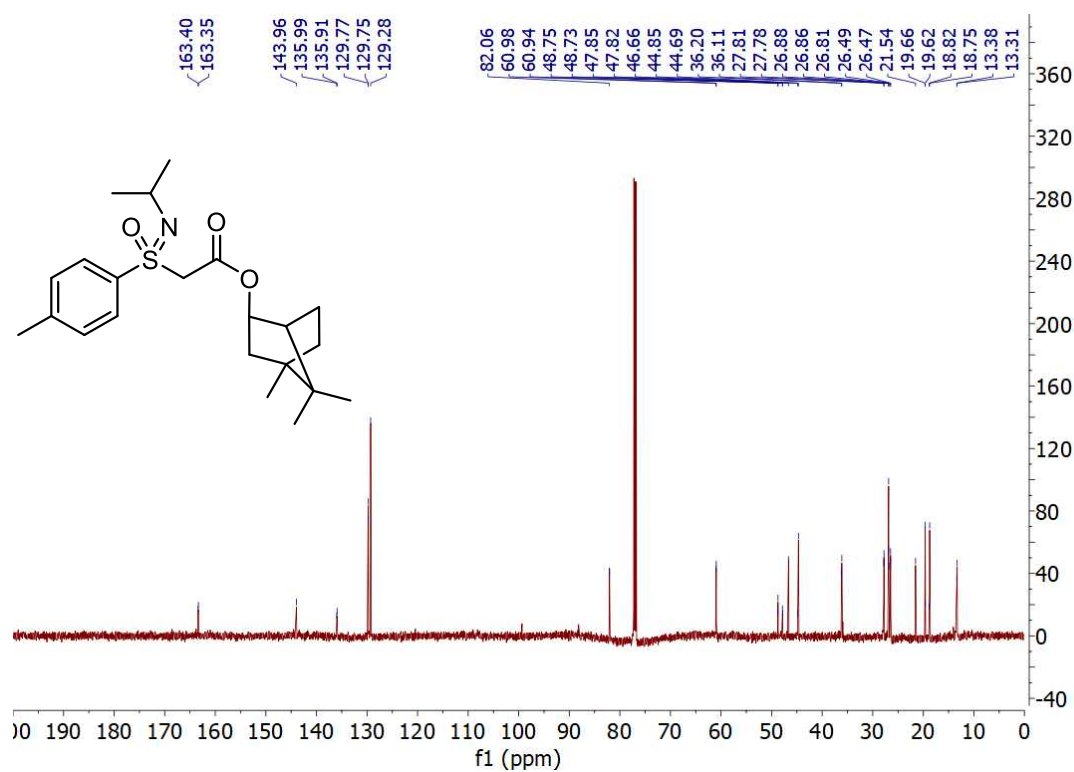

**8-hydroxy-3-(*N*-isopropyl-4-methylphenylsulfonimidoyl)-2H-chromen-2-one (4a)**

$^1\text{H}$  NMR (600 MHz, DMSO- $d_6$ )

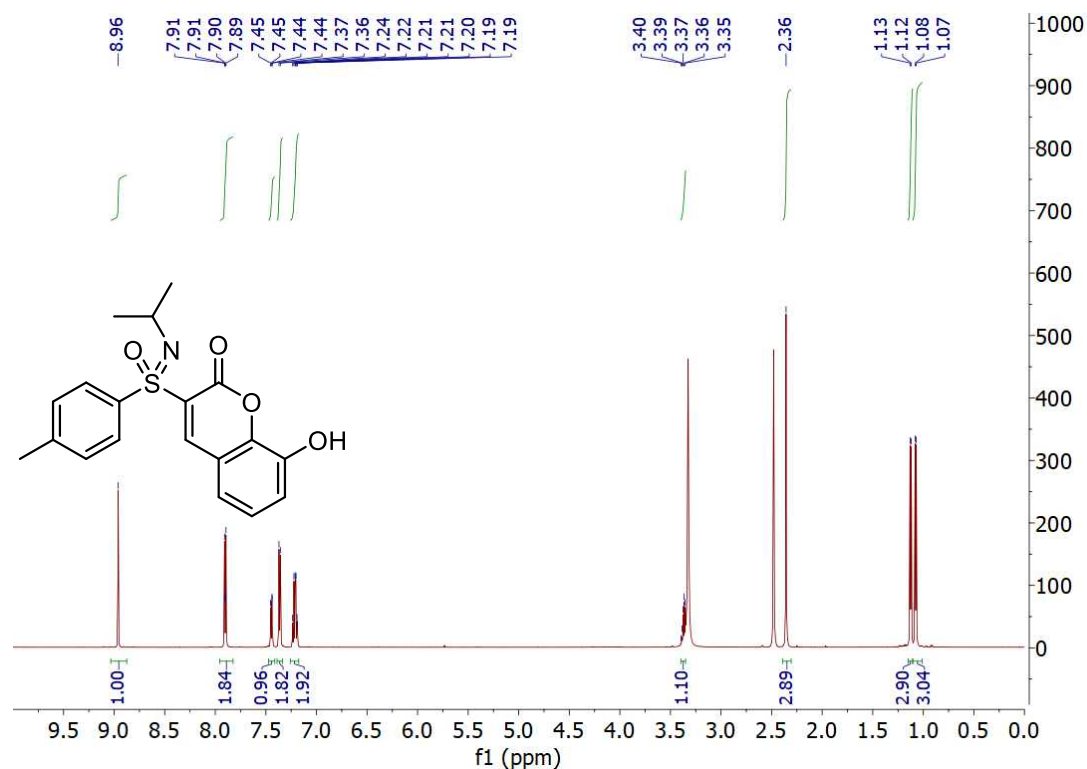

$^{13}\text{C}$  NMR (151 MHz, DMSO- $d_6$ )

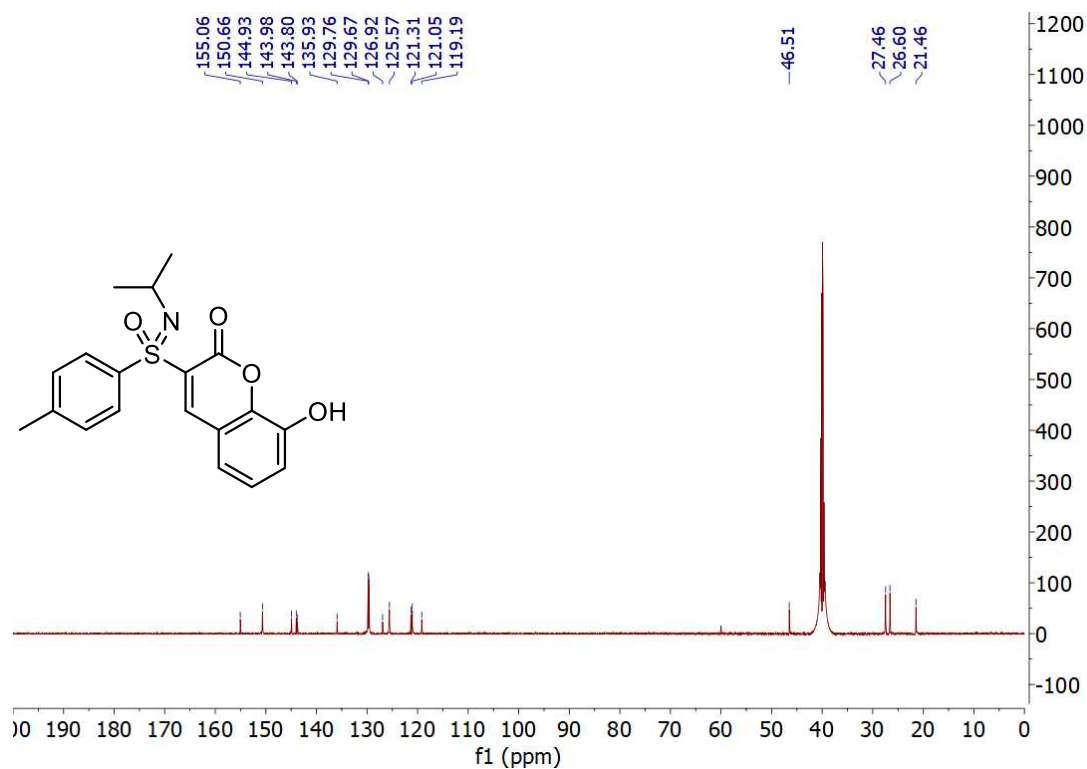



ethyl 2,2-dichloro-2-(*N*-isopropyl-4-methylphenylsulfonimidoyl)acetate (4b)

$^1\text{H}$  NMR (600 MHz, Chloroform-*d*)

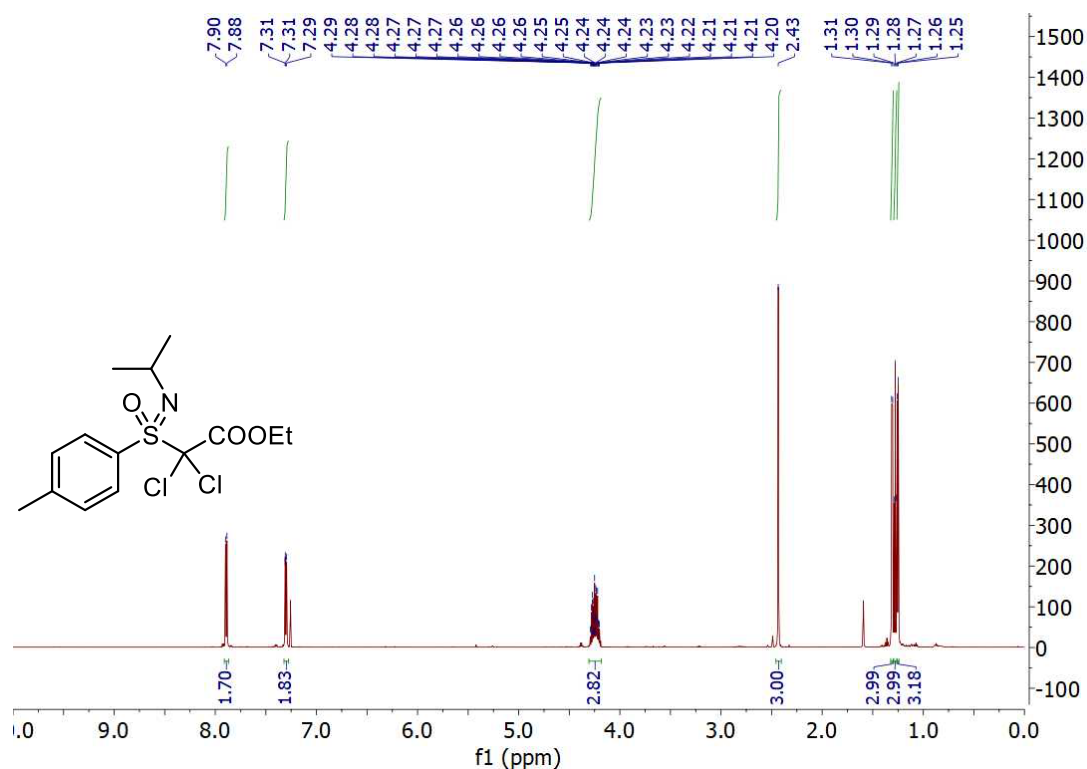

$^{13}\text{C}$  NMR (151 MHz, Chloroform-*d*)

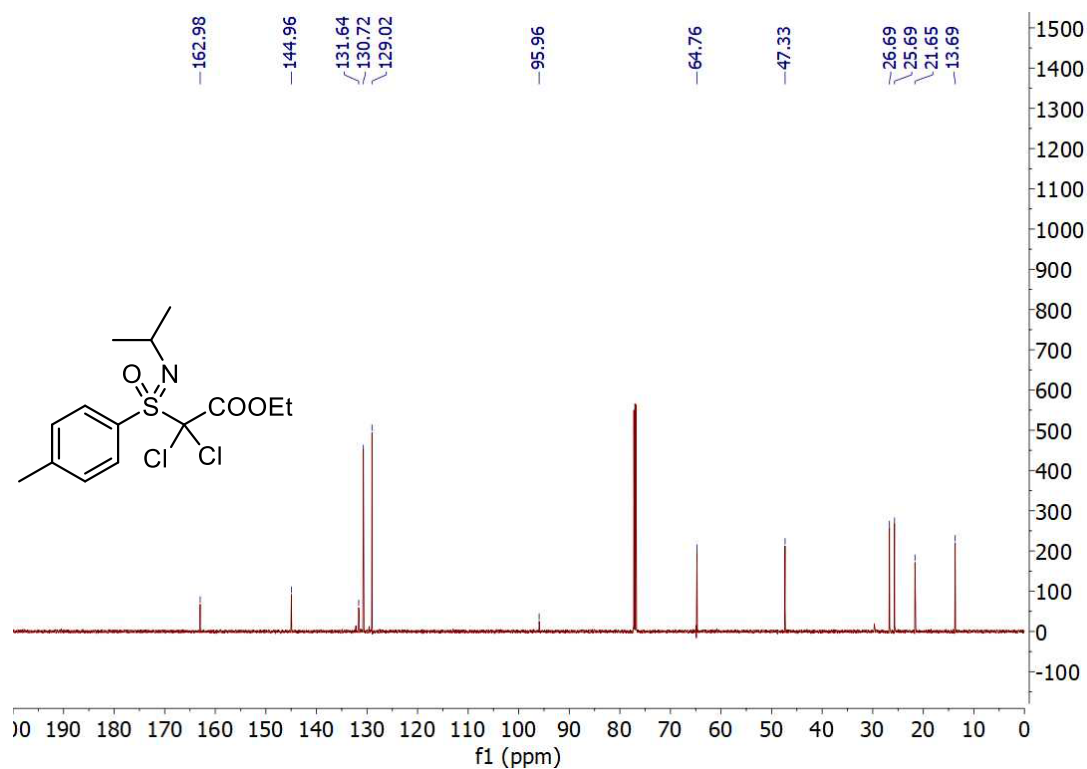



ethyl 2-(*N*-isopropyl-4-methylphenylsulfonimidoyl)-3-phenylpropanoate (4c)

$^1\text{H}$  NMR (600 MHz, Chloroform-*d*)

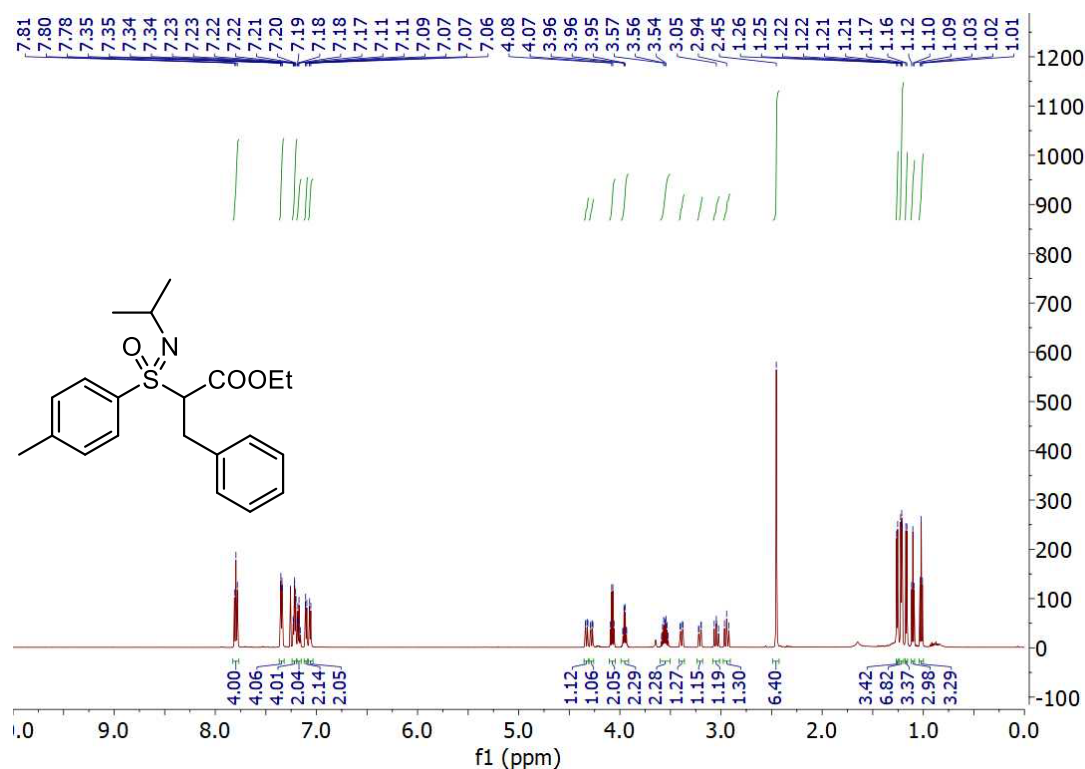

$^{13}\text{C}$  NMR (151 MHz, Chloroform-*d*)

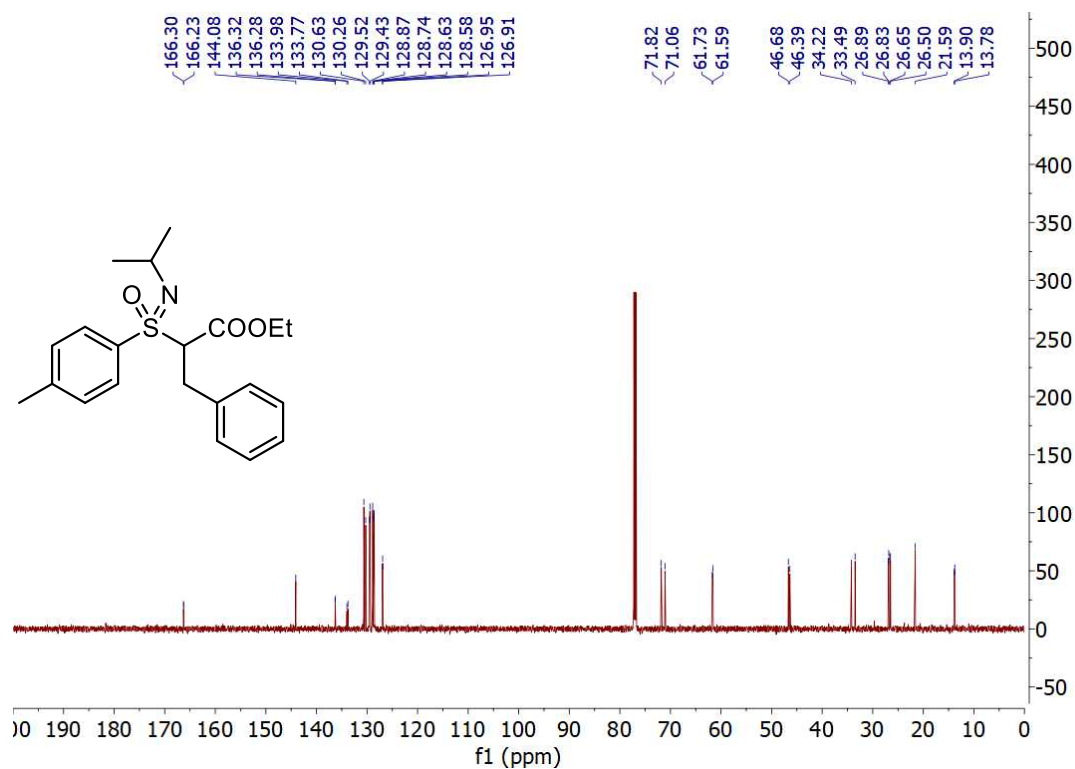

ethyl 2-(*N*-isopropyl-4-(phenylamino)phenylsulfonimidoyl)acetate (4d)

$^1\text{H}$  NMR (600 MHz, Chloroform-*d*)

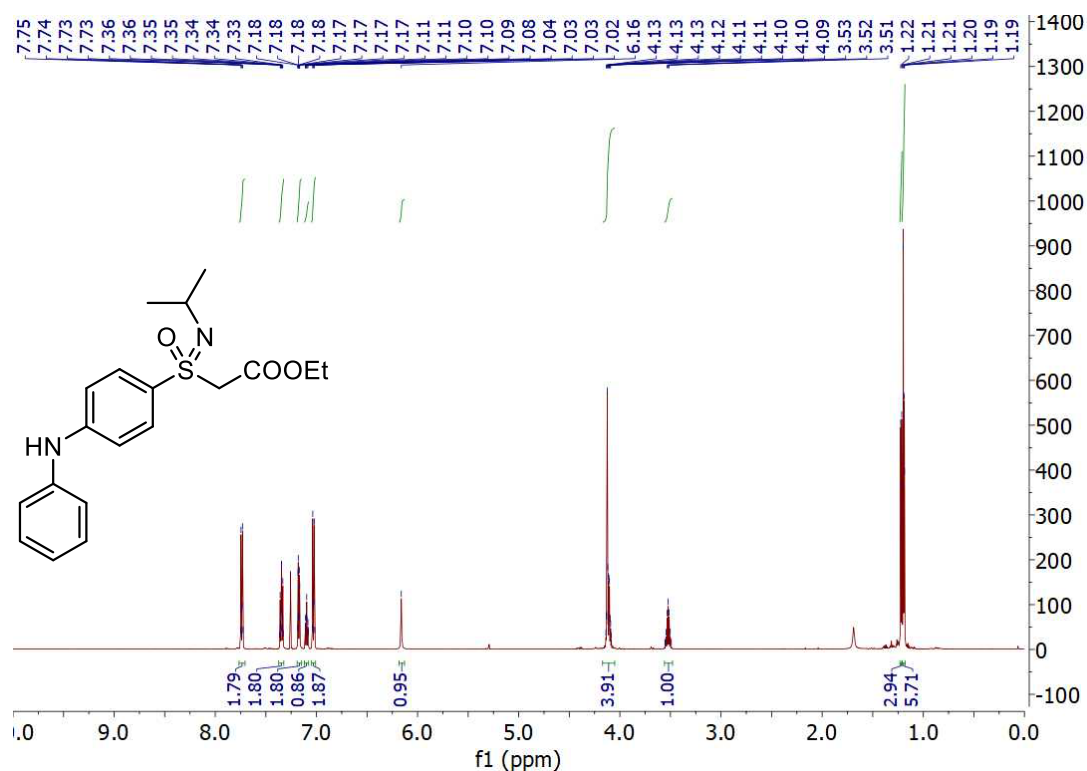

$^{13}\text{C}$  NMR (151 MHz, Chloroform-*d*)

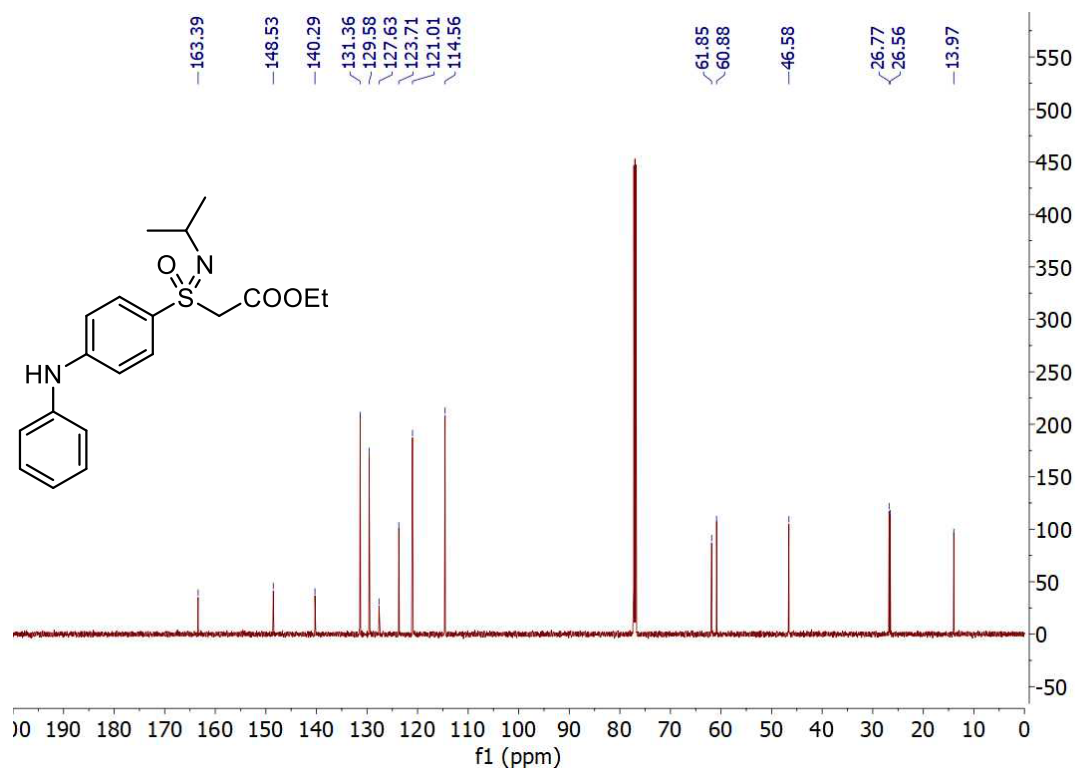

## 8. References

- [1] A. U. Meyer, S. Jager, D. Prasad Hari and B. König, *Adv. Synth. Catal.*, 2015, **357**, 2050–2054.
- [2] Y. Z. Ji, J. Y. Zhang, H. J Li, C. Han, Y. K. Yanga and Y. C. Wu, *Org. Biomol. Chem.*, 2019, **17**, 4789–4800.
- [3] Y. Xie, Y. P. Bao, X. Y. Zhuo and J. Xuan, *Org. Lett.*, 2024, **26**, 1393–1398
- [4] Y. X. Wang, H. R. Wang, J. S. Zhao, X. C. Yang, B. Fang, Z. L. Zang, R. X. Geng and C. H. Zhou, *Bioorg. Chem.*, 2025, **158**, 108339.
- [5] M. D. Rathnayake and J. D. Weaver III, *Org. Lett.*, 2019, **21**, 9681–9687.
- [6] V. Aranapakam, G. T. Grosu, J. M. Davis, B. Hu, J. Ellingboe, J. L. Baker, J. S. Skotnicki, A. Zask, J. F. DiJoseph, A. Sung, M. A. Sharr, L. M. Killar, T. Walter, G. Jin and R. Cowling, *J. Med. Chem.*, 2003, **46**, 2361–2375.
- [7] J. Düker, M. Philipp, T. Lentner, J. A. Cadge, J. E. A. Lavarda, R. M. Gschwind, M. S. Sigman, I. Ghosh and B. König, *ACS Catal.*, 2025, **15**, 817–827.
